# Supplementary material
Source: publisher figshare collection journal article supplement (https://brill.figshare.com/ndownloader/files/3571712)
Supplement: Supplementary file 1 [file 3571712]

## Sheet: Sheet1
CLONE	PRIMER_LEFT	LEFT_TM	LEFT_GC_PERCENT	LEFT_START	PRIMER_RIGHT	RIGHT_TM	RIGHT_GC_PERCENT	RIGHT_START	Start BP	Repeat	End BP	Type
HMEZZP203FKZH3	AGTATTTGTATACTGCTCTTCGTG	57.385	37.5	31	TGTACCAGAACTTCCTTATGGG	57.939	45.455	203	104	(AC)^16(AT)^8	152	Compound
HMEZZP203FW443	TGTCCTCAGCTCCTGCTAAC	59.864	55	3	AGCACATTGTTTGCTCTGAC	57.672	45	207	38	(AACTT)^6(CACTT)^9	113	Compound
HMEZZP203G30U8	CAGTATGGAGGCCCGGAG	59.608	66.667	12	GCCGCTTTGAGTCAGCTTC	60.231	57.895	307	206	(AAG)^8(AAC)^11	263	Compound
HMEZZP203G60HI	GCCTTCACAGCAGAATGGG	59.561	57.895	158	GCTGCAAAGTAGGCCAAGC	60.526	57.895	406	248	(ATC)^7(ATT)^6	287	Compound
HMEZZP203GTUP9	TCGGAAGCGCAATATGCTG	59.424	52.632	22	CGCTTTGAGTCAGCTTCGG	59.941	57.895	346	250	(AAG)^7(AAC)^11	304	Compound
HMEZZP203GYOI9	AGCCATCTGACTGATACCAC	57.472	50	0	GCAGTGTCACCTAAGCTTCC	59.303	55	339	214	(GGAT)^10(AGAT)^11	298	Compound
HN7TS9H02C14M1	ACAGCTTTGGCAATTCAGTC	57.655	45	145	GGCTCAAGATGATCAAGGTTGC	60.659	50	517	377	(AAT)^7(AGT)^7	419	Compound
HN7TS9H02C657W	GAGTCCTTGTGCTGCATGG	59.565	57.895	1	TGGGCGTGCCTTAGAACTC	60.457	57.895	320	145	(CT)^12(GT)^12	193	Compound
HN7TS9H02C6HAQ	GGCACCCAGAAATGGCAC	59.771	61.111	80	CGCTTTGAGTCAGCTTCGG	59.941	57.895	296	186	(AGG)^6(AAG)^7(AAC)^9	252	Compound
HN7TS9H02C6JMQ	GACACCAATGGATCCTGCC	58.953	57.895	224	CACCAAGCTCAGCAACCTG	59.788	57.895	388	256	(AGGG)^6(AAGG)^19	356	Compound
HN7TS9H02C78ES	AGACACAAAGGAGTATCAAGACC	58.618	43.478	75	TGCCAGAACTCCATCCAGAC	60.151	55	431	150	(AAC)^7(AAT)^12	207	Compound
HN7TS9H02C8DYS	CTGCCAATGCCAAGTCTCC	59.561	57.895	15	TCCAAAGCCAGGGAAGCTG	60.691	57.895	283	139	(ATC)^7(ATT)^15	205	Compound
HN7TS9H02C915L	CTGTGCAACTCCGTGGAAG	59.497	57.895	205	TGGGCAAAGGTCACATAGG	57.786	52.632	381	287	(CT)^8(GT)^11	325	Compound
HN7TS9H02CYORI	AACGGCTTCATAATCCGGC	59.042	52.632	122	CTGCTTTGAGTCAGCTTCGG	59.943	55	552	445	(GAT)^8(AAT)^13	508	Compound
HN7TS9H02CZ7ZY	GACACCAATGGATCCTGCC	58.953	57.895	224	CCAACGCTCAGCAACCTG	59.78	61.111	386	256	(AGGG)^6(AAGG)^19	356	Compound
HN7TS9H02D0EMF	ATGATGCTGGCTGAGAACC	58.264	52.632	281	ACAGACATCAGAACAGTAGTCTTG	58.991	41.667	569	476	(AGT)^8(AAT)^12	536	Compound
HN7TS9H02D2OZP	TGCAATGCTGCTAGTGTATAAATTC	59.038	36	72	ATCACGCTGCTTGGATCTG	58.668	52.632	320	136	(ATT)^6(ATC)^13	193	Compound
HN7TS9H02D4JSX	CGCTTTGAGTCAGCTTCGG	59.941	57.895	108	GGCACCCAGAAATGGCAC	59.771	61.111	324	155	(GTT)^9(CTT)^7(CCT)^6	221	Compound
HN7TS9H02D69PD	TGCTTCAATAACTCAAGGTTGTC	58.073	39.13	12	GTCCCATCAACATGAAGCCTG	60.011	52.381	244	54	(AGAT)^15(AC)^10	134	Compound
HN7TS9H02D721X	TCCGCTAATCAGAAGTCTGGG	60.009	52.381	65	GATGAGCGCCCTCTACTGG	60.381	63.158	345	106	(AAG)^6(AAC)^10	154	Compound
HN7TS9H02DCWA3	TCCGCTAATCAGAAGTCTGGG	60.009	52.381	65	GATGAGCGCCCTCTACTGG	60.381	63.158	344	106	(AAG)^6(AAC)^10	154	Compound
HN7TS9H02DDBFU	CACTGCCCTAGTTCTTACAGC	59.131	52.381	24	TTCTGTGCATGGCCAGTTG	59.408	52.632	346	111	(GTT)^8(ATT)^10	165	Compound
HN7TS9H02DDTVZ	AGTGTGGGAACGAGCAGG	60.006	61.111	73	GGTCCTTTCTGCACTTGGC	59.786	57.895	497	229	(AC)^15(AT)^8	275	Compound
HN7TS9H02DGKEK	GCCAACAACCTAGGAAGTGC	59.868	55	113	GAGTCCACAATGGAACGCC	59.568	57.895	425	284	(AC)^10(AT)^9	322	Compound
HN7TS9H02DGMTD	TGGCTGCAATTTGTCCTGC	60.083	52.632	13	ACAACGGGTACCATCAAGC	58.506	52.632	209	47	(ATT)^20(ACT)^11	140	Compound
HN7TS9H02DJK1M	GGAAGACTCCCTACCATCAGC	60.352	57.143	216	TGCATGTACTCCAATTGTGCC	59.942	47.619	511	313	(ATT)^7(GTT)^7...(ATT)^6(AGT)^6	400	Compound
HN7TS9H02DJT1D	GACCTCGCTATACCTCTGGG	59.507	60	73	GGAAAGCGAACATCCTGCC	59.937	57.895	302	119	(ATT)^6(AAT)^8	161	Compound
HN7TS9H02DOZLD	AGTGTGGGAACGAGCAGG	60.006	61.111	73	TGGAAGGTCTTGCCCAACG	60.985	57.895	422	229	(AC)^15(AT)^8	275	Compound
HN7TS9H02DRVFU	TCCGCTAATCAGAAGTCTGGG	60.009	52.381	65	GATGAGCGCCCTCTACTGG	60.381	63.158	344	106	(AAG)^6(AAC)^10	154	Compound
HN7TS9H02DS3PW	GCTTTGAGTCAGCTTCGGC	60.231	57.895	90	CACCTGGACCTAGTGTTCCC	60.151	60	349	136	(ATT)^13(ATC)^8	199	Compound
HN7TS9H02DSATF	ACAGCCTCCCAATGGACTG	60.08	57.895	195	GGAGTTGGGTTTGCTAGAGG	58.642	55	494	235	(ATT)^12(AAT)^16	319	Compound
HN7TS9H02DTR5M	CCCTCTTTGGGCCTCTAGC	60.233	63.158	1	CCCAGAATGCTGCTGACAAG	59.94	55	285	182	(ATT)^13(ATC)^8	245	Compound
HN7TS9H02DVH2C	GAACACACTCGTTGGGCTG	59.792	57.895	117	GAGTCCACAATTGCCTCCTG	59.296	55	438	209	(ATT)^11(ACT)^6	260	Compound
HN7TS9H02DW32Z	AGTCTGAGCAAACCTTATCCAC	58.824	45.455	131	TCCAACGGCAGTGAGAATTG	59.228	50	575	248	(ATT)^8(AAT)^16	320	Compound
HN7TS9H02DWEQU	ACCATACTGGTCATTCAGCAAC	59.42	45.455	71	GGGACAAACTAGTGGAGAATCTTG	59.832	45.833	514	350	(AT)^8(GT)^13	392	Compound
HN7TS9H02DWMG7	TGGTGGTTCTCAGTTTGCAG	59.077	50	173	AGCAGGGTTAGCTAGAGGC	59.241	57.895	505	298	(ATCT)^11(ATCC)^6	366	Compound
HN7TS9H02DXIE6	GAGCCTTCCTCATTGCACC	59.261	57.895	110	TGTCACACTGTATAGCACTAAGC	59.017	43.478	528	417	(ACT)^8(ATT)^10	471	Compound
HN7TS9H02DY8NZ	TGCCTTAACTGCTATCAGCAAC	59.751	45.455	95	TCAGGCACTTTGTCTTCCAG	58.497	50	369	255	(AAC)^9(AAT)^6	300	Compound
HN7TS9H02EE7WP	AGAAGGAGGTTTCATTTCCATCC	59.178	43.478	145	TGTTCCTGTGCCTTTCTAAATTC	58.061	39.13	565	290	(GTT)^8(ATT)^16	362	Compound
HN7TS9H02EFS0X	GCCTCACCTGGAAATTGGG	59.174	57.895	244	AGCAGGAGTGGGTGTCTAAAG	60.146	52.381	513	428	(CT)^9(GT)^10	466	Compound
HN7TS9H02EGLKY	ACAGCTTTGGCAATTCAGTC	57.655	45	148	GCTCAAGATGATCAAAGGTTGC	58.984	45.455	519	380	(AAT)^7(AGT)^7	422	Compound
HN7TS9H03F77VS	ACACCGGTAATAAACAATGCCTC	60.075	43.478	241	GGTTTACAGCTCGCATTTGAC	58.886	47.619	505	435	(GT)^8(AT)^11	473	Compound
HN7TS9H03F94GF	AAGCCTTAGCCCACTTCGG	60.46	57.895	38	AGGGAGCCATGTACGCTTC	60.233	57.895	431	138	(AGT)^13(AAT)^12	213	Compound
HN7TS9H03F9G6X	ACCTGCCCTGGGATTCTTG	60.08	57.895	76	GCTGAGCAGGATTCAGCC	58.913	61.111	242	115	(ATCT)^13(ATCC)^11	211	Compound
HN7TS9H03FIPWV	GCTTTGAGTCAGCTTCGGC	60.231	57.895	90	CACCTGGACCTAGTGTTCCC	60.151	60	349	136	(ATT)^13(ATC)^8	199	Compound
HN7TS9H03FT2BG	CAGCCAACCTAGCTGTTCG	59.276	57.895	46	TTTCCTGTCCGTTAGCCAG	57.823	52.632	282	215	(GTT)^6(CTT)^6	251	Compound
HN7TS9H03FTQ2N	CAGCTCGGCAACGAAACTC	60.231	57.895	84	TGGATGCCCAGGTACTGTC	59.469	57.895	387	115	(AAT)^17(AAC)^6	184	Compound
HN7TS9H03FUUPG	TCAGCCTAGAAGCAGGGTC	59.166	57.895	126	AGGTCCCAGGTGCTGATAG	58.848	57.895	543	174	(AAT)^6(AAC)^7	213	Compound
HN7TS9H03G3R1T	CCTTTGAGGTCCCATCTTGC	59.29	55	33	GTTCGACCTACCATTCTGCC	59.093	55	409	239	(ATT)^16(ACT)^9	314	Compound
HN7TS9H03G4NJV	ACAGCTTTGGCAATTCAGTC	57.655	45	146	GGCTCAAGATGATCAAGGTTGC	60.659	50	518	378	(AAT)^7(AGT)^7	420	Compound
HN7TS9H03G8M05	ACTGGCAAGTTCTTTGCAC	57.396	47.368	50	TGGATGGGTTCATGATTGCAG	59.387	47.619	371	100	(ATT)^10(AGT)^9	157	Compound
HN7TS9H03GBV6F	GCTTCCTGTTCCTCGTGGG	61.125	63.158	96	ACCAAGTGAGTAATGAAGGCAC	59.354	45.455	421	269	(GTT)^7(ATT)^15	335	Compound
HN7TS9H03GEEZ7	CGCTTTGAGTCAGCTTCGG	59.941	57.895	16	TCGGAAGCGCAATATGCTG	59.424	52.632	346	63	(GTT)^11(CTT)^7	117	Compound
HN7TS9H03GK150	TGTCTGACGCCACCATGAG	60.456	57.895	79	GACTGCTTTATCACCCATCCAG	59.554	50	459	306	(CTATT)^9(CTGTT)^9(CCATT)^6	426	Compound
HN7TS9H03GN9HP	TCAAGTGTAGCTATTTGGGAAGTG	59.528	41.667	118	TGGCCTTGATGGTGTTCCC	60.693	57.895	392	184	(AAC)^7(AAT)^6	223	Compound
HMEZZP203F0JRQ	CTTGAGAAGTACCCAGGCAG	58.361	55	16	GAAGCCACCCACAGTAAGTC	58.942	55	214	88	(AT)^9	106	Dinucleotide
HMEZZP203F18RO	AGGTCATGTTGCTTTGCCTG	59.794	50	8	TCATATGCTTGATTTCATCTCCCG	59.772	41.667	214	101	(GT)^10	121	Dinucleotide
HMEZZP203F1IAB	CTCAGCTGGTGCCGGAG	60.499	70.588	35	AGAAGCAGACAACTTACAAGCC	59.62	45.455	297	85	(GT)^9	103	Dinucleotide
HMEZZP203F1P6F	CACATCTCCTCCGGGATCG	60.083	63.158	12	GCGCAGGTTCTAAAGGCG	59.936	61.111	188	119	(GT)^11	141	Dinucleotide
HMEZZP203F1VSK	CCTTCCAGATAGACCAAAGGC	58.839	52.381	5	AGGATCCAGGAGGAACTGTC	58.902	55	254	150	(AC)^16	182	Dinucleotide
HMEZZP203F2P82	TGGCTTGACTGCAAGTCTG	58.736	52.632	79	AGTGAACACAGCTGCAATACC	59.603	47.619	498	430	(GT)^8	446	Dinucleotide
HMEZZP203F32C4	CCATGCCTTTGAATGTCCCG	60.294	55	123	AAGTGTGCCTCCAGCTTCC	60.688	57.895	404	227	(AC)^9	245	Dinucleotide
HMEZZP203F3ISQ	GCTCTCAGCAGGAATTTGGG	59.653	55	135	TTTGCAAGCCATGCTGTTC	58.15	47.368	331	273	(GT)^9	291	Dinucleotide
HMEZZP203F4KHO	CTGGATGCCACATTGCTCTG	60.011	55	1	AAACAGGGCTGGAAGAGGC	60.691	57.895	308	225	(AC)^8	241	Dinucleotide
HMEZZP203F53ZC	TGTAGATACTCCATACATGTGCAAC	59.493	40	23	GCATAGTAGGTTGAGACCACATTAG	59.784	44	185	65	(AG)^8	81	Dinucleotide
HMEZZP203F5O09	ATTCCAAGGGACAGTGGGC	60.387	57.895	7	GACTCCCGTCAGCCATACC	60.307	63.158	436	275	(GT)^8	291	Dinucleotide
HMEZZP203F63HI	AGTATTTGTATACTGCTCTTCGTG	57.385	37.5	31	TCTCCATTCTAGCATTCATGTGG	59.062	43.478	278	104	(AC)^16	136	Dinucleotide
HMEZZP203F692X	ACACAGGTCTATGACCAGGC	59.862	55	39	GGAAGTGGTAGACAGCCAAG	58.652	55	192	110	(AC)^8	126	Dinucleotide
HMEZZP203F6EGJ	CTTGGTGGACCTGAACTGC	59.113	57.895	179	CACTGGGCCTGATTTCTGC	59.561	57.895	341	217	(GT)^12	241	Dinucleotide
HMEZZP203F6H14	AGAACATCTGGGAGGTGCC	59.774	57.895	20	CCATGGAGAAGCATAAAGGCG	60.147	52.381	390	168	(AC)^8	184	Dinucleotide
HMEZZP203F6UDQ	CCCAGCATAAGATGAGCTGTC	59.264	52.381	97	TGGTAGCAGCCAGATGTCC	59.854	57.895	425	235	(GT)^9	253	Dinucleotide
HMEZZP203F8JCR	CCACATCTAGTGGTAGAACATTCC	59.41	45.833	12	GCAAGCACCTGTGGAAGAC	59.788	57.895	207	55	(GT)^10	75	Dinucleotide
HMEZZP203F9RAL	AAGGTACTTTGGATCATCACTTG	57.288	39.13	23	ACAGTGTCCACTTTGTATGAAGG	59.381	43.478	178	110	(AC)^12	134	Dinucleotide
HMEZZP203FH973	GGCCATTGCCATATGTTTGC	59.162	50	77	TGTCTCAACCCTTGCCCAC	60.613	57.895	341	256	(AC)^20	296	Dinucleotide
HMEZZP203FK824	CCAACAGTTTGCATTGCCG	59.21	52.632	61	CCAAGCAGATCTCCAAACCC	59.29	55	244	161	(AG)^8	177	Dinucleotide
HMEZZP203FKBUW	GGGTAAGTGTGGAAACAGCC	59.51	55	13	TGCATGTCTTGAGTAATTTCCTTG	58.509	37.5	286	162	(GT)^11	184	Dinucleotide
HMEZZP203FKMM4	TGGTGCCTTGTGGATCCTG	60.386	57.895	97	GCATACGGACGCTACCAAC	59.432	57.895	290	230	(AC)^12	254	Dinucleotide
HMEZZP203FKTY2	GGCGACACTTAAACCGGAC	59.575	57.895	22	TGGGCCAGTAACACTTTGC	59.027	52.632	449	371	(GT)^9	389	Dinucleotide
HMEZZP203FM9O3	GTTCAACAATTGAGCAGGTTGG	59.369	45.455	89	CCCTCAATGTAAGTCAGGTTCG	59.494	50	306	123	(AT)^9	141	Dinucleotide
HMEZZP203FN0RL	CCGCCACTGATTGAACCTC	59.27	57.895	38	ACATCAGACAGCGGGTAGG	59.553	57.895	339	98	(CT)^8	114	Dinucleotide
HMEZZP203FN6RC	TCAGATAATGTCAAGTTCTGTGC	57.64	39.13	27	AATCGCTTTGGTGGAGTGC	59.488	52.632	267	109	(AC)^8	125	Dinucleotide
HMEZZP203FOE0L	TCCCTGAGAGAACCAAGGC	59.39	57.895	158	GGTGTGGAACCATTCTGGC	59.483	57.895	356	258	(GT)^9	276	Dinucleotide
HMEZZP203FPBXL	GCAGAGGCCCATGCAATTAG	60.081	55	43	GGTGTGAATGCTAGTGCCC	59.264	57.895	278	115	(GT)^9	133	Dinucleotide
HMEZZP203FQCKH	AGTCTCCCAACTGCTGACC	59.701	57.895	158	AGGAAATGGAACAAGAAACTACC	57.47	39.13	318	252	(GT)^12	276	Dinucleotide
HMEZZP203FS5J3	GTTCGAAGGAGCGATTGGG	59.351	57.895	23	GCTTAGTCCAGCTTCTTGCAC	60.281	52.381	252	181	(GT)^11	203	Dinucleotide
HMEZZP203FSJ1J	GGTCTGGGTACACTGCTTG	58.513	57.895	1	CAAATGGACTGCTCCAGGG	58.876	57.895	428	87	(AT)^9	105	Dinucleotide
HMEZZP203FSZWB	AGCACCATGACTGATTGCTC	59.007	50	199	AGGCGAAGCTACAGGAGTG	59.858	57.895	468	422	(AC)^8	438	Dinucleotide
HMEZZP203FU4HR	AGGTGCAACGCTGGAAATG	59.786	52.632	49	GTCGCCTGCGCTTTCTATG	60.086	57.895	208	143	(AC)^10	163	Dinucleotide
HMEZZP203FU88A	GGGTGAATTCTCATGTGGAGG	59.116	52.381	60	CGTAGACCATTGCCATTCTAGC	59.949	50	303	204	(AC)^15	234	Dinucleotide
HMEZZP203FUJ88	ACAAGTACCTTTGGAATCATCCTG	59.523	41.667	92	CAGTGGGCCTCTTCTGGG	60.084	66.667	301	147	(AC)^11	169	Dinucleotide
HMEZZP203FUM2M	TTCCACGAGAACACGTTGC	59.428	52.632	5	GTTAACCGAGGTGCCAAGC	59.864	57.895	220	70	(AC)^8	86	Dinucleotide
HMEZZP203FUS9X	ACGTTTATATGCCACTTTGTACC	57.954	39.13	13	TCTGGTCCACCACTGAATTTG	58.904	47.619	315	226	(GT)^12	250	Dinucleotide
HMEZZP203FUUNX	CACCAGCATGGTTGCTGTC	60.158	57.895	49	GGGAAGGAGGAGTTCCCAC	59.775	63.158	321	231	(GT)^10	251	Dinucleotide
HMEZZP203FVU1D	AGATTTAGGGATGGACTGCG	57.841	50	248	TGGTGACTGCTTGGAAGGG	60.31	57.895	415	313	(GT)^8	329	Dinucleotide
HMEZZP203FVY5N	CATGAGCACTCCCTTGAGC	58.967	57.895	35	CGGGAACCGAGAAGAGGTC	60.232	63.158	374	129	(AC)^12	153	Dinucleotide
HMEZZP203FW5TZ	AGAAACAGGAGAGGATCAATCTG	58.42	43.478	76	AAACCCTACCTCGGCAACC	60.385	57.895	290	211	(GT)^23	257	Dinucleotide
HMEZZP203FWE4X	AAAGTGCTGGAAAGGCACG	59.712	52.632	84	GAACAAGGCTGCCCACATC	59.86	57.895	459	329	(CT)^9	347	Dinucleotide
HMEZZP203FX938	TGCATTTCCATGGGTTCTACTG	59.415	45.455	17	CGCGTTATACCCTAACTGTCC	59.009	52.381	185	132	(CT)^11	154	Dinucleotide
HMEZZP203FXYV7	TCCTTCCCTTGCCCAGAAC	60.003	57.895	49	CCGTGATGGAGTTGCGAG	58.938	61.111	265	177	(AC)^13	203	Dinucleotide
HMEZZP203FXZP1	ATCACCCAGAAGTCCCAGC	59.774	57.895	6	ATTGGCCTCACCACTGACG	60.758	57.895	166	70	(AT)^8	86	Dinucleotide
HMEZZP203FYB96	GCTTCATAGGGAATTGGTTATGGTC	60.536	44	138	TGTTCCCTGAACGAATGGC	58.808	52.632	359	241	(AC)^9	259	Dinucleotide
HMEZZP203FZKVB	TCAACCATCCACCTTGTTCAC	59.183	47.619	5	GCTGCAATACCTGCAAGGAAG	60.619	52.381	246	43	(GT)^17	77	Dinucleotide
HMEZZP203G0LP6	AACCAAACAGCCTTGGTGC	59.932	52.632	93	TACCCTGGTGGGACATCTG	58.766	57.895	450	234	(AC)^13	260	Dinucleotide
HMEZZP203G1F3O	ACCTAGATTTCTGTGCCTACATC	58.49	43.478	15	TTCGTTGGACTGGGCTCTG	60.383	57.895	237	95	(AC)^13	121	Dinucleotide
HMEZZP203G1NH7	GGTGGGTTCCACTTTGGTTG	60.008	55	38	AGGCCTGATAAGACCGCTG	59.931	57.895	396	173	(AG)^8	189	Dinucleotide
HMEZZP203G32PS	TCTTGGCACTGTATTGTGACTTC	59.7	43.478	10	TCAACTGCACAGAGGTTGC	59.039	52.632	240	118	(AC)^10	138	Dinucleotide
HMEZZP203G3974	AAATGGGCCACACTTCCTG	58.707	52.632	38	TGTTCTCTATTAAACTGAGCCTGC	59.592	41.667	276	177	(CT)^10	197	Dinucleotide
HMEZZP203G3E16	GCAGTCAGGAGTCATCTAAGC	58.93	52.381	149	AGTACAAACCGGAGAACAAGC	59.264	47.619	415	312	(GT)^8	328	Dinucleotide
HMEZZP203G3FLJ	ACAAGAGGAGTTGCTCAGGG	60.079	55	30	GCCCTGATGCCTAGTTTGG	58.953	57.895	356	106	(AC)^11	128	Dinucleotide
HMEZZP203G47BH	GCATACTTGATCCGTGCCC	59.419	57.895	36	ACACTGCTCAGATTCATTTCCC	59.418	45.455	211	71	(GT)^9	89	Dinucleotide
HMEZZP203G47UP	AAACGTAGCCTCATGCCCG	61.197	57.895	22	ACCCTCTCGAGCAATCGAC	59.935	57.895	254	102	(CT)^10	122	Dinucleotide
HMEZZP203G4FTO	ACTGTCTGGCCGTGATAGC	60.232	57.895	108	CAGCAGAACAGATGTGGGC	59.565	57.895	379	234	(CT)^8	250	Dinucleotide
HMEZZP203G4S8Q	GGTGCAAACGCTGGAAATG	58.917	52.632	50	CGTTGTGGAGTCCTGCTTC	59.202	57.895	239	143	(AC)^10	163	Dinucleotide
HMEZZP203G4THH	ACTGTCTGGCCGTGATAGC	60.232	57.895	108	CAGCAGAACAGATGTGGGC	59.565	57.895	380	234	(CT)^8	250	Dinucleotide
HMEZZP203G4XC5	GCCTGGAGGTAGTTGGCAC	61.131	63.158	9	AGGAAGGAAACAAATCTCAGCC	59.347	45.455	225	42	(GT)^9	60	Dinucleotide
HMEZZP203G58VS	GCATCATAAGCCTCTGCCTG	59.513	55	180	TAGGCAACCATTGCAGACC	58.492	52.632	380	323	(AC)^11	345	Dinucleotide
HMEZZP203G5KSF	TGCGCTACACCATAATAGGC	58.586	50	31	TATTGTGCCACCAACAGGG	58.405	52.632	191	67	(GT)^11	89	Dinucleotide
HMEZZP203G5LL2	AGGTCATGTTGCTTTGCCTG	59.794	50	8	GAGGCCACTGACTTTGTTCC	59.512	55	244	101	(GT)^10	121	Dinucleotide
HMEZZP203G5T2Q	ACGTAGAGATGCCACCCAG	59.553	57.895	152	GCTCCTGCAGTTGCCAAAG	60.453	57.895	351	231	(AC)^11	253	Dinucleotide
HMEZZP203G60JD	CTCTTTCATATCCTGCGGTGC	59.878	52.381	42	TACCCAGCTGTTGCGGAC	60.4	61.111	402	202	(AG)^9	220	Dinucleotide
HMEZZP203G65IZ	AGGGATGACTTGGAGGTGC	59.774	57.895	182	GCATCAGGCTCACCAAGGG	61.508	63.158	405	359	(GT)^9	377	Dinucleotide
HMEZZP203G6C5K	TGCAAACAACAAATAGAGCTTGG	59.141	39.13	26	TGCAGACTGTATAGGTAAAGGG	57.75	45.455	178	77	(GT)^8	93	Dinucleotide
HMEZZP203G6D2Y	TATTGCACCTAGGCTGTCC	57.263	52.632	0	CGGTAGCCTGTTTCTGCAC	59.572	57.895	260	74	(AG)^11	96	Dinucleotide
HMEZZP203G6YSE	AGCTGCTTCCCTAACAGCC	60.461	57.895	37	ACGTAAGACTTCATATCTGCGTTG	59.957	41.667	254	193	(GT)^10	213	Dinucleotide
HMEZZP203G7HJI	TCCCTTCTTTGCCTCCACG	60.384	57.895	204	TCACCAAAGGGCAGAACAG	58.337	52.632	462	379	(GT)^8	395	Dinucleotide
HMEZZP203G7J3Z	CCTTCTGCTCAGGTAGGGC	60.233	63.158	229	ACGCACCGTGATGCAAAC	60.088	55.556	464	418	(GT)^8	434	Dinucleotide
HMEZZP203G87TP	CTTGTAGAAAGAAGATCAAATGCAC	57.735	36	76	GGTATGCGGAGGCACAATC	59.419	57.895	424	126	(GT)^12	150	Dinucleotide
HMEZZP203G8HWK	GGAGGTCCCTTCCAGCTAC	59.549	63.158	4	GCGGGCTGACACCTAACC	61.177	66.667	337	154	(GT)^8	170	Dinucleotide
HMEZZP203G8LXM	GTGCTTGATCCTACCTGAGC	58.803	55	39	ACTCCATTTAACTGCCCTAGC	58.485	47.619	231	179	(GT)^8	195	Dinucleotide
HMEZZP203G9DY8	TGGACTGTTGTACTCCCTGC	60.079	55	37	TGTCAGGTTGCATACTTTGCTC	59.947	45.455	263	106	(AC)^9	124	Dinucleotide
HMEZZP203GBN1C	AGTGGATGCCCAGGAAGAC	59.774	57.895	36	TCCTGGAGATTTCCCAGCTC	59.566	55	268	206	(AC)^8	222	Dinucleotide
HMEZZP203GC245	CCTTCCACAGGGAATTAACCC	59.036	52.381	64	TGTTGTAATGGCAGCATCCC	59.287	50	405	141	(GT)^8	157	Dinucleotide
HMEZZP203GDYMG	GCAGGTGCCTAAGTTTATCTGG	59.816	50	47	CACCACCATCTGAACAGGC	59.187	57.895	269	154	(GT)^9	172	Dinucleotide
HMEZZP203GE6TK	CCCTCCTAAATTTGCCCTGC	59.647	55	17	AATGTCCAATCTGAACCACAAG	57.64	40.909	266	152	(AG)^12	176	Dinucleotide
HMEZZP203GF3QZ	AGGTCATGTTGCTTTGCCTG	59.794	50	8	CGAGGCCACTGACTTTGTTC	59.872	55	248	101	(GT)^10	121	Dinucleotide
HMEZZP203GFF2W	ATATTTCTATCCTGCTGTTTACCC	57.071	37.5	1	TTCCCACCACTGACCAAGG	59.927	57.895	350	51	(AT)^8	67	Dinucleotide
HMEZZP203GFKMG	TGCTTACATGGGTCGTCATTAG	58.968	45.455	25	GCCTGGGATTTGAGTCACC	58.878	57.895	187	67	(GT)^10	87	Dinucleotide
HMEZZP203GG7FR	CACATCTCCTCCGGGATCG	60.083	63.158	12	GCGCAGGTTCTAAAGGCG	59.936	61.111	189	119	(GT)^11	141	Dinucleotide
HMEZZP203GH6D8	TCCCACCTTGGCTACGTTC	60.082	57.895	53	TTGTAACCCGCCCTGAGAC	60.082	57.895	298	206	(AC)^12	230	Dinucleotide
HMEZZP203GH8X4	AACAGGCATTCTGCAGGTC	58.801	52.632	67	CTGGGACTATGTTGGGATGC	58.786	55	380	185	(AC)^14	213	Dinucleotide
HMEZZP203GHQBP	GTTGTGGGCGTTATGCTCG	60.303	57.895	203	CTAGGCAGAGTTGGAGGGC	60.233	63.158	365	298	(AC)^8	314	Dinucleotide
HMEZZP203GI8W3	TTTGTAATTTGCCCTAAGAGCTTC	58.503	37.5	117	TGACAGCTATAATTGTATCCCAGGC	61.298	44	266	187	(GT)^10	207	Dinucleotide
HMEZZP203GJCGN	CCATTATTCCCTCTCACGTAAAGC	60.253	45.833	37	ACTGCACTATTTATTGTACTGGC	57.692	39.13	187	71	(AC)^17	105	Dinucleotide
HMEZZP203GK9PC	CCCTTCCTGCAGCGATTTG	59.936	57.895	1	AATCTTCCAGTCCGTTGGC	58.502	52.632	230	128	(AC)^9	146	Dinucleotide
HMEZZP203GKAJY	CGAGGGATGTACAGGCTCC	60.008	63.158	12	CCCTCACTCCGGTTCCC	59.33	70.588	255	209	(CT)^8	225	Dinucleotide
HMEZZP203GKNBK	TTACTGTGGAGGCTCTGCG	60.158	57.895	7	TTAGTGCTCAGGTAGGGCG	59.555	57.895	404	255	(GT)^8	271	Dinucleotide
HMEZZP203GKPSD	GTTCTTGGTGGAGAATGGCTC	59.67	52.381	14	ATCGAGGTCCCGGTAAAGC	59.932	57.895	368	110	(GT)^8	126	Dinucleotide
HMEZZP203GKWMX	ATGTACCCGCATCCCTTGC	60.912	57.895	45	CAGGCATGCACACTATGGC	60.01	57.895	252	179	(AC)^9	197	Dinucleotide
HMEZZP203GKZLK	CACCTTCTCTGTGCTTGGAG	58.944	55	19	GATGCTGGCTTACGTGCAG	60.013	57.895	316	269	(AC)^9	287	Dinucleotide
HMEZZP203GLVBC	TCGCTTGGGTCCATCTTCC	60.157	57.895	192	AGATGTGTGAAAGGAAAGGCTG	59.616	45.455	376	297	(GT)^8	313	Dinucleotide
HMEZZP203GMTKF	GCTGTGGTCTGTAGAAAGCC	59.303	55	33	CTGATCTACGCAGCATTCGG	59.598	55	356	144	(AG)^8	160	Dinucleotide
HMEZZP203GN5C6	TGCACCAAGCACATTTCTCC	59.795	50	16	TGCAGGGAGGATTTAGTAGGC	60.007	52.381	208	52	(GT)^11	74	Dinucleotide
HMEZZP203GNFOT	CGCCCGGTCATTGTATTTGG	60.363	55	40	TGGAGACCCTGGCCCTATC	60.856	63.158	290	120	(AG)^9	138	Dinucleotide
HMEZZP203GNJLP	GTTGTGACCTGTCTATGCCC	59.013	55	40	TCCCTCCTTGTCCAAGTGC	60.004	57.895	226	109	(GT)^9	127	Dinucleotide
HMEZZP203GO09I	ATGCCACTCCCTGACCATC	59.85	57.895	32	GTCCTTGAGGAGCAGCTTG	58.892	57.895	474	376	(AC)^10	396	Dinucleotide
HMEZZP203GO6JA	AGCCTCCCTTCCACAAGC	60.003	61.111	91	TGTACTAAACACATTCCTGAAGC	57.569	39.13	453	273	(GT)^8	289	Dinucleotide
HMEZZP203GO846	CCAGAGCAGCTTAGTGAGG	57.989	57.895	6	ACTGGAAACAGAGGTGCCC	60.31	57.895	212	53	(AG)^13	79	Dinucleotide
HMEZZP203GOBFY	TCCATCACTGTGCAGATCC	57.581	52.632	84	CTGGAAGGACAGCTTTGGG	58.801	57.895	343	194	(AT)^8	210	Dinucleotide
HMEZZP203GOQ6Y	AGATTTAGGGATGGACTGCG	57.841	50	248	TGGTGACTGCTTGGAAGGG	60.31	57.895	415	313	(GT)^8	329	Dinucleotide
HMEZZP203GOTYZ	ACCCTTACCTGAACCAGCC	59.695	57.895	101	AGCTGAAGAATGGCTGCAAG	59.58	50	340	268	(AT)^8	284	Dinucleotide
HMEZZP203GQ01L	GGGCCCTCAGTCTCCATAG	59.318	63.158	78	CCAGGAAGCAGCAGTATTTGG	60.011	52.381	401	354	(AC)^8	370	Dinucleotide
HMEZZP203GQ2G4	TGAAGAAACTTCTCCTGTGGC	58.911	47.619	16	AGTGCCCTACAGACCCAAG	59.39	57.895	320	51	(GT)^9	69	Dinucleotide
HMEZZP203GQWKT	ACTGATGGGAGTTGGAGACC	59.493	55	72	GGTGGCAAATATGTTTAGTAGTTTGG	59.738	38.462	242	157	(AC)^16	189	Dinucleotide
HMEZZP203GR0OW	GGGTACTGACCCGGATAGG	59.017	63.158	127	TTAGACCTGCCCTGCAAGC	60.762	57.895	348	195	(GT)^11	217	Dinucleotide
HMEZZP203GS422	CTGCAGCTTATCAGAGGGC	58.741	57.895	103	CACCCACTCCCAGTAGAACC	60.151	60	309	237	(CT)^8	253	Dinucleotide
HMEZZP203GSMDM	GTGCTATAGGTGTTGGATCACG	59.628	50	9	GAACTTCAGGGTGAATATGCTG	57.866	45.455	159	51	(GT)^11	73	Dinucleotide
HMEZZP203GT4PI	TCTGCCACAGTCCCTTCAC	60.006	57.895	78	GTGACTCCCTCCAGATGCC	60.233	63.158	411	120	(CT)^9	138	Dinucleotide
HMEZZP203GTR0J	AACCAAACAGCCTTGGTGC	59.932	52.632	93	GGTGCTACTTGAGCTTTACTCC	59.494	50	327	234	(AC)^13	260	Dinucleotide
HMEZZP203GU3DY	TCTCACCTATGAGTTGATAGTAGCC	60.012	44	35	CTGCGCAAATTTCATAGTGC	57.11	45	241	124	(AC)^8	140	Dinucleotide
HMEZZP203GU3NI	AGTGCCCAACGTTCTACCC	60.384	57.895	22	CGAAGGAAACTCATAGACCAACC	59.827	47.826	225	106	(GT)^9	124	Dinucleotide
HMEZZP203GU6O1	GGCTAGCGCAGTTCAATGG	60.012	57.895	76	CCTGGAGCTGGTTGTTTGC	60.083	57.895	319	111	(AC)^12	135	Dinucleotide
HMEZZP203GUHOC	CACGCTGCCAAGAAACCAG	60.451	57.895	177	GACCGAGGGTCTAGCTTTG	57.999	57.895	333	234	(AC)^9	252	Dinucleotide
HMEZZP203GUIHB	AGCACCAAGCACATTTCTCC	59.507	50	17	GGAGATTTAGAGGCGCGTTG	59.805	55	202	53	(GT)^11	75	Dinucleotide
HMEZZP203GV490	TCTGGCGAACTTCCATTGC	59.19	52.632	73	GTGAAATTCCTCCAGGTGCC	59.579	55	364	260	(AG)^8	276	Dinucleotide
HMEZZP203GVVPG	TTGTGGTGCCAGCAATGAG	59.408	52.632	159	AGCAGGAAGATGGAATAGTGC	58.56	47.619	430	315	(GT)^8	331	Dinucleotide
HMEZZP203GVZCV	ATAAGGCTTCCGCTTTCCC	58.26	52.632	65	GCTCCCAGCATTTCAGCAC	60.232	57.895	382	117	(AC)^9	135	Dinucleotide
HMEZZP203GWRB4	GGAAGAAAGTCTCAAGCGGTG	59.946	52.381	33	AGAATCCAGAGGAACCCTGC	59.859	55	340	184	(AG)^14	212	Dinucleotide
HMEZZP203GWT4U	GTGGTGGTCTGAACGGG	57.859	64.706	182	CTGGACCATGACTCTTGTTGG	59.328	52.381	389	275	(AC)^8	291	Dinucleotide
HMEZZP203GX7L4	GGTGGCACATTTGTCATGC	58.61	52.632	20	AGGTGCTTCCACACCCTTC	60.31	57.895	208	56	(AC)^8	72	Dinucleotide
HMEZZP203GXKTL	TTTGAGCCCTGACACTCTG	57.737	52.632	80	CAGGCTAGACTTATGCAGAACC	59.297	50	300	200	(AC)^18	236	Dinucleotide
HMEZZP203GXMGM	AGAGAACGATTGCTAAATCAAAGC	58.886	37.5	17	GAATGACGGCCTAGCAACC	59.345	57.895	307	54	(GT)^8	70	Dinucleotide
HMEZZP203GXPWG	ACCAGGACAAGGGTTGCTG	60.614	57.895	126	GTGGACATGTGCGCTTTGG	60.814	57.895	372	250	(AC)^8	266	Dinucleotide
HMEZZP203GY714	GGAGCATGAAGGAGCCAAG	58.958	57.895	56	AGACAGCTTATTTCACGACGC	59.748	47.619	314	116	(CG)^8	132	Dinucleotide
HMEZZP203GYN5S	AATATGCAACCTCGTGCCC	58.957	52.632	124	CACTGCACCAAACCAGGC	60.008	61.111	483	179	(GT)^8	195	Dinucleotide
HMEZZP203GZ2HQ	CCTCAGAGTGGGCCTGATG	60.233	63.158	75	TGCACTAACGGTGAGCCAG	60.753	57.895	353	123	(AC)^12	147	Dinucleotide
HMEZZP203GZXMP	TTACTGTGGAGGCTCTGCG	60.158	57.895	7	GAAGCCGCATGATCGAAGG	59.794	57.895	455	255	(GT)^8	271	Dinucleotide
HMEZZP203HBGOP	TCCTTGTGATTCCACCTAGCC	60.215	52.381	1	TCATAGGAATGGCCGTGGG	59.928	57.895	262	208	(GT)^11	230	Dinucleotide
HMEZZP203HDPNZ	GCACCATTTCACCAGGCTC	59.86	57.895	210	AGGACGATAATGCTGGCAC	58.361	52.632	389	315	(GT)^8	331	Dinucleotide
HMEZZP203HDWXS	AGGTCATGTTGCTTTGCCTG	59.794	50	8	ACCTGAGGCCACTGACTTG	60.005	57.895	248	101	(GT)^10	121	Dinucleotide
HMEZZP203HE0SN	CGAGGGATGTACAGGCTCC	60.008	63.158	12	GCTGAGGAAGTATAGAGCACG	58.738	52.381	288	211	(CT)^8	227	Dinucleotide
HMEZZP203HEG44	CCCGTCTACTTTCCAGGGC	60.533	63.158	64	ACAATCTCCCTGAGGCACC	59.774	57.895	266	184	(GT)^11	206	Dinucleotide
HMEZZP203HESC2	CCTGTTATGGTGAGCTTTGC	57.817	50	2	AGACTCCCACTAGGAAGGG	57.742	57.895	167	53	(AC)^8	69	Dinucleotide
HMEZZP203HF9OI	AATGCCTTCCAAGCTGTGC	59.782	52.632	53	ACAGCGGCTTCAGTATGGG	60.533	57.895	427	95	(GT)^8	111	Dinucleotide
HMEZZP203HFCQF	TCCAGGACTTACTCTAAGCAGAC	59.757	47.826	99	GCATGCCACTAACATTAACTGC	59.31	45.455	406	326	(AC)^8	342	Dinucleotide
HMEZZP203HFLZ6	AGCAGAGAAGGCTGTGAAAC	58.865	50	41	CAACTCAGGTTGAAATGTCTGC	58.856	45.455	232	96	(AC)^9	114	Dinucleotide
HMEZZP203HFNC2	GGCAAGCCTCCTATCACATTAAG	59.95	47.826	69	ACAGCAAAGATACTCACTAAGAGG	58.801	41.667	221	125	(AT)^10	145	Dinucleotide
HMEZZP203HFTKA	GCAGTCAGGAGTCATCTAAGC	58.93	52.381	149	AACAAACCGGAGAACAAGC	57.102	47.368	413	312	(GT)^8	328	Dinucleotide
HMEZZP203HGBSJ	TCCACAGAAAGCATCTTCAGG	58.701	47.619	10	AGGGTTAGTCCTAGAAAGCCC	59.302	52.381	242	46	(AC)^12	70	Dinucleotide
HMEZZP203HGLS6	GGATTGGACTTCGTGCCTG	59.27	57.895	293	GGAGAGACGGTGTTCCTGC	60.824	63.158	453	403	(AG)^9	421	Dinucleotide
HMEZZP203HGUAU	GAAGACATGGCTGCTTCCC	59.261	57.895	24	ATGTTTGCCACCCTTCGTG	59.409	52.632	200	91	(AC)^9	109	Dinucleotide
HMEZZP203HGVD6	TCATAAACCTATCAGGGTTCTTGC	59.341	41.667	94	ATTTGATCAGAAGGCTGACATAG	57.168	39.13	341	286	(AT)^8	302	Dinucleotide
HMEZZP203HHA8O	TTTGTAATTTGCCCTAAGAGCTTC	58.503	37.5	117	CAGCTATAATTGTATCCCACGGC	60.076	47.826	266	187	(GT)^10	207	Dinucleotide
HN7TS9H02C004H	CTCGAACCTGTGGGATTTGC	59.941	55	70	GCACCAGCTCCAACTTCTTG	60.152	55	445	247	(CT)^8	263	Dinucleotide
HN7TS9H02C066N	CCAAGCTCTTGCACTGACC	59.491	57.895	12	CCTAAAGCGAAGGCTGGAC	58.972	57.895	397	175	(AT)^8	191	Dinucleotide
HN7TS9H02C08DQ	TCTGTGCCAAACTGCCATC	59.106	52.632	317	TACTGGGCAGTGGAAGCTG	60.081	57.895	621	470	(AG)^8	486	Dinucleotide
HN7TS9H02C0IHL	ATTAGGGTTACCTCTGTAGCG	57.386	47.619	15	ACATTGTACTGCATGGACGAG	59.131	47.619	210	126	(GT)^10	146	Dinucleotide
HN7TS9H02C0RL0	AACTGCCACAGGTACAGGG	60.004	57.895	123	GACCAACAATTAACACTGGCTG	58.852	45.455	537	482	(GT)^9	500	Dinucleotide
HN7TS9H02C0ZGC	GGGCTGCAGTTTCCATCAG	59.561	57.895	57	TCTCTCACTCTGAAGTGGTTG	57.743	47.619	262	180	(AT)^12	204	Dinucleotide
HN7TS9H02C1FGC	GGGACTCATTGCAGCGAC	59.238	61.111	368	GCATGCAACTTTCCTAGTCC	57.531	50	683	624	(AC)^13	650	Dinucleotide
HN7TS9H02C1IJN	GACCTCTTGCCATGTCCAC	58.887	57.895	235	CCTGTTGCAATCTTCTAGGGC	59.738	52.381	422	301	(AC)^9	319	Dinucleotide
HN7TS9H02C1TB1	GGCCATCATTCTACAGTGGC	59.44	55	18	ACAGATTGGAGGGAAGGTCG	59.862	55	204	114	(GT)^14	142	Dinucleotide
HN7TS9H02C1VZZ	CTCTTGGCATGTCCTTGCG	59.938	57.895	23	CAGAACGTGGTACATGCGG	59.65	57.895	284	239	(AC)^8	255	Dinucleotide
HN7TS9H02C1YM7	TGATCATGCTGTCCCTGCC	60.536	57.895	62	CAAAGTTGGTGGCCCTGTC	59.709	57.895	369	255	(AC)^8	271	Dinucleotide
HN7TS9H02C1ZAI	CTAAAGGCCACTTGCAGGG	59.18	57.895	83	GCCACAGCCCATTTAGTCC	59.257	57.895	276	197	(AG)^8	213	Dinucleotide
HN7TS9H02C1ZIC	AGATCCATGAAATGAAGGAGGC	58.945	45.455	51	GCCTTTCTGTTTCTTACAGTTGC	59.462	43.478	378	211	(AG)^9	229	Dinucleotide
HN7TS9H02C20UW	AGTATGGTCCTAAGGTGCTTTAAC	59.036	41.667	25	AGTGCCAGAATGGAGTAGGG	59.566	55	398	73	(AT)^8	89	Dinucleotide
HN7TS9H02C237O	TGGATGCTTTCAACTGAATCTGG	60.011	43.478	9	CACCTTGGCATTCCTGTGC	60.158	57.895	388	177	(AC)^11	199	Dinucleotide
HN7TS9H02C2CYX	GTAGCAGCTCAGGGAAAGC	58.969	57.895	26	TTAGATGGGTCGTGGCCTG	59.854	57.895	419	132	(AG)^9	150	Dinucleotide
HN7TS9H02C2DW7	ACCACTCCTACCTCCAGGG	60.39	63.158	31	CAGCCCAGGTACAGCGTG	61.172	66.667	285	161	(GT)^13	187	Dinucleotide
HN7TS9H02C2G9R	AGAAAGTGCAGCTATGGAGG	58.055	50	34	GAACATGAGTGCCAGACGC	59.94	57.895	351	225	(CT)^12	249	Dinucleotide
HN7TS9H02C2I6P	TTTGCAACATCCTCGGCAC	59.787	52.632	56	ACCCAGAGTTCTCACGCAG	60.083	57.895	487	335	(AG)^10	355	Dinucleotide
HN7TS9H02C2OQD	CCATGGCTCTCCTTACATACC	58.355	52.381	36	TGGGTAATCATTTGGACCCAG	58.396	47.619	422	221	(GT)^11	243	Dinucleotide
HN7TS9H02C2TAN	CGTGGGCTTTCTTACCTCC	58.591	57.895	98	CCGCCTTCTGATTCTTGGG	58.962	57.895	310	243	(AC)^11	265	Dinucleotide
HN7TS9H02C2UB2	AGGCTTGCTTATGCGACAG	58.97	52.632	53	GGTGCAGACTACGGCAGG	60.863	66.667	228	153	(AG)^8	169	Dinucleotide
HN7TS9H02C2WO4	AAAGCTTCTGAGCAGTTACATC	57.47	40.909	2	CGCACTTCCTCTGCCATAC	59.054	57.895	190	65	(AC)^11	87	Dinucleotide
HN7TS9H02C2XGN	TGCTCCCTTCTTCTGAGCC	59.777	57.895	36	GGTGAAATTGATTGGAAGCCG	58.868	47.619	368	259	(AC)^11	281	Dinucleotide
HN7TS9H02C2Z5N	GCACCCAGATGATTGGTTTAGG	60.076	50	45	GGCCGCTTTAACTGCCAAG	60.525	57.895	431	111	(AC)^13	137	Dinucleotide
HN7TS9H02C32W6	GAACCTTGCAGGACTCCAC	58.813	57.895	297	ACTGCATTGGATTGGTCAGAAG	59.681	45.455	594	428	(GT)^9	446	Dinucleotide
HN7TS9H02C36ON	GCAAGTCAGAAAGGCTGGAC	59.87	55	66	TACAGCCGATGGTAGCAGG	59.63	57.895	466	137	(GT)^14	165	Dinucleotide
HN7TS9H02C3DPX	CAACGATCACGTGCTTCCC	59.941	57.895	264	GTTCTACAAGTGATACATGAAATGC	57.567	36	617	535	(AC)^8	551	Dinucleotide
HN7TS9H02C3FZA	TCCAGTCCAGAAAGGGCTC	59.39	57.895	36	ATACGGGTCACCTCATGGC	59.93	57.895	325	180	(AC)^8	196	Dinucleotide
HN7TS9H02C3GTW	CCTGTCTGCCATCAAATCCAC	60.011	52.381	279	CTGGCGGGTAGAATGCAC	58.92	61.111	454	406	(AC)^9	424	Dinucleotide
HN7TS9H02C3II7	AGCTTGCTTGTGCAATGGAG	60.152	50	92	ACAATCCCACCTCGAAGCC	60.46	57.895	403	335	(AC)^13	361	Dinucleotide
HN7TS9H02C3KC2	GGGACAGAAGTGCATTTGG	57.242	52.632	64	GGCCTGATTGATCCTGCAC	59.336	57.895	372	94	(AC)^8	110	Dinucleotide
HN7TS9H02C3L8A	CAGGCACCAACGCAGTATG	59.938	57.895	393	GTCCCTTCACACCAAGATCC	58.642	55	584	498	(AT)^9	516	Dinucleotide
HN7TS9H02C3MIV	ATGCACACCGGGAATGAAG	58.879	52.632	181	GCAAGTGATGCAATGTGAGC	59.109	50	437	259	(AC)^8	275	Dinucleotide
HN7TS9H02C3QE8	AGGCTCACTTGGGACCTTG	60.004	57.895	148	TTGCCTAAATGCTCGGGTC	58.581	52.632	460	321	(AT)^11	343	Dinucleotide
HN7TS9H02C3W0P	CACCATTTGACAGGCAGGG	59.482	57.895	11	TTGAAGAACTACTAGAGGCCG	57.613	47.619	282	220	(AG)^14	248	Dinucleotide
HN7TS9H02C42HP	TGGAAGCAGTAATGGGCTG	58.182	52.632	158	CCAGCCTCTAGCATCTTTGC	59.443	55	557	318	(CT)^8	334	Dinucleotide
HN7TS9H02C45JD	CCTCCACCGAGCATTTGTC	59.27	57.895	207	TGACAGGGAGGATGTCTGC	59.472	57.895	461	338	(CT)^9	356	Dinucleotide
HN7TS9H02C4BJL	CACTCAGTCCAGCACCCTG	60.756	63.158	196	TGGCCCAAGGACCACATTC	60.693	57.895	398	278	(GT)^8	294	Dinucleotide
HN7TS9H02C4FG4	AAATGTCGTTGGCCCTTCC	59.101	52.632	427	GGAAGTGTACTGCACAGTCG	59.317	55	698	533	(AG)^17	567	Dinucleotide
HN7TS9H02C4H4C	GGCTAAACTCCAAACAGGCG	60.223	55	328	TCCGTCCCTGTGCTTCTTG	60.383	57.895	525	430	(CT)^8	446	Dinucleotide
HN7TS9H02C4P7I	TCCGGTTTCATTGGAAGGC	58.799	52.632	13	TGTTGGTGTGAATAGGCAGTC	58.982	47.619	295	108	(CT)^8	124	Dinucleotide
HN7TS9H02C5EWL	CCCTTTGGGCAACCACTCC	61.672	63.158	64	CCTGGAGGTCCCTTCCAAC	60.081	63.158	289	212	(AC)^11	234	Dinucleotide
HN7TS9H02C5PRQ	CTGGAGCTGTACACTTTCCTTC	59.428	50	49	TGCAGTGGCCTTATGCTATAC	58.636	47.619	365	188	(AC)^13	214	Dinucleotide
HN7TS9H02C5Q6G	CTTCACCCGAAGGTCCCAG	60.458	63.158	135	GCTGCCACTGTTCTTCACG	60.158	57.895	448	382	(GT)^13	408	Dinucleotide
HN7TS9H02C5UEY	GGTGAAGCTGAGAAGCCAAG	59.585	55	85	CGGCAGATGCCAAGGTAAG	59.343	57.895	284	198	(AC)^10	218	Dinucleotide
HN7TS9H02C5USF	AAAGTGCCACGCACGTATC	59.573	52.632	184	CAAGGCATTACCTGGGAGC	58.953	57.895	492	357	(GT)^11	379	Dinucleotide
HN7TS9H02C5ZBW	CTCTCAGCTCCTAGCACCG	60.01	63.158	175	TAGTTCAACACGAGGGCCG	60.455	57.895	483	398	(AC)^12	422	Dinucleotide
HN7TS9H02C6CET	CCAGCCAGAAGATGAGCAC	58.967	57.895	90	TCCTGAGTATTCATAAGCCCG	57.733	47.619	449	387	(CT)^10	407	Dinucleotide
HN7TS9H02C6I9P	CAGGCACTAGCCAAATGGTC	59.654	55	101	AATAGTGCTCACAATCAGTGC	57.36	42.857	345	143	(AC)^16	175	Dinucleotide
HN7TS9H02C6JMC	CTCTTCACCCTTGCTCATTGG	59.669	52.381	15	TCCCTGGAAGGAACAGACAAG	60.076	52.381	422	56	(AG)^8	72	Dinucleotide
HN7TS9H02C6OFP	GGCTTATGCTGCTCAAGTGG	60.011	55	158	CACTGGGTCAGTCTCCCG	59.771	66.667	399	201	(GT)^8	217	Dinucleotide
HN7TS9H02C6RGG	GAATAAGGCCCAGTGCAGAC	59.369	55	49	AGCACACGGCTGTTGTAAG	59.123	52.632	245	184	(AC)^14	212	Dinucleotide
HN7TS9H02C6VVJ	TGCTCAGAAGAATTAGTGCTGG	59.16	45.455	14	ATCGAGTGGACCTGTCTGC	59.858	57.895	230	74	(GT)^8	90	Dinucleotide
HN7TS9H02C6W6X	TGGACCCACTGATCCCAAC	59.696	57.895	76	AGCATCCCAGGAATCCCAC	59.848	57.895	290	228	(AC)^10	248	Dinucleotide
HN7TS9H02C6ZUF	TGCCCTGACCTCTGATTGG	59.774	57.895	29	TGGGCTCCCAAGTCTTCAC	60.004	57.895	283	64	(AC)^8	80	Dinucleotide
HN7TS9H02C7239	ACTCCTAGTAATATCTGTAAGTGATGC	58.984	37.037	153	CTGCAGCAAACCGTACTCC	59.572	57.895	473	242	(GT)^12	266	Dinucleotide
HN7TS9H02C726S	GCTTACCAGTATGCAAGGC	57.114	52.632	30	TGCAGGGTGGTAGCACAG	60.005	61.111	355	69	(AG)^9	87	Dinucleotide
HN7TS9H02C765W	TTTGGCCTCCCTGGACATC	60.08	57.895	336	GTCGCTAAACACCTCTGCG	59.653	57.895	535	409	(CT)^8	425	Dinucleotide
HN7TS9H02C7EXA	GTCCTTCCTTTACACAAGTCTCC	59.449	47.826	11	CCTAGCGAACCTTAGGCG	57.997	61.111	226	143	(GT)^10	163	Dinucleotide
HN7TS9H02C7X9F	GGAAGAGAGCTCCCAGAAGG	59.935	60	196	TACAGCTTACCTTGCCAGC	58.2	52.632	412	238	(GT)^8	254	Dinucleotide
HN7TS9H02C88RI	CTGAGGTGTTGGAGCAAGC	59.491	57.895	230	GGTATCCCTACTGTTTCTAAAGGTG	59.43	44	450	372	(AC)^14	400	Dinucleotide
HN7TS9H02C8BOF	TGCCTTCCAGACAATGCAG	58.802	52.632	193	GATCTATGCGCTGAAGCCG	59.578	57.895	489	306	(AC)^12	330	Dinucleotide
HN7TS9H02C8CND	GCCTGTGGGTTGGCTAATTC	59.938	55	279	CTACCCACTCCCTACGTCTG	59.365	60	429	337	(AC)^15	367	Dinucleotide
HN7TS9H02C8EA0	GGGTTTAGGGTCAGGTGATAC	58.211	52.381	36	CTGTTACCTTTGGGCGCAG	59.863	57.895	392	77	(GT)^9	95	Dinucleotide
HN7TS9H02C8NZ4	GGACATGACTTCCTTGTAGAACC	59.512	47.826	219	ATAGCTTGGCAGGAAGAGC	57.959	52.632	616	512	(GT)^9	530	Dinucleotide
HN7TS9H02C8SFG	AGTATGGTCCTAAGGTGCTTTAAC	59.036	41.667	26	AGTGCCAGAATGGAGTAGGG	59.566	55	401	74	(AT)^8	90	Dinucleotide
HN7TS9H02C8WNH	TGCAGTTTCAAGCAGTGGC	60.009	52.632	143	TGCATTCGGTCTATCTTTGCAG	59.819	45.455	478	270	(GT)^10	290	Dinucleotide
HN7TS9H02C9155	CAGAGGTAACATTCTGCAGCC	59.741	52.381	74	TCCTTCCTGAAGTACCCGC	59.475	57.895	494	137	(AC)^13	163	Dinucleotide
HN7TS9H02C93QB	GAAAGCAGTCAAGTCCCAGC	59.87	55	275	CTTTGTGCAGTGGCGAAGG	60.451	57.895	507	319	(AC)^11	341	Dinucleotide
HN7TS9H02C9671	TCCATGGGAATGGGCACC	60.082	61.111	19	TGCACAAGAGTGCTGTTGAC	59.729	50	439	365	(CT)^11	387	Dinucleotide
HN7TS9H02C98EO	TTTGTGGCGCACCCTTTAG	59.411	52.632	48	TGCCAAGACTTCCCTCGTG	60.383	57.895	309	119	(GT)^10	139	Dinucleotide
HN7TS9H02C9DOL	GGTTACAGCAAACAGGTCTAGC	60.013	50	201	GATGGGAGATCTGCATTGGG	58.854	55	523	331	(AC)^9	349	Dinucleotide
HN7TS9H02C9E72	ACACTGACATGAGGAGACCC	59.497	55	0	TGTGGTGTGAACGCACTTG	59.643	52.632	446	157	(GT)^14	185	Dinucleotide
HN7TS9H02C9EIJ	CCATGCAGAAACTCACCTGC	60.223	55	113	GACCTATAGCGTGCTTTGGC	59.803	55	352	243	(GT)^8	259	Dinucleotide
HN7TS9H02C9TBC	GCCTTCCTTGAGTTTGCCC	59.783	57.895	107	AGCCCATCTGCTTTCTGTTAAG	59.418	45.455	521	460	(AG)^10	480	Dinucleotide
HN7TS9H02C9YQC	AATGCCAGAGGCAACATCG	59.262	52.632	306	AGGGAGTCTATGTCTGACGG	58.703	55	492	349	(GT)^9	367	Dinucleotide
HN7TS9H02CW7VE	ACACACCAGGGTGGCATAG	60.081	57.895	222	AACCCTAACCCTACGACCG	59.174	57.895	472	372	(GT)^19	410	Dinucleotide
HN7TS9H02CWUZZ	AAGCTGCTGCAAAGGCAAG	60.381	52.632	206	CTCGGTGACGTTTAGTTCAGC	60.016	52.381	496	349	(GT)^10	369	Dinucleotide
HN7TS9H02CWXKM	AGGTTGACCCAAACTTCCC	57.925	52.632	14	CATGTGTGGAAGGCACAGG	59.487	57.895	443	184	(AT)^9	202	Dinucleotide
HN7TS9H02CX617	CTTCCGCACAAAGAAATGCG	59.397	50	80	AGTGCTTCCCTGAAGTGGC	60.688	57.895	249	121	(GT)^8	137	Dinucleotide
HN7TS9H02CX61T	TGCAAGCATGGAATGACCAC	59.866	50	126	TCACACGTTTGTCTCTTCTACAG	59.148	43.478	402	322	(GT)^13	348	Dinucleotide
HN7TS9H02CX66B	ACTGTGAGACCTCATGCTG	57.517	52.632	13	ATGCTCTGGGACTTTGCAC	58.801	52.632	213	95	(GT)^8	111	Dinucleotide
HN7TS9H02CX9JL	CTGCATTTGCCTGTCCCAC	60.158	57.895	332	CAATTGAGCCTCCACGCTG	59.938	57.895	533	479	(AT)^8	495	Dinucleotide
HN7TS9H02CXADH	CAGCATCCATGAGACTTGCG	60.083	55	374	CATCCCAACACCCTCTCGG	60.533	63.158	644	404	(AC)^11	426	Dinucleotide
HN7TS9H02CXQL0	AAACAATGGCGCAAGGAGC	60.454	52.632	135	TGACAATGCTAACAACTCCCAG	59.355	45.455	493	347	(AC)^9	365	Dinucleotide
HN7TS9H02CXQUO	CTCCGTAGCTTTGCGGAAG	59.356	57.895	51	ACTGTGGTTGGCACTTTACG	59.444	50	230	163	(AG)^14	191	Dinucleotide
HN7TS9H02CXXBY	AGTTCTGGTTCCTCTGCCG	60.082	57.895	21	GTGCCAAGCCACAATCTCC	59.86	57.895	359	87	(GT)^8	103	Dinucleotide
HN7TS9H02CY2IU	TCCCTTCTCAACCTTTCAGATAC	58.354	43.478	267	CCTCATACAGCTACTTGCTAGAC	58.894	47.826	456	373	(AC)^8	389	Dinucleotide
HN7TS9H02CY6LZ	ACACTGACTGGACACTAGGAAC	60.141	50	200	TCAACCAGACAGCAAATGTCC	59.531	47.619	385	323	(AT)^10	343	Dinucleotide
HN7TS9H02CY7UL	GCGGACTGGTTAGTTGCAC	59.866	57.895	131	ACTCTTGCTGCACTGGAAATAG	59.422	45.455	374	274	(AC)^12	298	Dinucleotide
HN7TS9H02CY8EA	TCTGTGCAGTGCCATTTCTG	59.511	50	227	TGTTCAGTTTAATGTGGATGGC	57.98	40.909	614	520	(AC)^13	546	Dinucleotide
HN7TS9H02CZ3H9	GGTGTGTGACAAGAGGTGG	58.739	57.895	259	GTGGTGCAGGCCAGATTAC	59.264	57.895	677	336	(GT)^10	356	Dinucleotide
HN7TS9H02CZHNY	TTGCGGTCCTTTCTCCTTG	58.428	52.632	142	CCCTCAATGGATCCCAGTCC	60.297	60	522	195	(GT)^8	211	Dinucleotide
HN7TS9H02CZHQ7	TTTACAACTTGACTTCCTGTGG	57.252	40.909	113	CTCCCAAGGAGGAAGCACC	60.461	63.158	347	158	(AC)^14	186	Dinucleotide
HN7TS9H02CZIOH	AGGGCATCCACCAGCATAG	59.927	57.895	136	CTGTCTGGACGGTAGCCAG	60.232	63.158	541	176	(AC)^8	192	Dinucleotide
HN7TS9H02CZQNP	ACCACCCTCGAAGAAATCTG	57.989	50	200	ATGTCCTGTGCAGAAAGGC	58.801	52.632	473	325	(AG)^8	341	Dinucleotide
HN7TS9H02CZYQ9	GCCGTTCGTAACCCAAACC	60.158	57.895	198	CCATGCAGGCAGTGGAAAG	59.859	57.895	524	446	(CT)^11	468	Dinucleotide
HN7TS9H02D06DC	GGGACCCATGTGGAAAGGG	60.77	63.158	69	ATACAGCGGGAGGACCTTG	59.549	57.895	277	180	(AT)^9	198	Dinucleotide
HN7TS9H02D08Q4	GACAACTTGACCAAAGTGATGC	59.116	45.455	74	CATCTGGCCACCCTTCCTG	60.839	63.158	251	136	(GT)^9	154	Dinucleotide
HN7TS9H02D0B4W	AAAGTCGCAAAGATGGCAG	57.261	47.368	25	TGTGCAGGACTCCGTAAGC	60.455	57.895	187	58	(AC)^11	80	Dinucleotide
HN7TS9H02D0EKN	GGAAGAGAGCTCCCAGAAGG	59.935	60	197	CACCAGTGGCCATTTCCAG	59.482	57.895	598	239	(GT)^8	255	Dinucleotide
HN7TS9H02D0G5X	GCCATCTGGAATGGTGCTC	59.336	57.895	272	GGAAGAGCAGAGCTTCGTG	58.985	57.895	552	343	(GT)^10	363	Dinucleotide
HN7TS9H02D0GGI	TCTCAAGGGACAGGCAACC	60.004	57.895	62	GTCTGGGTTCCTGAATGCG	59.27	57.895	313	245	(AC)^10	265	Dinucleotide
HN7TS9H02D0GRD	GTGTAAACAGAGGAGGTAAGGC	59.164	50	2	TGCTATCGTGGACCTATGGC	60.08	55	449	129	(AC)^10	149	Dinucleotide
HN7TS9H02D0NCT	TGTGACTCCACCATAAGCG	57.913	52.632	13	CCACCTCAGACTGCATTACG	59.098	55	410	89	(AC)^9	107	Dinucleotide
HN7TS9H02D0PQJ	ATCATGAGAGCCGGACACG	60.306	57.895	243	GGTGGGCGTCCTTTGGAG	61.107	66.667	525	422	(CT)^9	440	Dinucleotide
HN7TS9H02D0V44	CCTAGAAGGCTCAGGGCAG	59.93	63.158	160	CGTTTCACAGCATCCAGGC	60.231	57.895	511	447	(AC)^14	475	Dinucleotide
HN7TS9H02D0X26	AATTTGGGACGCAAGCACC	60.083	52.632	336	GCTGCAGACCCTTCAAACG	60.158	57.895	750	654	(AC)^9	672	Dinucleotide
HN7TS9H02D18S9	GTGTCGTTGAAGCAGACGG	59.87	57.895	119	TCTTCTGATCACAGCTTTACTTCC	59.289	41.667	348	174	(AG)^8	190	Dinucleotide
HN7TS9H02D1GAI	TCTCCAGTTCCCTTACCGC	59.475	57.895	242	ACTGGACAGATTGATATCCCTG	57.805	45.455	604	511	(GT)^8	527	Dinucleotide
HN7TS9H02D1N3H	CACTGAGCTGGTTCTGAATGG	59.672	52.381	21	TGCTGTGCCTGGTTCAAAG	59.333	52.632	340	140	(AC)^8	156	Dinucleotide
HN7TS9H02D1P7Q	AGTCGTGCATGCCTAACTC	58.299	52.632	207	TTTGATCCTCCCAGGTGCC	60.08	57.895	449	324	(AC)^8	340	Dinucleotide
HN7TS9H02D1VL5	GCTTAATGAGAGCACCTTAGGAAAC	60.704	44	145	TCTTCTGACACTACAGATGCC	57.883	47.619	365	204	(AC)^16	236	Dinucleotide
HN7TS9H02D1W05	GACCAGCGCCTTATTGCTC	59.718	57.895	221	TCTTCACCTTCTCCGTTGGG	60.079	55	549	458	(AC)^12	482	Dinucleotide
HN7TS9H02D2049	TGGTTCCTGGCCATTGGAG	60.387	57.895	40	CTGTGCAGCCAGAGCATTC	59.937	57.895	394	213	(GT)^10	233	Dinucleotide
HN7TS9H02D2052	GGGCTGATCTTCAGTTTAGTGG	59.489	50	125	AGATGGTGGGCCAATCCTG	60.157	57.895	544	253	(GT)^8	269	Dinucleotide
HN7TS9H02D28RJ	CCTGCCTGTGAATCTGTTCC	59.296	55	54	TCGGTTACGTATGGCAGCG	60.961	57.895	214	116	(GT)^8	132	Dinucleotide
HN7TS9H02D2D9N	GCCCATGTATCTCGAACAGC	59.521	55	293	TCCTGTTTGCACTGTGATGC	59.797	50	490	436	(CT)^8	452	Dinucleotide
HN7TS9H02D2EXS	GCACCCAGATGATTGGTTTAGG	60.076	50	45	GGCCGCTTTAACTGCCAAG	60.525	57.895	431	111	(AC)^13	137	Dinucleotide
HN7TS9H02D379E	GGGTGATGAAGAACCAAGCC	59.579	55	161	TTGTTCAGGAGTCAGCCAC	58.046	52.632	482	299	(AC)^10	319	Dinucleotide
HN7TS9H02D37J1	TGATAGAACTGTGGCATTCTCC	58.625	45.455	43	TTCCTATCCACTTTGTTCACATC	57.295	39.13	319	85	(AC)^8	101	Dinucleotide
HN7TS9H02D37OR	CTTTCCCACAGCTGCAACC	60.083	57.895	71	GTTAATTGGCCCGTGAGTCC	59.657	55	431	268	(AT)^11	290	Dinucleotide
HN7TS9H02D382X	CCAACCAGGCATAGTGCAG	59.262	57.895	180	GCCCTGCCAGTTTGAGTTC	59.786	57.895	355	214	(AC)^16	246	Dinucleotide
HN7TS9H02D3HWV	GGCCTTGCTTTCAGAGGTTG	60.152	55	137	CGGTGATCTTCTAGCAGTTGG	59.204	52.381	455	392	(GT)^11	414	Dinucleotide
HN7TS9H02D3JGT	GCAGTTCAAACCCAGAGGC	59.786	57.895	145	ACCCAAATAGTCCGGGCAG	60.157	57.895	491	198	(AC)^10	218	Dinucleotide
HN7TS9H02D3T1K	GGGCAGCTTCATATTGTCCC	59.435	55	27	GTCCAAGCTCCTTGCAGAAC	59.87	55	325	193	(GT)^9	211	Dinucleotide
HN7TS9H02D3VLX	GCTGCACAGAAGCTCCTAC	58.977	57.895	24	AGTTAGGGCGACAACACTTATTC	59.513	43.478	381	331	(GT)^9	349	Dinucleotide
HN7TS9H02D44TX	TTTGGTCCACTTGGTCCTG	57.942	52.632	51	GCCAGTTACAGCCACTTCTG	59.587	55	481	278	(GT)^13	304	Dinucleotide
HN7TS9H02D467B	GGCAAGGAAGATATGTCGCTG	59.878	52.381	67	AATTGCCAGAGCTCGACGG	61.193	57.895	359	212	(AG)^8	228	Dinucleotide
HN7TS9H02D48T9	AAGGCGATGTCCAGTGAGC	60.829	57.895	89	GCCAGCAGGCTTTATGGTG	59.934	57.895	520	429	(GT)^9	447	Dinucleotide
HN7TS9H02D4DUV	TGTCAGAGGGTTGTTGAAGC	58.789	50	156	TGTCGGCAGTGTGACAATTAG	59.337	47.619	487	360	(AT)^12	384	Dinucleotide
HN7TS9H02D4JRA	TCTGGCCTTTCCCTGTAGC	59.775	57.895	30	CAATGGGCTTTCCTGGCTG	59.857	57.895	333	95	(AT)^8	111	Dinucleotide
HN7TS9H02D4OVB	TGGCATCTGCATGTTCTGG	58.877	52.632	230	AACCGCAGGCTAAGGAAAC	58.807	52.632	442	261	(AC)^9	279	Dinucleotide
HN7TS9H02D4U1V	TGCAGACAGAATTCAATGAGGG	59.418	45.455	41	AGGTGTTCGCTGTACCTCC	59.781	57.895	389	256	(AT)^8	272	Dinucleotide
HN7TS9H02D4WZJ	TGAAGTGACAACAGCTGGG	58.35	52.632	18	TTGTCTCAAATTACACTGCCG	57.58	42.857	194	140	(GT)^12	164	Dinucleotide
HN7TS9H02D4ZZZ	GGCATCTTCTGTGGCTTGC	60.232	57.895	169	TCTGAACGAGAGCTGACCC	59.483	57.895	537	341	(AC)^13	367	Dinucleotide
HN7TS9H02D57EJ	GTTGATCATGGATGGAGCCC	59.145	55	15	GAACCTGTTTGGAGCACCC	59.409	57.895	369	248	(AC)^8	264	Dinucleotide
HN7TS9H02D586E	TGGAACCAGTAACAGACATATTGC	59.831	41.667	129	GCATCCGCCCTCATTAAGC	59.788	57.895	502	170	(AC)^14	198	Dinucleotide
HN7TS9H02D5BCN	GCAGACATAAGCAACAGGTTCTAC	60.667	45.833	4	ATGACCTTCAGACGCCCTG	60.157	57.895	231	99	(AC)^11	121	Dinucleotide
HN7TS9H02D5HL7	AGAAAGGGCTTGACCAGGG	60.003	57.895	98	GAGTTTGCCCGACGTTCAC	60.158	57.895	394	212	(AT)^12	236	Dinucleotide
HN7TS9H02D5IA3	TCTGATTTGAATATAGGTTCACTGC	57.98	36	5	GCCACCCAGAATGTGCTTC	59.86	57.895	371	52	(AT)^8	68	Dinucleotide
HN7TS9H02D5J4J	TGTTGCACTACCATGACTGTTG	59.882	45.455	105	TCACTCCCATGAGGTCAGC	59.472	57.895	385	151	(AT)^8	167	Dinucleotide
HN7TS9H02D5PSS	GCATCCTGATTTGGCAGGC	60.307	57.895	81	CACACATCTGGCAAGCTCC	59.565	57.895	432	359	(GT)^8	375	Dinucleotide
HN7TS9H02D5S53	GCTCTTAAGGGATTGACTCCAG	58.962	50	73	CATGAAGGTGCCCATGCAG	59.934	57.895	521	280	(GT)^12	304	Dinucleotide
HN7TS9H02D5TN0	TCCAGAGTGCTACCAAGCC	59.778	57.895	205	GATCACTGCAGCGGTTCAC	59.94	57.895	649	411	(AC)^9	429	Dinucleotide
HN7TS9H02D5VQC	GCTTGAGGCAAGACATGTAGG	59.741	52.381	18	GGCAGATGCTTGAGGTGTC	59.267	57.895	292	147	(GT)^12	171	Dinucleotide
HN7TS9H02D63CX	ACCTCTTCACAGCCTTCCC	59.697	57.895	61	CGTCGAAGGTCCTGACTCG	60.593	63.158	455	100	(GT)^11	122	Dinucleotide
HN7TS9H02D6D09	ATCATGAGAGCCGGACACG	60.306	57.895	243	TGGTGGCGTCCTTTGGAG	60.322	61.111	522	422	(CT)^9	440	Dinucleotide
HN7TS9H02D6G0W	TTTCCCACGCTACCGAGAC	60.158	57.895	357	AGGGAGGACGTTTCTGCAC	60.383	57.895	583	445	(AC)^10	465	Dinucleotide
HN7TS9H02D6IND	AATGAAGGATCGCCCTTGC	58.953	52.632	125	CGCTGACAAACAGGCGTAG	59.942	57.895	543	199	(AC)^8	215	Dinucleotide
HN7TS9H02D6KE8	ACTTCAGTGCAAGCTCCATC	58.936	50	263	ACTCTGTTCTCCGAGGGTC	58.793	57.895	597	425	(AC)^12	449	Dinucleotide
HN7TS9H02D6KWC	CACCACCATCTGAACAGGC	59.187	57.895	448	CAGGTGCCTAAGTTATCTGGAC	58.965	50	674	548	(AC)^9	566	Dinucleotide
HN7TS9H02D6PKY	GTCTTGGCAGCACTTAGCC	59.566	57.895	125	TGTACTCTTCCCTAACGACTG	57.27	47.619	362	266	(AC)^15	296	Dinucleotide
HN7TS9H02D6QLC	GGTGCTGCTTCTGGACATC	59.267	57.895	223	CCCGACTACCCTCAAACC	57.391	61.111	470	415	(GT)^8	431	Dinucleotide
HN7TS9H02D6WDY	TTGCCACCGTGTTGGATTG	59.71	52.632	150	AATTTGTCCCTAACGAGCTTC	57.006	42.857	331	242	(AC)^10	262	Dinucleotide
HN7TS9H02D6ZMG	ACCTCTTCACAGCCTTCCC	59.697	57.895	61	CACAGATCTTGCAGACGCC	59.647	57.895	499	100	(GT)^11	122	Dinucleotide
HN7TS9H02D73SS	ACCTGAGACTTCAGCTGGG	59.394	57.895	181	GGACGTGTAACTTCTGTGCC	59.593	55	476	310	(AG)^8	326	Dinucleotide
HN7TS9H02D7F66	TGCAATACATTTAAGGACGAAATCC	58.977	36	126	TCGAGGCTTTGACGAAACG	59.214	52.632	452	191	(AT)^9	209	Dinucleotide
HN7TS9H02D7FKW	ACCTTCAAAGGCTAGGAACATAAC	59.524	41.667	1	TGGAAGTCAGGGCCATCAG	59.774	57.895	367	48	(GT)^13	74	Dinucleotide
HN7TS9H02D7HDO	GCCCTTTCTGCACTGGAAC	59.786	57.895	151	AAGACTGGTCACCCTGGAG	59.004	57.895	432	284	(AC)^8	300	Dinucleotide
HN7TS9H02D7MZC	GCACACTACGGCTGCATTAAC	60.941	52.381	32	GGCCCTTGTGTTCTCATCC	58.878	57.895	203	63	(AC)^9	81	Dinucleotide
HN7TS9H02D7TRT	AGGAGCCGTATTTGGCTTTC	59.005	50	235	CACTACTGAAGGCAAGCGG	59.276	57.895	396	326	(AC)^12	350	Dinucleotide
HN7TS9H02D7VYQ	AGCACTCAAGTCCTGTTGTC	58.507	50	106	GTTTCTCACTTCCCGCCATAG	59.471	52.381	352	204	(AC)^9	222	Dinucleotide
HN7TS9H02D7YXJ	AAACATTGTGGCGGAATAGG	57.139	45	186	ACCCTCGAATGCCTGGAAC	60.46	57.895	634	469	(AC)^10	489	Dinucleotide
HN7TS9H02D7Z4Q	ACAGTGAAGGCAGAAGGGC	60.688	57.895	35	TGCACAGTAGCAACCTTCC	58.428	52.632	416	143	(CT)^9	161	Dinucleotide
HN7TS9H02D8891	TGTTGGCATGGATGTCTAATG	57.051	42.857	105	TGCTGCCAGTATTAATTGTTCAAG	58.813	37.5	350	137	(AC)^13	163	Dinucleotide
HN7TS9H02D8C52	ACCATGTGCTTAGTCATTGGTC	59.42	45.455	12	AACATTTGGAGTGCCATGC	57.526	47.368	295	124	(GT)^14	152	Dinucleotide
HN7TS9H02D8CWV	CCAACACCCTCTGCGAAAC	59.79	57.895	135	CGATCACTCCTACGCTGGG	60.379	63.158	382	309	(GT)^19	347	Dinucleotide
HN7TS9H02D8D1F	GCTGCCTATGCTTTCCAGC	60.01	57.895	486	ATCCTAACTCCACGCTGCC	60.233	57.895	749	518	(AC)^8	534	Dinucleotide
HN7TS9H02D8ET7	GGTGCTGCTTCTGGACATC	59.267	57.895	223	CCCGACTACCCTCAAACC	57.391	61.111	470	415	(GT)^8	431	Dinucleotide
HN7TS9H02D8IL5	GCCAATCACAGCCAACCTC	59.86	57.895	13	AAGCTTGAGCAGTCCAGGG	60.385	57.895	430	75	(AC)^12	99	Dinucleotide
HN7TS9H02D8PHS	TGGCTCAGTGCAAACATGG	59.408	52.632	468	CAACAGCTTAGTGAGATCAAAGG	58.214	43.478	675	588	(GT)^8	604	Dinucleotide
HN7TS9H02D8VTH	AAAGTGCCACGCACGTATC	59.573	52.632	184	CAAGGCATTACCTGGGAGC	58.953	57.895	492	357	(GT)^11	379	Dinucleotide
HN7TS9H02D92RL	CCACTCTGGGACGTTCAGG	60.456	63.158	316	GCCGAAATGAGAGTGTTACGG	60.081	52.381	505	370	(AC)^11	392	Dinucleotide
HN7TS9H02D93JT	CTGAAGGTCCCAGAGCAGG	60.157	63.158	305	AGTAGTTCTCTGATATGGAGTGG	57.395	43.478	628	547	(AC)^17	581	Dinucleotide
HN7TS9H02D9ECS	TGTCTGTGTCACGCTCAGG	60.38	57.895	106	TGTGTGTTCTCCACCTCGG	60.007	57.895	329	183	(AC)^9	201	Dinucleotide
HN7TS9H02D9OGH	AGCTCTATCTGTGAAGCCAG	57.483	50	185	ACTACTATCCTGGGCCGTG	58.939	57.895	512	418	(AC)^18	454	Dinucleotide
HN7TS9H02D9P85	GGACGGCATTGAACCAAAGG	60.505	55	29	ACTGGTGGGCTGTAACCTG	60.004	57.895	242	157	(AC)^13	183	Dinucleotide
HN7TS9H02D9UBK	GCTCCCTTCTTCTGAGCCC	60.534	63.158	37	ACGGACAGAAAGGAATTGGC	59.221	50	457	260	(AC)^11	282	Dinucleotide
HN7TS9H02D9WA5	ACGTCTTTCACCATAAAGCCTC	59.425	45.455	52	ACGGACCTGTTCAGAAGACC	60.08	55	377	321	(CT)^11	343	Dinucleotide
HN7TS9H02DA5G2	ATAAACAGACACTTCCATCTGC	57.19	40.909	8	AGTGCTGAATCACTGCTTGG	59.223	50	357	138	(AT)^10	158	Dinucleotide
HN7TS9H02DA6DF	ACGCCATACAAACAGGTGG	58.808	52.632	10	GCTGTGCCCTGACTTCTTG	59.491	57.895	445	176	(GT)^8	192	Dinucleotide
HN7TS9H02DA9M6	AGTTGCAGAGATGTGATTGGC	59.669	47.619	56	ATTCTGGGCATGGGACTGC	60.844	57.895	262	189	(AT)^8	205	Dinucleotide
HN7TS9H02DAC6N	CAATTGACCGTGTTGACTGG	58.051	50	78	AGCAGGATCTTGTGGGATGG	60.224	55	412	209	(AC)^15	239	Dinucleotide
HN7TS9H02DADCV	GTAGTGAACATGCCCAGCG	59.645	57.895	0	CTAGAGGCCCACAGCTTCC	60.233	63.158	243	169	(GT)^13	195	Dinucleotide
HN7TS9H02DADIQ	CATGCACCGGTTTCCTCAC	59.863	57.895	97	GCTGTAGCCTCTGTGACTTG	59.025	55	360	271	(AG)^12	295	Dinucleotide
HN7TS9H02DAFSM	TCAATTCCCAGGGTGGCTG	60.387	57.895	13	ACTCACAAGCTGTCCACTAC	57.932	50	355	252	(GT)^8	268	Dinucleotide
HN7TS9H02DAMYU	AGTTACTAGGCAACACTGATGAAC	59.532	41.667	103	GACTATGACAGGCCCACGG	60.605	63.158	299	142	(AC)^15	172	Dinucleotide
HN7TS9H02DAS7Z	GCTTACCAGTATGCAAGGC	57.114	52.632	30	TGCAGGGTGGTAGCACAG	60.005	61.111	354	69	(AG)^9	87	Dinucleotide
HN7TS9H02DAXDG	CAAATGTGGAGGGCATGGAC	59.937	55	90	GCATCTCGTCCCAAAGAAGC	60.012	55	453	282	(AC)^12	306	Dinucleotide
HN7TS9H02DB7XI	AACACCTCTCCTGATGGCG	60.157	57.895	507	TCAGCAGCTAGACTCGTGG	59.562	57.895	740	577	(GT)^9	595	Dinucleotide
HN7TS9H02DBAWV	AGGCTTATGGGACCACTGC	60.157	57.895	212	ACCTAGAGGTTGTCTGCACG	60.152	55	543	442	(GT)^13	468	Dinucleotide
HN7TS9H02DBELE	TGTGCCAACATTGCTTCCG	60.084	52.632	144	TGTGGAATGCTCAGGGTGC	61.063	57.895	518	456	(AC)^9	474	Dinucleotide
HN7TS9H02DBFN8	ACACAAATCTAGCACAGGACG	59.064	47.619	4	GAGGTCCCAGATAGGAAGTGG	59.73	57.143	391	122	(CT)^8	138	Dinucleotide
HN7TS9H02DBFZ9	AGGCTGAGTGAGGATTTCCC	59.859	55	71	TGGAAGCAGTCTCCAAGGC	60.385	57.895	447	136	(GT)^9	154	Dinucleotide
HN7TS9H02DBIUT	ATTGAACGCTCCATTGCCC	59.558	52.632	135	GCACAGCAATGAGTGAGGC	60.231	57.895	497	286	(CT)^8	302	Dinucleotide
HN7TS9H02DBQ78	TGGTAACGACTGGCAAGGG	60.384	57.895	80	CATCCCGCTGTTTCGGTTC	59.939	57.895	277	132	(AC)^17	166	Dinucleotide
HN7TS9H02DBWML	ACAGGTGCACGTTGCTTAC	59.421	52.632	121	TCAATTTGCCTGGGACTGG	58.4	52.632	270	165	(AC)^13	191	Dinucleotide
HN7TS9H02DBZPE	GTCCATGATTCTGGTTGCCC	59.651	55	162	AGGCTGGACTTGTTGGAGG	60.004	57.895	508	242	(AC)^15	272	Dinucleotide
HN7TS9H02DC0TT	CAGAGGTAACATTCTGCAGCC	59.741	52.381	74	TCCTTCCTGAAGTACCCGC	59.475	57.895	495	137	(AC)^13	163	Dinucleotide
HN7TS9H02DC3H8	GCAAGTCTGTCCACCTGGG	61.058	63.158	153	GCACACCTATGTGCCTTCC	59.264	57.895	519	354	(AC)^8	370	Dinucleotide
HN7TS9H02DC3Z9	GTTCAAGGGCTTCAGCTATGG	59.738	52.381	143	ACTGATTGTGCTGTAGTTCTCC	58.832	45.455	355	178	(AC)^9	196	Dinucleotide
HN7TS9H02DC5MS	TGGCATCTGCATGTTCTGG	58.877	52.632	230	AAACCGCAGGCTAAGGAAC	58.807	52.632	441	261	(AC)^9	279	Dinucleotide
HN7TS9H02DCFHG	GCTTGAGAATGACTGCACCC	59.94	55	51	CTTCAGCGAAGGAGAGCCC	60.9	63.158	359	136	(CT)^8	152	Dinucleotide
HN7TS9H02DCN5R	TGGGAGGCCCTGATTTGTC	60.08	57.895	508	AGAGTGCATCCTCAACTCG	57.614	52.632	703	592	(GT)^12	616	Dinucleotide
HN7TS9H02DCNTV	TTCCTCACTCGTTCAGCCC	60.082	57.895	36	CCACTTCCTCTTTGCCTGAC	59.225	55	343	216	(AC)^16	248	Dinucleotide
HN7TS9H02DCOJJ	TTGCCGAAGTGAGTCAAGC	59.123	52.632	429	TCATAGTTATGCTAGTGCCTAAACC	59.255	40	585	512	(CT)^8	528	Dinucleotide
HN7TS9H02DCR2G	AAGAGTGGTTCTGTCCACC	57.336	52.632	13	GTCACACACAGCCCTATTGC	59.941	55	201	116	(AC)^12	140	Dinucleotide
HN7TS9H02DD3E1	TGCCAGAGGTGGCTTACAG	60.081	57.895	191	ACCGTTCTCTGGGAAGATGAC	60.215	52.381	403	272	(AG)^10	292	Dinucleotide
HN7TS9H02DD5SB	GCAATGCAAGGTCTTATGGG	57.872	50	30	TCAGTGAGATCCAGGTACAAATG	58.682	43.478	395	218	(AT)^13	244	Dinucleotide
HN7TS9H02DD9NK	ACCTCTTCACAGCCTTCCC	59.697	57.895	61	TGTCGAAGGTCCTGACTCG	59.489	57.895	457	100	(GT)^11	122	Dinucleotide
HN7TS9H02DDAHC	TGAGGGCTTCGTCTTCCAG	59.78	57.895	336	GACGAAAGGCGCGCATAG	60.09	61.111	620	556	(AC)^14	584	Dinucleotide
HN7TS9H02DDD2Z	GGTGAAGCTGAGAAGCCAAG	59.585	55	85	GCATTCATGTTGGGCCTCC	59.933	57.895	429	198	(AC)^10	218	Dinucleotide
HN7TS9H02DDHLE	GAACAGACTGCCACTTAGCC	59.303	55	112	CGCACTCCCTTGATTGACC	59.27	57.895	509	273	(AC)^11	295	Dinucleotide
HN7TS9H02DDSX6	TGCTGAATTTGGGAACTGAAG	57.468	42.857	17	TACCGAGAACCCTGGTCCC	61.078	63.158	453	76	(AC)^20	116	Dinucleotide
HN7TS9H02DE8J0	GCAACAAAGAATGCAGTCCAG	59.075	47.619	0	CGTGTACCCACCCTCGTAG	59.936	63.158	443	365	(AC)^18	401	Dinucleotide
HN7TS9H02DEAVU	AGGGCTCCACTTACGTTCC	59.779	57.895	298	ACAGACTTTGCAGAATCGCC	59.587	50	716	659	(AC)^11	681	Dinucleotide
HN7TS9H02DEDCX	TGAACTGGCAGGACATTGC	59.106	52.632	92	CTCGATTGTGTCAGGTGCAG	59.664	55	320	153	(GT)^14	181	Dinucleotide
HN7TS9H02DEF5S	AGCCATGATTAGTTTCCAAGCTG	60.074	43.478	22	AGGCATCTGCCAATAAGGC	58.637	52.632	348	250	(AC)^8	266	Dinucleotide
HN7TS9H02DEFDA	GTGAATCTCTGCCCTTGCG	59.643	57.895	155	ATGGCAACCATGTGTCAAC	57.149	47.368	586	381	(GT)^13	407	Dinucleotide
HN7TS9H02DEHQZ	TACTTGGGAGACCTTGGGC	59.387	57.895	205	TCAGCAAGCAACGTATCTATTC	57.365	40.909	592	536	(GT)^11	558	Dinucleotide
HN7TS9H02DELGD	GCAGTGATCCAACTCCAGC	59.267	57.895	399	TGAAACGGGTCGTACGGTG	60.745	57.895	615	510	(AG)^8	526	Dinucleotide
HN7TS9H02DEZ4B	GGCCAATTCCCAGTTAGCATAG	59.879	50	67	GTTTGCAGGCGAACCTTCC	60.452	57.895	325	101	(AC)^12	125	Dinucleotide
HN7TS9H02DF3QY	TGAGGAAATGCCACCATGAAAC	60.207	45.455	206	GGACAACGCAGTACGAACC	59.578	57.895	538	455	(GT)^18	491	Dinucleotide
HN7TS9H02DF4J9	GACAGGTGTGGTCAGTCCC	60.383	63.158	180	GTCTGCGCATAACACGTCC	60.015	57.895	579	264	(CT)^8	280	Dinucleotide
HN7TS9H02DFAX9	TGCAGTTTCAAGCAGTGGC	60.009	52.632	143	TCGGTCTATCTTTGCAGTCC	57.791	50	471	269	(GT)^10	289	Dinucleotide
HN7TS9H02DFBHP	ACCAGTCGCCCACTATTGC	60.832	57.895	113	CTTCGCCTCACACTCCTTG	58.904	57.895	516	212	(AT)^10	232	Dinucleotide
HN7TS9H02DFCDU	ACAGAGTTTGGGAATTAGCTAGAAG	59.369	40	14	TGTAGCCTGGAAAGGTTGC	58.416	52.632	286	97	(GT)^11	119	Dinucleotide
HN7TS9H02DFN0L	AGCAGTCTCAGTCCTTGTGG	60.079	55	9	CGATCATGCAAACCGGTCG	60.374	57.895	360	63	(CT)^9	81	Dinucleotide
HN7TS9H02DFNS3	GACCTTTGTGATGACACATTAACC	59.062	41.667	74	AGAAACTATCAGTTGGTTCAGC	57.125	40.909	325	256	(GT)^8	272	Dinucleotide
HN7TS9H02DFODX	CATCTGGGCAAGGTCCATC	58.647	57.895	162	GCCACCGCAATATCAGTCG	59.795	57.895	468	342	(AC)^11	364	Dinucleotide
HN7TS9H02DFP0I	ACTGCAAGGCAAGAAACCC	59.326	52.632	73	AGATAGTCAACACGGGAAGG	57.408	50	253	125	(AC)^16	157	Dinucleotide
HN7TS9H02DFTXT	GAATCACTGGGATGCAGAAC	57.239	50	18	TCCATGGGACATGTAGGACTTC	60.008	50	217	121	(GT)^10	141	Dinucleotide
HN7TS9H02DFXNA	TGAGGGCTACACGCTATAAG	57.285	50	289	ACACCTTTCATCCCAGTGTC	58.195	50	465	405	(AT)^11	427	Dinucleotide
HN7TS9H02DFXZC	GGGCAAGTACATCCTACAGC	58.797	55	170	TCAAAGAAATCTGCAATGCCC	58.161	42.857	515	375	(AC)^8	391	Dinucleotide
HN7TS9H02DG717	GAAAGTGGCCTGAAGCTGG	59.486	57.895	238	ACCGTTGTTGTGCTGAATAC	57.399	45	594	518	(GT)^13	544	Dinucleotide
HN7TS9H02DG87H	ATCCAGGAACCGCCCAAC	60.404	61.111	31	AGTGGTCGCCAGGATACAG	59.553	57.895	346	64	(AC)^17	98	Dinucleotide
HN7TS9H02DG9A2	AATCAACAGTGCGCCATGC	60.526	52.632	69	TCTGTAGAGTGAATGGACTACCTC	59.585	45.833	454	269	(AG)^13	295	Dinucleotide
HN7TS9H02DGCMK	CCATGGGTTTGTACAGTGAAGG	59.946	50	356	TCATGGCTGTTTCAATTCCTTTG	58.882	39.13	583	443	(GT)^8	459	Dinucleotide
HN7TS9H02DGDWS	GAGTCGTTCAACTCTTCATTGC	58.682	45.455	92	GCTGTGTGAATGATTGGTCCC	60.282	52.381	261	199	(AG)^15	229	Dinucleotide
HN7TS9H02DGJHU	GGCTTTAACATAGTTTCATTCTTGGC	60.237	38.462	90	CCTTCTGTGAACTGCAGGC	59.491	57.895	285	175	(CT)^10	195	Dinucleotide
HN7TS9H02DGJIC	TCAACGGATTTCTGCTTAGGG	58.775	47.619	102	AGAGTGCAGGAAGACCCTTG	60.079	55	546	282	(AC)^8	298	Dinucleotide
HN7TS9H02DGKKE	CAGGAACATTTGGAGAGGTGC	59.943	52.381	64	GATGTGCGCTGGAGAATCG	59.796	57.895	495	145	(AC)^8	161	Dinucleotide
HN7TS9H02DGM8V	CTTTGTGGTGGCATCTACCC	59.293	55	3	GGCTTTAGAGTCCTTGTGCC	59.298	55	350	266	(AC)^16	298	Dinucleotide
HN7TS9H02DGMLM	AAGAGCGCTTTCTGGTTGG	59.113	52.632	353	TGTCTCACTCGTACACTTAGC	57.921	47.619	611	404	(GT)^10	424	Dinucleotide
HN7TS9H02DGQO1	CAGATGATCAACCATACGAGTTCC	60.015	45.833	66	CTCGGGACCGATTCCTATCC	59.866	60	427	303	(AC)^8	319	Dinucleotide
HN7TS9H02DH049	CATCAACTAGGAGTCAGCCAC	58.856	52.381	144	TTCAGTACTTGCCAGATCCC	57.683	50	593	373	(AC)^11	395	Dinucleotide
HN7TS9H02DH3U3	CCTCCATATTCAGTTGCCCTC	58.908	52.381	86	ACTGCACAGGATACAGGTG	57.506	52.632	293	184	(AC)^13	210	Dinucleotide
HN7TS9H02DH6UG	ATGAACTAACAGAATATGTCCACC	57.274	37.5	34	ACCGTGTCAGCATACCTCC	59.856	57.895	184	96	(GT)^8	112	Dinucleotide
HN7TS9H02DH8MI	GCGATCAGAAACCTCTGGC	59.348	57.895	198	AGATAGGAAGTGCATTTACGTG	57.016	40.909	593	497	(GT)^10	517	Dinucleotide
HN7TS9H02DHGM4	GAACAGGGTGGCAGTGAAG	59.113	57.895	114	GTACTTGCACGTGGTAGCG	59.654	57.895	398	194	(AC)^18	230	Dinucleotide
HN7TS9H02DHHB4	ACTGTGAGACCTCATGCTG	57.517	52.632	13	ATGCTCTGGGACTTTGCAC	58.801	52.632	213	95	(GT)^8	111	Dinucleotide
HN7TS9H02DHI57	ACCTCTTCACAGCCTTCCC	59.697	57.895	61	TGTCGAAGGTCCTGACTCG	59.489	57.895	457	100	(GT)^11	122	Dinucleotide
HN7TS9H02DHIZK	ACCCAGCTCTTTCCAGGATG	60.151	55	115	GCCTGTCAAGACTTCCTCTG	58.658	55	494	265	(GT)^8	281	Dinucleotide
HN7TS9H02DHKU9	AGGCTCTCTGGAAAGTCCC	59.079	57.895	4	GAGTGTTTCCTAGCTGAACGC	60.014	52.381	166	110	(AC)^13	136	Dinucleotide
HN7TS9H02DI1C8	TTGGCTAACCCATTGCCAC	59.095	52.632	88	GCTTCCCGTGTTCCAAACC	60.084	57.895	293	160	(GT)^11	182	Dinucleotide
HN7TS9H02DI8GE	AATGTTGACGCAAGACCGC	60.158	52.632	227	ACCTTGTTGAATGTAGTGCCG	59.604	47.619	534	429	(AC)^10	449	Dinucleotide
HN7TS9H02DIBSZ	CTGGGCTGCAGTTTCCATC	59.561	57.895	55	TCTGAATTAAACGTAGGTGTAGCG	59.66	41.667	238	180	(AT)^12	204	Dinucleotide
HN7TS9H02DICWB	TGTGTGTTCTCCACCTCGG	60.007	57.895	98	TGTCTGTGTCACGCTCAGG	60.38	57.895	315	229	(GT)^12	253	Dinucleotide
HN7TS9H02DIHN6	AGGTGGAGCTGTGGAACTC	59.701	57.895	161	GTCCTCTTGAGTGAATGCCG	59.379	55	555	502	(AC)^12	526	Dinucleotide
HN7TS9H02DII76	TCTGCGTCCCTGAATGCTC	60.531	57.895	30	TGGTCCAGATACGTGAAGACC	59.941	52.381	418	362	(AC)^10	382	Dinucleotide
HN7TS9H02DIJSD	CAATTGACCGTGTTGACTGG	58.051	50	78	AGCAGGATCTTGTGGGATGG	60.224	55	412	209	(AC)^15	239	Dinucleotide
HN7TS9H02DINGP	GGCTCCAAACTTAGGTAAGGAAATC	60.419	44	168	AGTGAGGGCTGTGAGCATC	60.157	57.895	448	234	(AG)^8	250	Dinucleotide
HN7TS9H02DJEL4	GCAAGAGGGATCCAAACAGC	59.939	55	17	GCCAGTCCCTGTAGGAAGG	59.853	63.158	463	63	(AG)^8	79	Dinucleotide
HN7TS9H02DJGLZ	CTCATTCCCAGCACGTATGC	59.802	55	94	TCTCATGCAGAAGTTAAGGAGC	58.897	45.455	360	177	(AC)^12	201	Dinucleotide
HN7TS9H02DJO48	GGGTGGCTTTAGAAACTGAGC	59.943	52.381	216	ATCACTAGGAAGACACCAAGG	57.5	47.619	617	547	(AC)^9	565	Dinucleotide
HN7TS9H02DJOFQ	AGAATTCAAGGGCATAGCCAG	58.829	47.619	380	TGGGTCCAACGACTTAACG	58.15	52.632	713	532	(AC)^8	548	Dinucleotide
HN7TS9H02DJOKH	ACCATTAAGTGCCCACAGC	58.795	52.632	82	TGTGGCTGAAAGATGGTTGAC	59.531	47.619	515	393	(CT)^10	413	Dinucleotide
HN7TS9H02DJWUM	ACCTGCCCTGAGACCTTTG	60.004	57.895	66	AAAGACAGAGCCTCAACCC	57.718	52.632	478	397	(AT)^8	413	Dinucleotide
HN7TS9H02DKCQE	CCCTCCAATGTGGTTTAAATGG	58.297	45.455	24	TGCTGTGTCTCCACAGAAG	57.753	52.632	396	127	(GT)^8	143	Dinucleotide
HN7TS9H02DKFBY	GATCCCACAGAGGGTCCTG	59.547	63.158	33	CCGTGTTCACTGCAACCTAC	59.873	55	222	160	(AC)^9	178	Dinucleotide
HN7TS9H02DKKZO	TGCCAAAGAGGAAACAAGGC	59.72	50	228	CACATCACTCCTGAAGGGC	58.583	57.895	568	423	(AG)^8	439	Dinucleotide
HN7TS9H02DKMTE	AGTGCATGGAATCTTTGCTGG	59.941	47.619	184	TCTCAAGAAACCTTTACAGAGATCC	59.077	40	383	287	(GT)^11	309	Dinucleotide
HN7TS9H02DKNXD	AAGGGACCTATGTCAGCAC	57.179	52.632	324	TGAAGTCAGGAGAGACTTGGATG	60.263	47.826	625	509	(AC)^16	541	Dinucleotide
HN7TS9H02DL2Q1	GCCAAGAATGAGTTGCTATGC	58.67	47.619	141	GGGTCTGTTCATAGATTACCTGC	59.385	47.826	412	332	(AG)^11	354	Dinucleotide
HN7TS9H02DL3KN	AAACCTCCAGCCCTTACCC	59.692	57.895	300	ACGTTGGCAGTTTGAAGGC	60.01	52.632	592	393	(CT)^8	409	Dinucleotide
HN7TS9H02DL40Y	GGCGGCAAATCCCACTAAC	59.936	57.895	120	CATGTGTGTCCTCACAAGC	57.281	52.632	467	349	(AC)^15	379	Dinucleotide
HN7TS9H02DLNR4	TTTGCAACATCCTCGGCAC	59.787	52.632	56	GAAATCAGAGGCGGCGAAC	60.013	57.895	467	335	(AG)^10	355	Dinucleotide
HN7TS9H02DLVZ4	CTGCCTCTAAGTGTTGCCTTG	59.944	52.381	149	TGAAATGAATCCGGCCAGC	59.258	52.632	407	218	(CT)^12	242	Dinucleotide
HN7TS9H02DLXJE	ACAACTAGGATGTCTGGCG	57.604	52.632	80	CAGTTTGAGCGATCTGGGC	59.643	57.895	480	199	(GT)^9	217	Dinucleotide
HN7TS9H02DLZ56	AGCTTGATCTCATAGCATGTTG	57.33	40.909	100	TTCCACATCTGGCAGGGAC	60.081	57.895	363	193	(AC)^9	211	Dinucleotide
HN7TS9H02DM0V1	CTCCTAATCCAAGGAAGTCACG	58.972	50	154	GGAATGCCAAGGTCATCGC	60.01	57.895	455	338	(AC)^8	354	Dinucleotide
HN7TS9H02DM3J3	ATGATGGCACAAGTAACCATAC	57.245	40.909	197	CCAGTTCAGCAGGGCATTC	59.561	57.895	471	352	(AC)^9	370	Dinucleotide
HN7TS9H02DM4UE	CTGCAACGGGAGAAATTTGG	58.39	50	4	TCTGGTTGCATACAGGTTCATC	59.157	45.455	182	41	(AG)^17	75	Dinucleotide
HN7TS9H02DMIGB	AGTATGGTCCTAAGGTGCTTTAAC	59.036	41.667	25	AGGCAGTGACCAGAATGGAG	60.151	55	404	73	(AT)^8	89	Dinucleotide
HN7TS9H02DMJKM	CCTCTCTGCCATGGAATTGTC	59.464	52.381	138	TTGTGGGAATCTCTATCGGG	57.169	50	492	282	(CT)^8	298	Dinucleotide
HN7TS9H02DMK47	CCAGGAGTTGATTCACTGGC	59.296	55	37	TGCAAACGATGAACTGGGC	59.787	52.632	370	104	(AC)^9	122	Dinucleotide
HN7TS9H02DMKRE	TGGCAGATAGACTGCCCTTC	59.934	55	180	ACTGTGTAGATAGGCCACTAGG	59.209	50	543	356	(GT)^8	372	Dinucleotide
HN7TS9H02DMLJF	CCAGTGTAACTTGGTGGAGC	59.227	55	72	AAGGCCAAGTGCAGCAAAC	60.307	52.632	236	153	(AC)^9	171	Dinucleotide
HN7TS9H02DMPFS	CACCCTGCGTCTGACCTTC	61.118	63.158	66	ACCGACCAATACGGAGCAG	60.232	57.895	233	155	(GT)^9	173	Dinucleotide
HN7TS9H02DMS22	GAGGGCAGCAAGGTTGAAG	59.486	57.895	228	GCACAGGCTGAACTCGTTG	60.158	57.895	528	281	(AC)^10	301	Dinucleotide
HN7TS9H02DMS81	TGAAGACATGAAGAGCACTTAGC	59.514	43.478	36	GCCATACAATGATGTGAAACAGG	59.083	43.478	195	82	(CT)^11	104	Dinucleotide
HN7TS9H02DMVKF	TGTTTCTAGGTGAGTTTGCACAG	59.888	43.478	50	CCTATGAGCTGCAGTGGGC	61.277	63.158	479	110	(AC)^12	134	Dinucleotide
HN7TS9H02DMXER	CAACTCACCTGCTCCATGAC	59.302	55	57	GAGACACTGGGTGACAGTAATTC	59.515	47.826	440	339	(GT)^9	357	Dinucleotide
HN7TS9H02DN3BX	TGGCCCTCGTGTCTACAAC	60.083	57.895	412	AAGGAATAGCTGCCCTCGG	59.929	57.895	637	555	(GT)^13	581	Dinucleotide
HN7TS9H02DN6UT	TACAGGGCTCTGGGATTGC	59.851	57.895	188	GTCCGCTGAATGGCTTTGG	60.232	57.895	451	258	(AC)^11	280	Dinucleotide
HN7TS9H02DN7O6	TCTCAGCAGCCCTATTCTGG	59.642	55	114	GCTCTGGAAGTTGAAGCCAC	59.87	55	326	187	(GT)^9	205	Dinucleotide
HN7TS9H02DN86B	AGTGCTGTGCGAATAGTTAGG	58.859	47.619	158	TTCGTCCCGAACGGCTTAC	60.819	57.895	360	197	(GT)^13	223	Dinucleotide
HN7TS9H02DNG1Y	CTGCTGGTTAGTGTGCTACC	59.02	55	298	TGCCTTGAAATATGTGATTTGCC	59.009	39.13	487	367	(AC)^10	387	Dinucleotide
HN7TS9H02DNKKX	TCCACAATATCTCTCAAGACGG	58.108	45.455	62	AGCTGTGGGTGGAGCATC	60.084	61.111	403	94	(GT)^11	116	Dinucleotide
HN7TS9H02DNM25	GCAAGAGGGATCCAAACAGC	59.939	55	17	GGTCAGCCAGTCCCTGTAG	59.856	63.158	466	63	(AG)^8	79	Dinucleotide
HN7TS9H02DNM43	AAGCCCAGTGTGGATGCAG	61.065	57.895	36	TCCTCGTGCCATGATAGGTG	60.008	55	219	127	(GT)^17	161	Dinucleotide
HN7TS9H02DNP5T	GCCGCCTTCTCATCTAAGC	59.126	57.895	66	TCGGAGTGAGCTATGGTGC	59.933	57.895	352	156	(CT)^11	178	Dinucleotide
HN7TS9H02DNR14	GCCCTTAAAGCAAGCCCAC	60.158	57.895	171	ACGCATGTAGCAACTGTACG	59.388	50	451	309	(GT)^12	333	Dinucleotide
HN7TS9H02DNRY0	ACCTTTGGGTATAGGGCAGG	59.559	55	112	TCATTGCCTAGCAGAAGCTC	58.433	50	513	237	(AC)^8	253	Dinucleotide
HN7TS9H02DNT5A	ACCACCTCCATGATGTCTCC	59.566	55	196	AGAGTGCAGCATTTCCGTG	59.194	52.632	453	234	(AC)^8	250	Dinucleotide
HN7TS9H02DNXF0	AAAGCTTCTGAGCAGTTACATC	57.47	40.909	2	CGCACTTCCTCTGCCATAC	59.054	57.895	190	65	(AC)^11	87	Dinucleotide
HN7TS9H02DO7WJ	CCCACGGTAATAGCTGTATGC	59.337	52.381	10	AAGTGCTGTGTGAACTGCC	59.338	52.632	407	200	(AC)^14	228	Dinucleotide
HN7TS9H02DO9UE	TGTTGGCCTTGCTGAAGTG	59.333	52.632	118	TGCTGTTAAGCACAGGAACTC	59.262	47.619	540	457	(CT)^8	473	Dinucleotide
HN7TS9H02DOIF4	GACCTGCCACCTAGAGGAC	59.553	63.158	340	TGTTGAAGCCGATCTGCAC	59.197	52.632	591	468	(CT)^8	484	Dinucleotide
HN7TS9H02DOOE8	TCTGATCATTTGGGAAGAGGC	58.482	47.619	332	CAACACACACTTCTGCATTGG	59.009	47.619	669	369	(GT)^8	385	Dinucleotide
HN7TS9H02DOR38	GGAGGCAGAGAATCCTGGG	59.929	63.158	118	TGAAATAGTAGACTTGGGATGCAC	59.346	41.667	483	421	(AC)^11	443	Dinucleotide
HN7TS9H02DOU06	TTGCAAGCACACCTGAAAG	57.398	47.368	141	AGCTTGCTCTTCGGACCAC	60.754	57.895	412	313	(AT)^12	337	Dinucleotide
HN7TS9H02DOWDS	GGGTGGTGGGCAACTTTAC	59.405	57.895	331	GCACATAGTTGGCAAGAGTACC	60.078	50	611	500	(AC)^16	532	Dinucleotide
HN7TS9H02DOX1L	GGTGGCTTGGCAGGTTTC	59.693	61.111	66	TGCCTCTGTAGCTTTGTGAAC	59.262	47.619	484	414	(CT)^8	430	Dinucleotide
HN7TS9H02DOX5U	AGACCCATTGCTCCAGTGC	60.763	57.895	169	CCGTTCCACACTTGCCTTC	59.79	57.895	352	220	(GT)^11	242	Dinucleotide
HN7TS9H02DOXWF	ACATGCCAACTTTCCCTGC	59.402	52.632	164	GGAGGTGTGAAGCATCTGG	58.583	57.895	397	316	(GT)^10	336	Dinucleotide
HN7TS9H02DOYFP	TGAACTGGCAACCATCTGC	59.106	52.632	198	GTTCAGTGTACAGTCGAGACG	59.16	52.381	614	467	(AT)^11	489	Dinucleotide
HN7TS9H02DP3LI	AGGTCAGTGGTAGAACATTTGC	59.354	45.455	126	AGGGACCTCCAGGGTCATC	60.78	63.158	573	160	(AC)^9	178	Dinucleotide
HN7TS9H02DP689	AGGCAAGGGCTAACTGTGG	60.386	57.895	49	GGAGAGGAAAGGACAACTAACTTC	59.531	45.833	343	227	(GT)^11	249	Dinucleotide
HN7TS9H02DPKBS	AACCCTCTGCTTTCCAGGC	60.691	57.895	206	GCCACTGCTTGAGGAGACC	61.127	63.158	505	272	(AC)^9	290	Dinucleotide
HN7TS9H02DPM21	CTGATTGCAGGCAGAGGAC	58.967	57.895	171	ACCAGCAGCCAAGAATTCAG	59.217	50	474	390	(AC)^12	414	Dinucleotide
HN7TS9H02DPP5Z	GGTGTGATATTCAAACAAAGTGGG	59.296	41.667	97	GCCTCTGGACTCCTTTCTGG	60.511	60	326	255	(GT)^11	277	Dinucleotide
HN7TS9H02DPVM8	TCCTACCTTTAGTCTCTATAATGTTCC	58.425	37.037	0	CTGGCACTGTCCTAGGTTTC	58.652	55	256	84	(AT)^9	102	Dinucleotide
HN7TS9H02DPYWX	CATTGACGATGTCCGACCG	59.436	57.895	207	ATTCAATCAACAGAGGAACTGG	57.102	40.909	411	335	(CT)^10	355	Dinucleotide
HN7TS9H02DQ2TN	AGGTAAGTCTTTGTTCGTGCAG	59.625	45.455	16	CATTGCAGAAGCCAGGTCAG	59.94	55	283	96	(AC)^9	114	Dinucleotide
HN7TS9H02DQ32N	AGTTACTAGGCAACACTGATGAAC	59.532	41.667	103	ATGCAGATGGTAGGCCCG	59.924	61.111	252	142	(AC)^15	172	Dinucleotide
HN7TS9H02DQ75Q	TTGGAAACAATCGAATCCTCG	57.374	42.857	7	CACAGCCTGCAGAAGTTACC	59.587	55	379	97	(AC)^12	121	Dinucleotide
HN7TS9H02DQF87	CTGATGGTCCCAGGGCAAG	60.839	63.158	159	CCCGACTTTCGGAACAACC	59.496	57.895	400	223	(AT)^8	239	Dinucleotide
HN7TS9H02DQFPT	AGTGCATGGAATCTTTGCTGG	59.941	47.619	184	TCTCAAGAAACCTTTACAGAGATCC	59.077	40	381	285	(GT)^11	307	Dinucleotide
HN7TS9H02DQPPH	AGCAGTATTCAGCAAAGCCTG	59.669	47.619	34	GCACATCATACCAATTAGCAACC	59.147	43.478	382	259	(CT)^10	279	Dinucleotide
HN7TS9H02DQPQG	GGAGGCAAAGACATTGGAGC	59.939	55	42	AGACGACAGTGGCAGGATG	60.158	57.895	448	273	(AC)^9	291	Dinucleotide
HN7TS9H02DR0R5	CACTCTTCTCATTAGCCTGCC	59.196	52.381	398	GCAGCCAGCCTTAACTAAATTG	58.98	45.455	567	470	(CT)^8	486	Dinucleotide
HN7TS9H02DR2TK	TTGGATCTGGGCATGGACG	60.535	57.895	28	CCTGTGGCTGGTGGGAC	60.339	70.588	222	163	(GT)^14	191	Dinucleotide
HN7TS9H02DRMDT	CCTCTTGAGGGTGCCCTTG	60.763	63.158	57	CAGTGGTGAGTTGCAGTCC	59.12	57.895	434	235	(AC)^13	261	Dinucleotide
HN7TS9H02DRPBX	TCTCTGGATCATGTTTATGCCC	58.682	45.455	15	TCTGGATTTGGCCAGGCAG	60.767	57.895	437	179	(AT)^11	201	Dinucleotide
HN7TS9H02DRSSF	CCCTTTGCTGTATGAGAGGC	59.081	55	40	CAGCGGGAAATGTGTTGGC	60.819	57.895	457	172	(AT)^9	190	Dinucleotide
HN7TS9H02DS4FP	CAAATGTGGAGGGCATGGAC	59.937	55	90	TCTACAGAGTTCCTGCTGGG	59.206	55	538	281	(AC)^12	305	Dinucleotide
HN7TS9H02DS7OI	ACTAGCAAGGGCACTTAGG	57.179	52.632	181	AAATACAAGGACAAGATGGCAG	57.439	40.909	619	421	(AT)^8	437	Dinucleotide
HN7TS9H02DSG55	AAATGTTCAACGTGCTTTGC	57.079	40	111	GGCCCTACCTACCCTTTGG	59.85	63.158	336	155	(AC)^13	181	Dinucleotide
HN7TS9H02DSGBL	ACCCTCCCGAATTCACTGC	60.46	57.895	149	TCGCAGCTCCACTTCACAG	60.75	57.895	424	339	(AG)^9	357	Dinucleotide
HN7TS9H02DSMY1	AGCCAGGCCTTCTGTTCAC	60.688	57.895	15	AGAGTGGCTTGTTCCAGGG	60.004	57.895	447	146	(AC)^10	166	Dinucleotide
HN7TS9H02DSTMS	TGTTTCTAGGTGAGTTTGCACAG	59.888	43.478	50	CCTATGAGCTGCAGTGGGC	61.277	63.158	478	110	(AC)^12	134	Dinucleotide
HN7TS9H02DT4QZ	AGCATCACTGGGAGAAGCC	60.157	57.895	25	ACCACTTCTGTTGGTCAAGG	58.414	50	180	125	(GT)^9	143	Dinucleotide
HN7TS9H02DTFRH	GGGTTTAGGGTCAGGTGATAC	58.211	52.381	36	CTGTTACCTTTGGGCGCAG	59.863	57.895	391	77	(GT)^9	95	Dinucleotide
HN7TS9H02DTMJ2	CATTGACGATGTCCGACCG	59.436	57.895	207	CACGTTTGGTAGCGTGCC	60.165	61.111	529	335	(CT)^10	355	Dinucleotide
HN7TS9H02DTR2E	GCACACTGGCTGGAATCTG	59.565	57.895	158	AGCTAGCAGTGACCTCCATC	59.646	55	543	329	(AC)^8	345	Dinucleotide
HN7TS9H02DTSDM	CACCAGCCTGAGGGTCTTC	60.459	63.158	108	TAGACCTTTCCGGGTTCGC	60.158	57.895	325	200	(AC)^9	218	Dinucleotide
HN7TS9H02DTT9E	TGGCTCTTTCCTCTGTTAGG	57.312	50	17	AAGGAACACTGTCCGCTCC	60.383	57.895	348	128	(GT)^12	152	Dinucleotide
HN7TS9H02DU1P0	ATCCCAGGGCTATGTTGGG	59.534	57.895	158	GTCTGCGCATAACACGTCC	60.015	57.895	578	265	(CT)^8	281	Dinucleotide
HN7TS9H02DU34Y	GGCTTTAACATAGTTTCATTCTTGGC	60.237	38.462	89	CCTTCTGTGAACTGCAGGC	59.491	57.895	284	175	(CT)^10	195	Dinucleotide
HN7TS9H02DU5EC	ATGGCTGGGTCTGGGAAAG	60.08	57.895	99	ACACACTAAACCGTGTGCC	59.045	52.632	531	461	(AT)^8	477	Dinucleotide
HN7TS9H02DU9R1	TGCTACACCATGGCAGAGG	60.157	57.895	344	CAGTTCAGCAGAAACATTGCTC	59.184	45.455	588	493	(GT)^10	513	Dinucleotide
HN7TS9H02DUAV7	TCAACATGGAGTTCGGCTTTG	59.876	47.619	245	GCACTTGCATAGTCAGGAAGG	59.741	52.381	641	527	(AT)^8	543	Dinucleotide
HN7TS9H02DUFIK	GATCCCACAGAGGGTCCTG	59.547	63.158	33	CCGTGTTCACTGCAACCTAC	59.873	55	222	160	(AC)^9	178	Dinucleotide
HN7TS9H02DUVEQ	CGGACCACTGAAATGCACC	59.863	57.895	62	AGACTGACAAACTCGATCCTTG	58.84	45.455	493	369	(AC)^9	387	Dinucleotide
HN7TS9H02DUXJH	AGGAAATTCTTATGTCAAACTCCC	57.69	37.5	102	GCTCTGAGAAAGAACAATGTCAGG	60.609	45.833	328	173	(GT)^11	195	Dinucleotide
HN7TS9H02DUYR2	TGGCAAAGACGGATGCAAG	59.488	52.632	29	CCCTGCAAGAAGATGGACTTTG	60.272	50	450	312	(AC)^8	328	Dinucleotide
HN7TS9H02DVDI9	TGCCAACCAAGATACCTGC	58.492	52.632	199	GGCGCCATCAATAGCCAAG	60.084	57.895	396	295	(AC)^8	311	Dinucleotide
HN7TS9H02DVEPY	ACAGGGACCCACATAGAAAGG	59.865	52.381	171	TAGGTGGCTCTGAGGTGC	59.043	61.111	387	305	(AT)^10	325	Dinucleotide
HN7TS9H02DVL3L	TCCTGGAATGGGTTGGAGC	60.08	57.895	12	TGGGCAGGAAGAAGTGTCC	60.004	57.895	376	206	(AG)^9	224	Dinucleotide
HN7TS9H02DVMGS	GCCATTTCTGTGGTCAGCC	59.86	57.895	145	TGCATTCACGTGCAGTAGG	58.9	52.632	452	180	(CT)^12	204	Dinucleotide
HN7TS9H02DVRAV	GAGGCAAGCAGAACGCTG	59.858	61.111	192	CGTGGTGTGACAGGAGAAC	58.835	57.895	603	465	(AC)^8	481	Dinucleotide
HN7TS9H02DW0FU	AGGAGGACCAATTTCTTTGCC	59.243	47.619	54	AGGAGGGAGGAGGATACATTC	58.517	52.381	278	217	(AG)^8	233	Dinucleotide
HN7TS9H02DWC3C	CATCTGGGCAAGGTCCATC	58.647	57.895	162	CATCGCCACCCGCAATATC	59.865	57.895	475	341	(AC)^11	363	Dinucleotide
HN7TS9H02DWCPR	TGAACTGGCAGGACATTGC	59.106	52.632	92	ACTCCCTCGATTGTGTCAGG	59.864	55	323	153	(GT)^14	181	Dinucleotide
HN7TS9H02DWFO5	GCACATCTTACGGCAGGAC	59.351	57.895	26	GGCCTACCTCCCATCATCTG	60.079	60	325	229	(AC)^10	249	Dinucleotide
HN7TS9H02DWMHZ	AGGTTATCTGCCTTTGCTGTTAG	59.507	43.478	5	GACCCTCACAGGTCTGCAC	60.754	63.158	304	40	(GT)^12	64	Dinucleotide
HN7TS9H02DWPJP	ACAGCATCTCTGAGGCACC	60.157	57.895	109	GCCGTGAAAGCCTACGTTC	59.941	57.895	462	163	(AC)^11	185	Dinucleotide
HN7TS9H02DWY72	GAATGCCTGCTGTGTGGAC	59.862	57.895	100	TCTGAAGGTACCAGCTTTGC	58.572	50	474	371	(GT)^11	393	Dinucleotide
HN7TS9H02DX0MA	GGAGGTGTCCATTGATACAAGC	59.816	50	11	CCACCTTTGTGGCCTGGG	61.36	66.667	292	199	(AG)^15	229	Dinucleotide
HN7TS9H02DX4IA	GCTAGTCTCCATTGCTAGCTTC	59.366	50	45	ACTCGTAGACTCAGGGTTCC	58.925	55	315	103	(AC)^10	123	Dinucleotide
HN7TS9H02DXAWJ	TTTGGCACTGTTTGCTCAC	57.704	47.368	60	CCTGCATGTTGGGCTTCAC	60.158	57.895	254	133	(AC)^8	149	Dinucleotide
HN7TS9H02DXAXF	CCTTGTTCCTTTCCTGGCAC	59.794	55	341	GCTACGTTCACCAGCTTGC	60.231	57.895	776	400	(AC)^8	416	Dinucleotide
HN7TS9H02DXCID	GAGGGAACTAAGCCTTGCC	58.576	57.895	145	GCACCCACTGAGATGCTCC	61.202	63.158	457	335	(AC)^17	369	Dinucleotide
HN7TS9H02DXPZB	GCTCGGCATTCAGTACATCC	59.521	55	78	GCACCATAAAGATACCCTGCG	59.877	52.381	405	265	(AC)^8	281	Dinucleotide
HN7TS9H02DXUEU	TTGGCTAACCCATTGCCAC	59.095	52.632	88	GCTTCCCGTGTTCCAAACC	60.084	57.895	292	159	(GT)^11	181	Dinucleotide
HN7TS9H02DXUW0	GGATTGGATCAAGCCCTTAGC	59.529	52.381	96	GGGAACCATTGCACTCCAG	59.18	57.895	486	193	(AC)^12	217	Dinucleotide
HN7TS9H02DXXBW	GGGTACTAATTATAGCAAGACTGGG	59.313	44	89	AGAGCACCTGGAGTTGACC	59.701	57.895	284	193	(GT)^9	211	Dinucleotide
HN7TS9H02DXZPF	GCACCTGATTACCGACTGG	58.675	57.895	28	GGAAGGGCTCTTGGATGGG	60.539	63.158	198	100	(AC)^9	118	Dinucleotide
HN7TS9H02DY1K6	TGTCTCCAGCCCAATCTGAC	60.151	55	176	GCTGCACAGCACTTTCTAGG	59.942	55	443	308	(AG)^11	330	Dinucleotide
HN7TS9H02DY3K2	ACCCAATTGCACCATCTGC	59.477	52.632	367	CCCTAGTCCCTTGCTTGAG	57.579	57.895	591	528	(AT)^8	544	Dinucleotide
HN7TS9H02DY6T2	GGGAGATGTGTAGGCACCC	60.233	63.158	126	TCTCATCCTAGCAGCAACCC	59.934	55	317	227	(AC)^10	247	Dinucleotide
HN7TS9H02DY832	TCCATGGCTCTTCTGGGAG	59.157	57.895	10	AGTACCAAGCCTTCCTCTGG	59.493	55	431	228	(AT)^8	244	Dinucleotide
HN7TS9H02DY8PL	CTCTAGGCAGCTTCAGTTGG	58.729	55	16	CACCAGGGTCAGCAGGG	60.003	70.588	165	76	(GT)^9	94	Dinucleotide
HN7TS9H02DYAE4	GTGGAATGGCTTCCCATCAG	59.362	55	16	TCTGCCATCAGAGTGCTATC	57.561	50	381	242	(AT)^8	258	Dinucleotide
HN7TS9H02DYBAN	GCGTGAAGCTACCTTGTGC	60.231	57.895	217	TCTAGAACTGGGCATCTGGC	59.934	55	526	352	(AC)^8	368	Dinucleotide
HN7TS9H02DYGGW	CTAACTGGGTTTCAGCTGCC	59.583	55	305	GCTACATCACTTGAACGGGAC	59.745	52.381	589	467	(GT)^15	497	Dinucleotide
HN7TS9H02DYGO7	GAGCATTTCGGAGGATTGGG	59.44	55	111	CCACTTTGACACTACCAAGGAC	59.621	50	557	492	(AT)^10	512	Dinucleotide
HN7TS9H02DYITD	CTCTCGGGAGCTGAGTACG	59.717	63.158	241	CTGCTGGTGACTTCATGGAC	59.302	55	420	368	(AC)^10	388	Dinucleotide
HN7TS9H02DYL6R	TCCTTGTGACCATGCTGGG	60.386	57.895	353	CAGGTTTCAAGTTAATCAGGCAC	58.959	43.478	561	406	(GT)^14	434	Dinucleotide
HN7TS9H02DYRSC	GGAACAGGATTGTGCAGACC	59.583	55	162	GGTCTCATACCGTTGACTTACAG	59.334	47.826	581	493	(GT)^8	509	Dinucleotide
HN7TS9H02DYY2I	GAGGGATGAGTGACCAGGC	60.233	63.158	68	TAGGTTTGTCCACCTCGGC	60.082	57.895	476	325	(CT)^9	343	Dinucleotide
HN7TS9H02DYZDM	CTTGGGCTGCTGGTTGAAG	59.785	57.895	67	AGCCTAAACACGGTCAGGG	60.082	57.895	507	281	(AT)^9	299	Dinucleotide
HN7TS9H02DZ0UZ	GTGGAGAGAAACTGCTTTGGG	59.875	52.381	74	ACGCTCTCTGCAGCACTAC	60.527	57.895	349	275	(GT)^10	295	Dinucleotide
HN7TS9H02DZ298	TTGCCTCTGGCTGACTACG	60.158	57.895	218	TCTCCCATCAGCTCGGTTC	59.553	57.895	630	440	(AC)^10	460	Dinucleotide
HN7TS9H02DZASR	GTGTCTGGGCTTCATGTCTTAC	59.754	50	98	TGGCTGCTGTTGAATTGGC	60.083	52.632	498	332	(AC)^8	348	Dinucleotide
HN7TS9H02DZEM8	CGCCATGACTGTTTGCAGG	60.524	57.895	238	GCTGTTCCCAAGGCTGAAC	59.786	57.895	536	437	(GT)^8	453	Dinucleotide
HN7TS9H02DZL07	CCTGTTGGCCACTGTTTGG	60.008	57.895	52	ACCCGTCTAGTTGGGCATC	59.854	57.895	443	272	(GT)^10	292	Dinucleotide
HN7TS9H02DZLE6	TAGCAGATGTGGCTGTCCC	59.854	57.895	271	TCCACATTGATGCGTACACTTG	60.013	45.455	533	322	(AC)^10	342	Dinucleotide
HN7TS9H02DZOTV	CTCTCCTGGATCCCACAGC	59.93	63.158	247	CTAATCGTGATCCCTATATCATTCC	57.286	40	650	524	(GT)^8	540	Dinucleotide
HN7TS9H02DZOY2	GCCAAGGACATGGTATGGG	58.641	57.895	388	ACATAGGGCAACAGAAGGTG	58.267	50	542	491	(GT)^8	507	Dinucleotide
HN7TS9H02DZT88	CCAACCAGGCATAGTGCAG	59.262	57.895	180	GCCCTGCCAGTTTGAGTTC	59.786	57.895	354	214	(AC)^16	246	Dinucleotide
HN7TS9H02EA549	TCCCACAGCTTGCTCCATC	60.46	57.895	123	CTGACCAAAGTCATCAGAGCC	59.401	52.381	337	212	(GT)^16	244	Dinucleotide
HN7TS9H02EAAG1	AAGGCTTGGCTCCAAATTAAG	57.518	42.857	190	CCTGCAAGAGACCCACTGC	61.424	63.158	454	276	(AG)^8	292	Dinucleotide
HN7TS9H02EAAJ4	GGGCAAGGATCTAGAGGGC	60.005	63.158	123	AGTCAAGGATGCCCATTGTC	58.629	50	359	222	(AT)^19	260	Dinucleotide
HN7TS9H02EAAOF	GGTAAAGACTGCCTCAAGCG	59.662	55	96	GGCACACATGAAGAACACCTG	60.484	52.381	510	333	(GT)^8	349	Dinucleotide
HN7TS9H02EABPG	TATTGGCCGGAGCACCTAC	59.931	57.895	176	TCACATCTCACAGTAGTGAATTACC	59.143	40	509	440	(AC)^10	460	Dinucleotide
HN7TS9H02EAIGF	CACAAATGCCTGAGGTGCC	60.158	57.895	51	TTCACGGGTAGGGACGATG	59.557	57.895	385	320	(GT)^12	344	Dinucleotide
HN7TS9H02EAY2Y	TGGACCCACTGATCCCAAC	59.696	57.895	76	TTGCTTGCACACAGGCTTC	60.009	52.632	363	228	(AC)^10	248	Dinucleotide
HN7TS9H02EAY9Z	CACCTGAAGGTCTCAGAACAG	58.718	52.381	32	TTTACCCTTCGGCCTTTCG	58.511	52.632	188	114	(GT)^19	152	Dinucleotide
HN7TS9H02EB008	CATGGCAGGCAGTAACCAC	59.562	57.895	31	TCTTTATGCTAAGGCCATTCAAG	57.674	39.13	252	185	(GT)^12	209	Dinucleotide
HN7TS9H02EB06F	GTGGCAACTGGTAACTTCCTC	59.604	52.381	139	AGACACAGGAGCGTGTTGG	60.679	57.895	401	222	(GT)^8	238	Dinucleotide
HN7TS9H02EB1ZE	AGCTTGCTTGTGCAATGGAG	60.152	50	24	ACAATCCCACCTCGAAGCC	60.46	57.895	341	267	(AC)^16	299	Dinucleotide
HN7TS9H02EB9R5	AGCCATGGGTCCTGCATC	60.164	61.111	220	ACCTGTTCACTGCAAACTGTC	59.739	47.619	525	396	(AC)^11	418	Dinucleotide
HN7TS9H02EBAK0	TGCCTCTGTTGAGGGTAGC	59.778	57.895	151	CCCTTCCAATCGCCTTGAG	58.962	57.895	489	427	(GT)^13	453	Dinucleotide
HN7TS9H02EBFJJ	GGGCTAGCTATGAGCAGGG	60.082	63.158	99	GTGTCTCAAGTTCCAGCGTG	59.874	55	430	180	(GT)^9	198	Dinucleotide
HN7TS9H02EBLJP	CACAGTAGCCCAAAGCCAG	59.187	57.895	204	TGTTCAAGAAGTCAGTTCACGC	60.143	45.455	555	278	(AG)^8	294	Dinucleotide
HN7TS9H02EBOPQ	TTGGAAACAATCGAATCCTCG	57.374	42.857	7	CACAGCCTGCAGAAGTTACC	59.587	55	380	97	(AC)^12	121	Dinucleotide
HN7TS9H02EBQN3	AGCTTGCTTGTGCAATGGAG	60.152	50	92	ACAATCCCACCTCGAAGCC	60.46	57.895	403	335	(AC)^13	361	Dinucleotide
HN7TS9H02EBQW2	ATGTGTCCAGGGCCAACTG	60.691	57.895	155	GCGAGTGCCAATCAGAAGAC	60.013	55	485	230	(AC)^8	246	Dinucleotide
HN7TS9H02EBYYB	GTCCCTGATTGCTGCTTTCC	59.939	55	23	TCCCAGACAAAGGCATCCG	60.46	57.895	426	329	(AC)^11	351	Dinucleotide
HN7TS9H02ECBVT	GTCAGTAGTTTGGTCCAGTGC	59.607	52.381	165	GTCACTTCTAGATACTCGAAAGTAGG	59.134	42.308	561	447	(AC)^14	475	Dinucleotide
HN7TS9H02ECCYA	TGGGAGAAACACTAGGCAGG	59.787	55	105	TCTAGCCCAAGACTCCAACC	59.495	55	271	208	(GT)^12	232	Dinucleotide
HN7TS9H02ECD6Z	AGCTACAGAAATGTGCAAACTC	57.999	40.909	199	AGACTACACAGGTATACATTGGC	58.494	43.478	537	235	(AC)^16	267	Dinucleotide
HN7TS9H02ECJS7	CCTTCTCCACCCTGTGCC	60.403	66.667	47	GGGCAGGTCCTAGTTGTCC	60.157	63.158	272	173	(CT)^8	189	Dinucleotide
HN7TS9H02ED88V	ACCATGTGCTTAGTCATTGGTC	59.42	45.455	12	AACATTTGGAGTGCCATGC	57.526	47.368	296	124	(GT)^14	152	Dinucleotide
HN7TS9H02EDAHR	AGCAGCACAGGTTCCAAAG	59.028	52.632	373	ACGGGAAGTACAAGGTTTACAATAG	59.607	40	585	528	(GT)^8	544	Dinucleotide
HN7TS9H02EDAID	AGAGACACGGAAGGAAGCC	59.78	57.895	13	CTGCCAGCACTTGAAGCC	59.776	61.111	449	77	(AG)^9	95	Dinucleotide
HN7TS9H02EDCJ1	TTAAGCTGAGGCTCCACGG	60.157	57.895	286	TCCACTCCCTGCAAATGCC	61.069	57.895	626	325	(GT)^8	341	Dinucleotide
HN7TS9H02EDEB0	AGCACTTGCCCACATGAAG	59.103	52.632	98	TGAAGTGCGATAGCGTCTG	58.402	52.632	322	208	(GT)^9	226	Dinucleotide
HN7TS9H02EDKLA	TGAACTGGCAGGACATTGC	59.106	52.632	92	ACTCCCTCGATTGTGTCAGG	59.864	55	323	153	(GT)^14	181	Dinucleotide
HN7TS9H02EDMD2	TTGTCTCCCTGTGTAAGGC	57.42	52.632	10	CCGTCCCTCGTGCTTCTTG	61.476	63.158	225	119	(CT)^13	145	Dinucleotide
HN7TS9H02EDNPM	TTCCTAGCAGGTGATGCCC	59.851	57.895	174	GCAGGAAGGCTGGGAAAG	58.738	61.111	449	269	(AT)^11	291	Dinucleotide
HN7TS9H02EDO1E	TGCTGTATGAGAGGCAAGG	57.581	52.632	45	GGCAAGGGCCATCTAGAAC	58.651	57.895	448	172	(AT)^9	190	Dinucleotide
HN7TS9H02EDS6T	AGGTGTCAGAAAGGCAAGC	58.726	52.632	27	CTGCTACAATTAAAGAAGCTGTATC	57.101	36	258	192	(AT)^16	224	Dinucleotide
HN7TS9H02EDV7T	TGCGAGTATTTGTTGAGCCAC	59.945	47.619	190	GGAACCTTCATAACTGCCCTG	59.393	52.381	456	383	(AC)^8	399	Dinucleotide
HN7TS9H02EDXNF	ATGAACTAACAGAATATGTCCACC	57.274	37.5	34	ACCGTGTCAGCATACCTCC	59.856	57.895	184	96	(GT)^8	112	Dinucleotide
HN7TS9H02EE6YG	TCCTCCTTTGTTATTTCATGCTG	57.866	39.13	75	TTTGGCACAGGGTCTGAGG	60.31	57.895	324	130	(GT)^14	158	Dinucleotide
HN7TS9H02EE717	CTGTTCGCCTAAGCCATGC	60.012	57.895	368	AAACGGCAACGTATCTTATCC	57.173	42.857	527	452	(GT)^9	470	Dinucleotide
HN7TS9H02EEGXM	GAGGCTTTCCTTTGCAGGC	60.158	57.895	307	TGGAGCGACTTATCTAGCG	57.194	52.632	521	458	(GT)^17	492	Dinucleotide
HN7TS9H02EEHB9	GCATCTTCCTGCCCAAGTG	59.561	57.895	116	CTGGTCTGGCGACTGTAGG	60.232	63.158	485	381	(AC)^13	407	Dinucleotide
HN7TS9H02EEHRR	AGCAGCATGACTTCGATGG	58.668	52.632	140	TCCTTGTCAGGAACACAGGG	60.006	55	498	234	(GT)^11	256	Dinucleotide
HN7TS9H02EEXEI	TGAGGTGGTGAAAGTCAGG	57.338	52.632	50	GAGTTGAAGAGCCACAAGTCTG	59.949	50	484	318	(AT)^17	352	Dinucleotide
HN7TS9H02EF05C	GCAGCAGGTGTTTGCTGAC	60.743	57.895	240	TGATATGGATAAGGCAGTTGTTTC	57.829	37.5	619	449	(GT)^11	471	Dinucleotide
HN7TS9H02EF0J4	CCCAGGAGGGATCTCCAAG	59.233	63.158	53	CCGCGTGTCAGGGTACG	60.891	70.588	424	350	(AT)^8	366	Dinucleotide
HN7TS9H02EF0LR	TGGCTGATACGGAGCACAG	60.232	57.895	180	TGACCTTACTTGTGGAAGGAG	57.718	47.619	439	388	(AC)^9	406	Dinucleotide
HN7TS9H02EF4BZ	ATCCTGTTCAGGGTGGCTC	59.774	57.895	363	CGTCGTCACCTCCCTACTG	59.937	63.158	684	395	(GT)^9	413	Dinucleotide
HN7TS9H02EF7X0	GGATGTGGCCTTTCCGTTG	59.861	57.895	70	GGTTGCCACCATCTTACCC	58.873	57.895	315	251	(AT)^9	269	Dinucleotide
HN7TS9H02EFADC	AGGGAACACTGGTAGGTTAGAC	59.608	50	61	ACACAGGCCTTGCATGTTC	59.407	52.632	412	126	(AC)^9	144	Dinucleotide
HN7TS9H02EFHQF	AGCTTGCTTGTGCAATGGAG	60.152	50	24	ACAATCCCACCTCGAAGCC	60.46	57.895	341	267	(AC)^16	299	Dinucleotide
HN7TS9H02EFJQZ	CAGGCCCAATATTTCCCATCAG	59.877	50	75	TCACTGACCTCAGATCCTTTAC	57.693	45.455	386	262	(GT)^10	282	Dinucleotide
HN7TS9H02EFK9M	GCAAGAGGGATCCAAACAGC	59.939	55	17	GCCAGTCCCTGTAGGAAGG	59.853	63.158	464	63	(AG)^8	79	Dinucleotide
HN7TS9H02EFP35	GCTGGAATAAGCAGGGTGTC	59.369	55	78	GCTGGTCTTTCACAAGGCG	60.158	57.895	227	118	(GT)^11	140	Dinucleotide
HN7TS9H02EFQJ0	TTCTTGCCTCCAGGACACC	60.004	57.895	240	AACTCACGGAGTGGGTCG	59.694	61.111	479	334	(GT)^15	364	Dinucleotide
HN7TS9H02EFSVT	TCACTTGCTAACTGGGTACAG	58.084	47.619	373	ACAGCAGTTCTGGAATGTCTTG	59.619	45.455	618	549	(GT)^11	571	Dinucleotide
HN7TS9H02EFUQM	GGCACTTCCTTGTCCTCGG	61.125	63.158	24	GATTCCATCAAGCCCTGCC	59.33	57.895	298	145	(AC)^20	185	Dinucleotide
HN7TS9H02EFZBK	TGCTACACCATGGCAGAGG	60.157	57.895	344	CAGTTCAGCAGAAACATTGCTC	59.184	45.455	587	492	(GT)^10	512	Dinucleotide
HN7TS9H02EG2BE	TTGCTGGCAGATCCAGGC	60.8	61.111	30	GGCGATCCACGGTAGCTG	61.011	66.667	232	132	(AC)^16	164	Dinucleotide
HN7TS9H02EG4IO	TTGGGCTCATAAGTACAAACTG	57.116	40.909	70	ATGCCCAATTGTGAAGCCG	59.858	52.632	481	218	(AG)^8	234	Dinucleotide
HN7TS9H02EG9BW	TGATCCTTCAGTCGCCCTG	59.856	57.895	93	CTCTCTCGAGCAGGTTCCC	59.934	63.158	492	288	(CT)^11	310	Dinucleotide
HN7TS9H02EGAYM	GGCTCCAAACTTAGGTAAGGAAATC	60.419	44	168	AGTGAGGGCTGTGAGCATC	60.157	57.895	449	235	(AG)^8	251	Dinucleotide
HN7TS9H02EGCIB	CCAACCAGGCATAGTGCAG	59.262	57.895	180	GCCCTGCCAGTTTGAGTTC	59.786	57.895	352	214	(AC)^16	246	Dinucleotide
HN7TS9H02EGI96	AAGGAGCATGGGACTTCGG	60.157	57.895	206	AGCCTGGTCCATTTCCACC	60.387	57.895	600	443	(GT)^11	465	Dinucleotide
HN7TS9H02EGXZ4	GAATCACTGGGATGCAGAAC	57.239	50	18	GCTGTGAGATCTTTACCGGC	59.451	55	446	121	(GT)^10	141	Dinucleotide
HN7TS9H02EGYVY	AGGCTCACTTGGGACCTTG	60.004	57.895	148	TTGCCTAAATGCTCGGGTC	58.581	52.632	460	321	(AT)^11	343	Dinucleotide
HN7TS9H02EH1OR	GATTCCCTGGAAGCCATGC	59.33	57.895	202	GCTGCATATCCAAGGCCAC	59.711	57.895	604	449	(AT)^9	467	Dinucleotide
HN7TS9H02EH2IR	CCTGCCAGCTCCCACAG	60.421	70.588	143	CAGCGATGCTGGACTCAAC	59.647	57.895	484	302	(AG)^10	322	Dinucleotide
HN7TS9H02EH65I	AAGCACTCCTGGACACTGC	60.684	57.895	26	TTGCTGGGAGGCAATGGTG	61.372	57.895	263	129	(AC)^8	145	Dinucleotide
HN7TS9H02EH99W	TGCCTCTGTTGAGGGTAGC	59.778	57.895	151	TCGCCTTCGAGTAGGTGTC	59.565	57.895	481	427	(GT)^13	453	Dinucleotide
HN7TS9H02EHRLQ	TGGCAGTCTTCCCTTGGAG	59.698	57.895	21	GCTGCTGTTTGGGTAGCAG	59.862	57.895	456	117	(AG)^14	145	Dinucleotide
HN7TS9H02EI0ZA	GGCAATCATACCAGGCCAC	59.332	57.895	200	TGCACCAGACTGACCAACG	60.975	57.895	415	298	(GT)^16	330	Dinucleotide
HN7TS9H02EI3PK	TCCCTTGGCAGCCTGTTTC	60.993	57.895	265	ACGCTACCACCCACTGAAG	60.082	57.895	582	404	(GT)^8	420	Dinucleotide
HN7TS9H02EI8M4	CTGAACAGAAGTGGGCAAGG	59.511	55	39	AACTGCAGATGCTCCCACG	61.127	57.895	288	145	(AG)^11	167	Dinucleotide
HN7TS9H02EIH9V	GGTGGATTTCTGTTGCAGCC	60.506	55	52	GGCTCCCATTCTTGTTCGC	59.937	57.895	210	151	(AT)^9	169	Dinucleotide
HN7TS9H02EINSG	CCAGTATGCAGCGTTCACC	59.645	57.895	21	ACACGTCATCAGCGATTTGG	59.662	50	385	322	(AC)^17	356	Dinucleotide
HN7TS9H02EIS6G	GACCTCAGGCTGGAACTGG	60.459	63.158	49	TTTGCTGGCGATGAACTGC	60.158	52.632	378	153	(GT)^9	171	Dinucleotide
HN7TS9H02EJ005	AGGGCCTTGCTTAGGTCATC	60.224	55	88	TGAGTGGTCCGTGAGATTCC	59.864	55	497	165	(GT)^8	181	Dinucleotide
HN7TS9H02EJ3UR	GGAAGGTTGCGCTGAAAGG	60.158	57.895	49	GTGCAGGTATGGTGTTGCC	59.861	57.895	330	211	(AC)^11	233	Dinucleotide
HN7TS9H02EJ7BQ	GAAGTCATGCACCTTCTGCC	59.94	55	108	CTGGGTGGGATCACAGAGG	59.853	63.158	438	297	(AT)^8	313	Dinucleotide
HN7TS9H02EJ936	AAATGTTTATGCCAGCAGAGG	57.603	42.857	18	GTCGAGGCTCAAGATACTTGTC	59.309	50	217	127	(GT)^15	157	Dinucleotide
HN7TS9H02EJASC	ACAATTCTTCTCTGTAGGTAGCG	58.763	43.478	254	TCTCTGTGCAACCTTGACATC	58.987	47.619	612	353	(AC)^10	373	Dinucleotide
HN7TS9H02EJOU1	GGTCCCAGGGTGGCTTAC	60.084	66.667	9	CTCTACCATTAACAGCCTACAGC	59.39	47.826	435	268	(GT)^8	284	Dinucleotide
HN7TS9H02EJSPK	GCCAGCATGACCAAAGGAC	59.86	57.895	266	CACATTTAGTGCAAAGTTGAGCC	59.769	43.478	522	468	(AT)^8	484	Dinucleotide
HN7TS9H02EJV3S	TGAGCTTGCTGGGAACCTG	60.687	57.895	93	GCAAACCCTGTGGTTCCTG	59.709	57.895	277	125	(AC)^13	151	Dinucleotide
HN7TS9H02EJVGQ	CTGCAACGGGAGAAATTTGG	58.39	50	4	GCTTGCAGTGATACGGTGC	60.304	57.895	373	41	(AG)^17	75	Dinucleotide
HN7TS9H02EJXR7	TTGGGAGAGAGGCCTGTTG	59.698	57.895	115	GCCTGACTTTGCCAGGTTC	59.786	57.895	551	431	(GT)^13	457	Dinucleotide
HN7TS9H02EK509	TGGAACAGTAGACTGACCAAGG	60.141	50	31	AGCCCATTCCTATCAAAGGTG	58.471	47.619	248	138	(AC)^12	162	Dinucleotide
HN7TS9H02EK6YV	TCCCATCTGCTCCAAGAACC	60.151	55	325	CTGTTTCCACCCGCCTTTC	59.787	57.895	545	373	(GT)^8	389	Dinucleotide
HN7TS9H02EKJ1X	GTCAAATGACCACATGAATTGACAG	59.902	40	66	GCCCATGTCACTACGAAGC	59.351	57.895	336	178	(GT)^15	208	Dinucleotide
HN7TS9H02EKMTB	TGGCAATTTCTGATGGGCG	59.559	52.632	43	TCTGCAGTGGAGCCAAGTC	60.383	57.895	437	291	(AG)^9	309	Dinucleotide
HN7TS9H02EKOM8	GTTGATCATGGATGGAGCCC	59.145	55	15	GAACCTGTTTGGAGCACCC	59.409	57.895	368	248	(AC)^8	264	Dinucleotide
HN7TS9H02EKOZB	TGTCAAGTGAGGTTCCGGC	60.681	57.895	40	GCTGTCTCCAAACCGCAAG	60.158	57.895	293	112	(AC)^12	136	Dinucleotide
HN7TS9H02EKTQ0	CAGAGGTGCCCATGGAATTG	59.65	55	36	AGCACAGCAGTCATAACAAGTG	59.948	45.455	344	163	(AC)^10	183	Dinucleotide
HN7TS9H02EKWX3	GCCATGTCTCAACACCACTTTC	60.786	50	390	ACCACGTATTGAGCGTTTGC	60.222	50	562	439	(AC)^9	457	Dinucleotide
HN7TS9H02ELBEH	TGTCTCCAGCCCAATCTGAC	60.151	55	176	GCTGCACAGCACTTTCAGG	60.451	57.895	446	308	(AG)^11	330	Dinucleotide
HN7TS9H02ELE2B	AACCCTCTGCTTTCCAGGC	60.691	57.895	206	CGTACACTGCACTCGTTCC	59.292	57.895	634	272	(AC)^9	290	Dinucleotide
HN7TS9H02ELPEG	GCTCGGCATTCAGTACATCC	59.521	55	78	GCACCATAAAGATACCCTGCG	59.877	52.381	405	265	(AC)^8	281	Dinucleotide
HN7TS9H02ELQ2V	GCCGTGTATTCCTAAACATCTAC	57.851	43.478	0	GGGACGGGTATCTTGGGAC	59.93	63.158	437	36	(GT)^8	52	Dinucleotide
HN7TS9H02ELVOE	GTCCAGAACAATAGCCACGG	59.376	55	52	AACCCATCCTGGGACCATC	59.457	57.895	429	358	(GT)^12	382	Dinucleotide
HN7TS9H02EMFKT	GTGTCGCAGGAGACGGC	61.214	70.588	26	AGCTGTTCCCGTTGCCC	60.672	64.706	182	81	(CT)^9	99	Dinucleotide
HN7TS9H02EML9G	GACCTCAGGCTGGAACTGG	60.459	63.158	49	TTTGCTGGCGATGAACTGC	60.158	52.632	377	153	(GT)^9	171	Dinucleotide
HN7TS9H02EMLN6	TGCCTCCTTCCTTGAGTGG	59.698	57.895	176	AGTTCTGGACTCAACATGCC	58.568	50	426	344	(AC)^12	368	Dinucleotide
HN7TS9H02EMMW3	GCATACTGGGAAACTAGCTGAC	59.559	50	2	AGATGTAGCATTTAGCACACTGG	59.573	43.478	185	99	(GT)^10	119	Dinucleotide
HN7TS9H02EMPQN	GGCAAGTCACCATGCAGTC	59.862	57.895	60	ATGCCTATCTGTCAGCGGG	60.006	57.895	489	363	(CT)^8	379	Dinucleotide
HN7TS9H02EMSM5	CCAGATTGCTGCTTGACGG	59.938	57.895	82	CAATCCCTCTGCGCATACC	59.12	57.895	513	410	(AG)^9	428	Dinucleotide
HN7TS9H02EMU57	TCCACATTCAGCCAGGGAC	60.081	57.895	14	TTCACACTGCCAGATCCCG	60.458	57.895	354	242	(CT)^8	258	Dinucleotide
HN7TS9H02EMW3N	ATCTACAGACCTCTGCTAACTG	57.501	45.455	84	AAATACAGAGTGCTATACTGAGTTG	57.463	36	499	429	(AC)^10	449	Dinucleotide
HN7TS9H02EN5QK	ACAAGGACTAGAAGGGCTCC	59.199	55	189	ACCTTTCCGGCTCACAGTC	60.383	57.895	603	394	(AC)^12	418	Dinucleotide
HN7TS9H02ENKQB	GGGAGAAGGGTGATCCAGC	60.233	63.158	12	GGGATACAGGCAGGATGGG	60.004	63.158	433	112	(AC)^13	138	Dinucleotide
HN7TS9H02ENNKN	AAATCCCACAAAGCTGCAC	57.451	47.368	246	TCGCCCTTCAGAGTATATGGC	60.146	52.381	475	325	(AC)^8	341	Dinucleotide
HN7TS9H02ENPLB	TTGGGAGAGAGGCCTGTTG	59.698	57.895	115	GCCTGACTTTGCCAGGTTC	59.786	57.895	557	433	(GT)^13	459	Dinucleotide
HN7TS9H02EO0ZG	TGTTCCACATAAATTCATCGACC	57.95	39.13	65	TGGCCCTCCACCCTTATTG	59.769	57.895	359	146	(AC)^14	174	Dinucleotide
HN7TS9H02EO5ON	TGGCCAGTGTGGAAACACC	61.217	57.895	103	ACAGGAGGATGCAAATGCC	58.867	52.632	491	358	(AC)^13	384	Dinucleotide
HN7TS9H02EOFIB	TGCCCTCAGTTCAGCCTAC	59.778	57.895	211	TGGATCGTCCAGGCTTCAG	59.856	57.895	659	531	(AC)^8	547	Dinucleotide
HN7TS9H02EOH87	TGCCTATGGGTGTTATGATCTTC	58.803	43.478	192	GGCACCTGGAATGTGCAAG	60.158	57.895	423	298	(AC)^11	320	Dinucleotide
HN7TS9H02EOM0U	AGCAAGGTTTGGATCAGTTTC	57.467	42.857	25	TCCGGGATCAATTATGCGAC	58.586	50	230	56	(AG)^8	72	Dinucleotide
HN7TS9H02EOUQ8	CATGGCAGGCAGTAACCAC	59.562	57.895	31	TCCCTCTGTGAAGGATGCAG	59.861	55	381	185	(GT)^12	209	Dinucleotide
HN7TS9H02EOVQS	GCGTGATCTTTGGAGCTGG	59.643	57.895	7	GCTGCTTTAGGAGCAATGG	57.407	52.632	445	317	(AC)^11	339	Dinucleotide
HN7TS9H02EOZEV	TGCTATGATGCAAATTCCTACC	57.31	40.909	125	AGTTGGCAGTTGGCAGAAC	59.332	52.632	537	261	(AT)^8	277	Dinucleotide
HN7TS9H02EP14O	CTGGTTTGCAGGCATGGAC	60.158	57.895	223	CAGGACTACCAAGGGCAGG	60.157	63.158	525	259	(AC)^10	279	Dinucleotide
HN7TS9H02EP3O6	AGTGACTGCCCTCATGTAGC	60.224	55	105	TGTCATGAGTTTAAAGACCCTTC	57.232	39.13	370	202	(AC)^18	238	Dinucleotide
HN7TS9H02EPD90	CTGCAAGTGCCAGGAAGAC	59.491	57.895	126	CTCTCGGCAGCCACCTC	60.171	70.588	435	260	(AC)^8	276	Dinucleotide
HN7TS9H02EPVIK	GCTGCTGGTGGCAGATTTC	60.232	57.895	62	ACATCTGTCCATAACATACGTGTC	59.416	41.667	217	162	(AC)^9	180	Dinucleotide
HN7TS9H02EPVKV	GTCGGAGTTCCACCTAGCC	60.232	63.158	76	TAGCCTCCCAGCACTAAGC	59.549	57.895	262	120	(AC)^8	136	Dinucleotide
HN7TS9H02EPXII	ACTGCACAGCTTTGGTTGAC	60.01	50	173	CAGGGAAGAGGCAGCAAAC	59.486	57.895	451	367	(GT)^10	387	Dinucleotide
HN7TS9H02EQ7ZI	CCGCAACAATGGTATGCCC	60.306	57.895	106	GCCCGCGCGTGTATTAAG	60.089	61.111	356	302	(AG)^12	326	Dinucleotide
HN7TS9H02EQ97P	CCCAGCTATTACCGATTGTGC	59.877	52.381	98	ATGTCATGCTTTAGGAACATGG	57.505	40.909	309	150	(AC)^9	168	Dinucleotide
HN7TS9H02EQ9OP	CACACACTGGTTCCAGACC	58.739	57.895	75	GGTGCAAAGTGGGCATCAG	60.158	57.895	266	166	(AC)^18	202	Dinucleotide
HN7TS9H02EQC0T	TGGTAACGACTGGCAAGGG	60.384	57.895	80	CACTCACATAGCATCCGGC	59.127	57.895	237	132	(AC)^17	166	Dinucleotide
HN7TS9H02EQDBA	CCTCCAACCATATTCCTTCCC	58.543	52.381	254	TTCCCTTCCTTGAAGATAAATGC	57.596	39.13	441	381	(AG)^10	401	Dinucleotide
HN7TS9H02EQFIS	TTGCATGCGATAGTGCTGG	59.344	52.632	69	GCCAGTTTGCCTTCTTCCC	59.783	57.895	401	135	(AG)^12	159	Dinucleotide
HN7TS9H02EQPQS	TGAGGGAAGGCTCATTATGTC	57.923	47.619	12	GGAGAAATCCTTGCGTGGC	59.937	57.895	177	44	(CT)^11	66	Dinucleotide
HN7TS9H02EQT0E	TGAGTCTCCAGAGATGTGCC	59.574	55	6	TGCTGTCACTAGGCTTCCAG	60.152	55	322	177	(AC)^9	195	Dinucleotide
HN7TS9H02EQZJV	AGACTGTGGGATGTGACAAG	57.913	50	67	GAGGCACCAAGCCCTACC	60.482	66.667	249	98	(GT)^12	122	Dinucleotide
HN7TS9H02EQZPT	GCCATCCCTAATTGCCCAC	59.326	57.895	77	AGCTCTGTGGCAGAACCTC	60.082	57.895	328	123	(AC)^13	149	Dinucleotide
HN7TS9H02ER1BK	CAGCAAGAACGAATGGGCG	60.594	57.895	260	CATTGGTGCCACAGAAGCC	60.158	57.895	497	297	(AC)^10	317	Dinucleotide
HN7TS9H02ER1YF	CAAGTTGGGTTGACAGCGG	60.084	57.895	19	AGGTACTGGTCCGGGTGAG	61.074	63.158	250	141	(CT)^9	159	Dinucleotide
HN7TS9H02ER4GZ	ACTCTTCACTGGACTGGTGC	60.367	55	175	TAGAGTGCCTCCTGGTTCC	58.775	57.895	369	270	(GT)^8	286	Dinucleotide
HN7TS9H02ER72V	TTTGGACAGGAGCAAGCC	58.251	55.556	119	CCCACGATGCTAATGTCTGG	59.161	55	432	219	(GT)^12	243	Dinucleotide
HN7TS9H02ER7AS	CCTCCATTCAGTGTGTTTCACC	60.207	50	39	GGAGCAAGCCATGCACTTC	60.232	57.895	437	84	(AC)^9	102	Dinucleotide
HN7TS9H02ER7I1	AGAGAGTGCATAAGGGTAGGC	59.73	52.381	4	TCCTTGGGACAATGCCCTG	60.387	57.895	275	176	(GT)^10	196	Dinucleotide
HN7TS9H02ERKMG	TGGACTGAGATACTGGTGGC	59.571	55	26	TCCTGCCTCCCTGACAAAG	59.698	57.895	357	140	(GT)^8	156	Dinucleotide
HN7TS9H02ERLVT	GCTTATGCTGTTTGAAGATGGAAC	59.66	41.667	198	GCAAAGTGCTATTCTGCCTCC	60.349	52.381	424	262	(AC)^9	280	Dinucleotide
HN7TS9H02ERW91	TGTGCTGTGTGACTTAACGC	59.804	50	230	TTGCTGATGTGTTATCAGAAGG	57.192	40.909	608	430	(GT)^8	446	Dinucleotide
HN7TS9H02ES47Q	TGCCAACTTCTCATTTGCCC	59.792	50	363	TGCTGCACTTTGGATGTAATG	57.9	42.857	588	403	(GT)^8	419	Dinucleotide
HN7TS9H02ES85C	AGAGTACAGTGTTTGGTAAAGGAC	59.165	41.667	69	ATGGACCCACCATCTCCTG	59.15	57.895	355	137	(AC)^16	169	Dinucleotide
HN7TS9H02ESGCC	ACTGTATCTACTTCAGTCCAGC	57.772	45.455	89	AGTGCCTTAGCCTTCTGCG	60.829	57.895	257	143	(AC)^13	169	Dinucleotide
HN7TS9H02ESPWT	GCTTAGTCCAGCTTCTTGCAC	60.281	52.381	326	AGTTCGAAGGAGCAATTGGG	58.931	50	548	388	(AC)^8	404	Dinucleotide
HN7TS9H02ESRQG	TGCATTGAAATTTGGGCACC	58.574	45	151	GCTGCTCCATGGGTATAGAGG	60.49	57.143	426	326	(AT)^10	346	Dinucleotide
HN7TS9H02ESUCC	TTCCTTGCCTTGGGTCCAG	60.31	57.895	146	AGCTCCAAACCATGATGCC	58.867	52.632	392	327	(AG)^8	343	Dinucleotide
HN7TS9H02ET4NA	CGCCAGAGCTTCAACTTCC	59.57	57.895	86	ACTGTTTCTCTGTGCCAAGC	59.44	50	469	155	(GT)^10	175	Dinucleotide
HN7TS9H02ET5O2	GACCACGGCCCATCTAGTC	60.307	63.158	142	ACTCAAGTGGAGGAAGGCTG	60.079	55	517	408	(AC)^14	436	Dinucleotide
HN7TS9H02ET65N	TCTTACAAACACATGAATGGACG	58.151	39.13	8	AGAAGTGGGTAATTCTGCTTGC	59.682	45.455	361	47	(AC)^13	73	Dinucleotide
HN7TS9H02ET6EB	AAACTCCAAACAGGCGCAG	59.712	52.632	36	GAAGCGCCTCCATTATCCC	58.813	57.895	310	125	(CT)^12	149	Dinucleotide
HN7TS9H02ET7ZO	TGCTCTTGCCTAAGGACCC	59.775	57.895	58	TACATGCGCTTGGAAGGTG	58.892	52.632	491	314	(GT)^8	330	Dinucleotide
HN7TS9H02ET8KP	TGCTGGTGTCCAGTTTGGG	60.916	57.895	178	TGCCCAGCTCTATGTGACC	59.854	57.895	453	310	(AG)^9	328	Dinucleotide
HN7TS9H02ETD4Z	GCATGCCGGTTACTTGGTC	59.937	57.895	177	CTCGTGTGATCCACCCTCG	60.599	63.158	500	414	(GT)^16	446	Dinucleotide
HN7TS9H02ETR79	TTGAGGCAGCTGTGCTAGG	60.459	57.895	12	GGACAGGATGGGAGAACCG	60.233	63.158	401	289	(AG)^9	307	Dinucleotide
HN7TS9H02EU383	GCTGAAATGTGCATTCGATAATAAGC	60.67	38.462	97	AGAGAAGGCCACTGGTGC	60.004	61.111	348	164	(AC)^9	182	Dinucleotide
HN7TS9H02EU7MR	TCCCAGAGCCTTTGTCACC	60.004	57.895	43	ACTAGGCACAGCTGGTAGG	59.166	57.895	413	330	(GT)^9	348	Dinucleotide
HN7TS9H02EU9Y4	GCTCTCTTGCACCATAAGCC	59.728	55	119	GCGACAAACCCATTGAATCTTAC	59.34	43.478	496	272	(AC)^9	290	Dinucleotide
HN7TS9H02EUBNT	ATGCTGTGCAGCCATTCAG	59.559	52.632	123	CAGGCAGTGCGTTACCTTC	59.572	57.895	486	415	(AG)^11	437	Dinucleotide
HN7TS9H02EUDWN	TTTCCCACGCTACCGAGAC	60.158	57.895	357	TCATCAAGATTGGGCACTACTTTC	59.831	41.667	525	440	(AC)^12	464	Dinucleotide
HN7TS9H02EUDYW	CTTCCTCTGAGTCCTGCCC	59.855	63.158	332	TATGGTTCCTGGTTCCTGC	57.476	52.632	576	508	(AC)^12	532	Dinucleotide
HN7TS9H02EUH9I	GAACGGGACCAAAGGGTTG	59.411	57.895	321	ATCACTGTCACCTGGAGCG	60.158	57.895	573	522	(AC)^10	542	Dinucleotide
HN7TS9H02EUN6S	GCTGGCACTGTTCATGGTG	60.158	57.895	202	TGTCAACCTGGTCACCTAC	57.039	52.632	485	440	(AC)^8	456	Dinucleotide
HN7TS9H02EUNN8	TCAGGAAACCCAATGAAGTCC	58.617	47.619	206	AGTACTCTCCGACTTGACAGC	59.943	52.381	506	360	(AC)^13	386	Dinucleotide
HN7TS9H02EUT9G	CTGCATACCACATCCTGCC	59.036	57.895	176	GCGATTGTGCTGACATAGTCC	60.147	52.381	359	210	(AC)^9	228	Dinucleotide
HN7TS9H02EV2GM	TCATTTACTTTGACTGTGGGAGC	59.697	43.478	101	TTCCCAGGCTACTCCTTGC	59.775	57.895	540	138	(AC)^9	156	Dinucleotide
HN7TS9H02EV6IT	ACGCATATGTTCTGCAGCC	59.343	52.632	272	TACCACGTGACTAGGAGCG	59.268	57.895	710	431	(GT)^11	453	Dinucleotide
HN7TS9H02EV8YM	GTCAAATGACCACATGAATTGACAG	59.902	40	66	GCCCATGTCACTACGAAGC	59.351	57.895	344	178	(GT)^14	206	Dinucleotide
HN7TS9H02EVACT	GCTCACAAGTGCTGAATCCC	59.94	55	153	TCAGAAGTTCGGCCTTATCC	57.775	50	405	331	(AC)^10	351	Dinucleotide
HN7TS9H02EVGFY	GGTGAAGCTGAGAAGCCAAG	59.585	55	85	GCATTCATGTTGGGCCTCC	59.933	57.895	431	198	(AC)^10	218	Dinucleotide
HN7TS9H02EVI4A	AAAGTCGCAAAGATGGCAG	57.261	47.368	25	TGTGCAGGACTCCGTAAGC	60.455	57.895	188	58	(AC)^11	80	Dinucleotide
HN7TS9H02EVKER	CCCAGGATGCCTCTGACC	59.844	66.667	175	GCCTTTCCAGAATGCTGTGG	60.223	55	411	351	(AG)^9	369	Dinucleotide
HN7TS9H02EVOAV	TCATCTTTCGTCTACTGGCAAAC	59.766	43.478	64	GGAAGGCATAGAAGGTGCC	58.651	57.895	314	121	(GT)^9	139	Dinucleotide
HN7TS9H02EVOBT	AGAAATTGGTCTATAGTTCTTTGGC	58.145	36	141	CAGCAAATGATGGATTGCATACTG	59.778	41.667	320	241	(AT)^11	263	Dinucleotide
HN7TS9H02EVQ5N	ATGCATTGTGGTCAAGGGC	59.477	52.632	35	CGTTGTGGAAGTCGAACGC	60.515	57.895	482	406	(GT)^9	424	Dinucleotide
HN7TS9H02EW06Z	TGCTTCTGTGCAAGATTAGC	57.17	45	29	GCCATGTGCCAAAGTCAAC	58.536	52.632	469	68	(GT)^13	94	Dinucleotide
HN7TS9H02EW0KE	GAATCGTGACTTCTGCGGG	59.356	57.895	181	CTCTTGGGAACAGCCTGGG	60.763	63.158	335	271	(GT)^10	291	Dinucleotide
HN7TS9H02EWDF3	GCACTGGGAAAGCTTGTGG	60.083	57.895	52	ATCCATCTGGGAGTGCAGG	59.542	57.895	207	107	(AC)^8	123	Dinucleotide
HN7TS9H02EWGDC	CCCAATTCAACAAACTCTGAATAC	57.264	37.5	15	CAGACTGTCAAGGACCAAAGC	59.877	52.381	393	53	(CT)^8	69	Dinucleotide
HN7TS9H02EWK6Z	CAGCATCCATGAGACTTGCG	60.083	55	376	GGATGCAGCTTATACCAGCC	59.225	55	585	406	(AC)^11	428	Dinucleotide
HN7TS9H02EWW59	TCCCAGGGCAAGTCACAG	59.6	61.111	86	CACCTGTTTCTTCCTGCCC	59.106	57.895	334	159	(AC)^14	187	Dinucleotide
HN7TS9H02EXC5G	ATTGGGCAGAAGGCATCAC	58.867	52.632	425	AAAGTCCGAGGTGCAGTGG	60.683	57.895	602	528	(AC)^9	546	Dinucleotide
HN7TS9H02EXJMV	AGGAAGTGGTAATCCAGCAATAG	58.736	43.478	0	AGGGAAGTTGGCAGAAGGG	60.003	57.895	396	43	(CT)^8	59	Dinucleotide
HN7TS9H02EXT53	GACCAAGGCGTCCATGTTG	59.863	57.895	19	TTGGTGGGCAAAGCACTTG	59.932	52.632	421	86	(GT)^13	112	Dinucleotide
HN7TS9H02EXZ8C	TTCCACCTCCACTAGGAAATC	57.49	47.619	79	TCATGGCCAAATGGACGAAAG	59.942	47.619	520	417	(AC)^11	439	Dinucleotide
HN7TS9H02EYL5R	GGCTCACTGAAGAAACCCG	59.196	57.895	152	TGGCAACAGCATCTAAAGTCC	59.325	47.619	304	220	(AC)^10	240	Dinucleotide
HN7TS9H03F05BN	TTGTACACGCAAGCTGAGG	58.826	52.632	21	TCTGGTACTTGGAGGTTGCTC	60.146	52.381	220	141	(CT)^9	159	Dinucleotide
HN7TS9H03F0PQR	GCACAGGATCTTGGGATGC	59.336	57.895	95	CCATTCTTGCTCAGGACACC	59.296	55	451	217	(AC)^8	233	Dinucleotide
HN7TS9H03F1A2W	GGATTAACCCTTTCCTCGCC	59.079	55	44	AATCAAAGCGGCATCAGGG	59.255	52.632	283	190	(AC)^10	210	Dinucleotide
HN7TS9H03F1EBE	AGCACTCGAAGGATGGGTC	59.856	57.895	273	GTTTGCTTGCAGAAGTTGGAG	59.009	47.619	583	536	(AC)^8	552	Dinucleotide
HN7TS9H03F1NW3	TCAGGAGTGAGATGCTGCC	59.855	57.895	395	AAGGACTCAGAGAGCTGCC	59.474	57.895	544	442	(AG)^8	458	Dinucleotide
HN7TS9H03F1O8N	TGATGGGCAGGAGAATGCC	60.539	57.895	34	ACCCAGTTCCATCACAAGC	58.411	52.632	269	176	(GT)^12	200	Dinucleotide
HN7TS9H03F1VUW	CACTCTGAGGGCAGCCAG	60.479	66.667	15	GGTCCAGTCCACCAAGAGG	60.081	63.158	229	45	(GT)^10	65	Dinucleotide
HN7TS9H03F22N8	GGGCCAGGAGACTTACCTC	59.549	63.158	9	GGAAGCTTTAGGCCCATCC	58.64	57.895	418	39	(AC)^13	65	Dinucleotide
HN7TS9H03F263B	TTATTATCTGACCTGCCTGGG	57.629	47.619	9	CAGCCTTCCATAAGCTGACC	59.081	55	399	46	(GT)^12	70	Dinucleotide
HN7TS9H03F27QV	AGAGTGTTGCTGATTGGTTCAC	59.881	45.455	72	AGCTATCAGAATCGCAGGC	58.142	52.632	404	228	(AC)^8	244	Dinucleotide
HN7TS9H03F2I38	TGCAAAGCATCCCAAGGAC	59.099	52.632	44	TTAAAGGCCACAACCATGC	57.137	47.368	219	160	(AC)^8	176	Dinucleotide
HN7TS9H03F2IMI	GAGGTGCCCACTCTAGCC	59.847	66.667	33	GGAGGAGGAACAGATCCCTAATG	60.455	52.174	241	179	(AC)^10	199	Dinucleotide
HN7TS9H03F2YAK	ATGCCTCAGAAAGGTCAGC	58.189	52.632	57	ATAACTTCTTATCTTTCCATAGCCC	57.24	36	420	304	(AG)^8	320	Dinucleotide
HN7TS9H03F388U	ACTCACCTTAAGAATAAAGAACTGG	57.554	36	33	TCTCGATTGCACCAGGGAC	60.157	57.895	225	155	(AC)^13	181	Dinucleotide
HN7TS9H03F3LSW	GTGTTGCAAGGGAGACGC	59.78	61.111	185	TGCTGTCCAGTCACCTTGG	60.309	57.895	348	237	(GT)^8	253	Dinucleotide
HN7TS9H03F3U29	GGCAGAAATCGGAACAGGC	59.937	57.895	110	CCGCCTGAAACCCAGTCAG	61.421	63.158	509	414	(AC)^8	430	Dinucleotide
HN7TS9H03F3YIZ	TATATGCCGCCCTTGAGCC	60.384	57.895	122	TGAGCCTGCAGAATTTGAGATG	59.75	45.455	517	409	(CT)^8	425	Dinucleotide
HN7TS9H03F4FHN	TTTCCATTGGCAGGCATCG	59.559	52.632	145	TGCTGTGACCCTGTGATCC	60.081	57.895	474	357	(GT)^8	373	Dinucleotide
HN7TS9H03F4G79	GTGCAGACCTGACCTTCAAC	59.516	55	53	AGCTCATGGATATGTGCCAG	58.198	50	286	93	(AG)^11	115	Dinucleotide
HN7TS9H03F4MEJ	TTCCTTTCGTGCACATCCC	58.808	52.632	149	GGCTCCAGCACAAATCCTC	59.261	57.895	409	222	(AC)^8	238	Dinucleotide
HN7TS9H03F4RE9	TTTCCCACGCTACCGAGAC	60.158	57.895	357	TGACTCAAGGCACTCCACC	60.006	57.895	549	441	(AC)^12	465	Dinucleotide
HN7TS9H03F4WOU	GGCTCAGTGTGTGGAAGAAC	59.516	55	5	CCAAGGGTGCATTCTGAGG	58.876	57.895	247	121	(CT)^8	137	Dinucleotide
HN7TS9H03F511G	CCTACGCAAGATCTGGAAAGC	59.811	52.381	190	GAAGGCCACTTTGCCCATAC	59.938	55	345	222	(AC)^8	238	Dinucleotide
HN7TS9H03F54AD	GCTCCATGTCCCACTAGGC	60.609	63.158	309	GCACACATGCACTTCTTGG	58.248	52.632	568	501	(CT)^9	519	Dinucleotide
HN7TS9H03F55QY	GGCAGTCCCAACAAAGTGC	60.38	57.895	188	GTCTGCGCATAACACGTCC	60.015	57.895	574	262	(CT)^8	278	Dinucleotide
HN7TS9H03F56GO	GAGTTTGAGACGGCACAGG	59.202	57.895	386	GGTGGGCCAGCAACTATG	58.821	61.111	593	472	(GT)^16	504	Dinucleotide
HN7TS9H03F5CZI	GATGCCACGTGCACTCAAG	60.231	57.895	28	ACCAAGACACAAGCCAATAAGG	59.614	45.455	272	177	(GT)^16	209	Dinucleotide
HN7TS9H03F5PP7	TCTGTTGACATCCAAGCACG	59.234	50	164	AGGCAACGCAGAATGTACC	58.891	52.632	368	297	(AG)^8	313	Dinucleotide
HN7TS9H03F5TRC	GCAATGCAGGTAGAATGCG	58.189	52.632	171	ACTATGGATGGCAGGGCTC	59.62	57.895	328	249	(AC)^8	265	Dinucleotide
HN7TS9H03F6B89	TGAAGGCAATTCACAAAGATGC	58.842	40.909	8	ACAGTAAGCTGGGAAGAGCC	60.151	55	181	63	(AC)^17	97	Dinucleotide
HN7TS9H03F6P8F	TCCTCTTGCCTTCTGAAATAAGC	59.507	43.478	27	GGGCCAGCTTATCTGCTTTG	60.01	55	229	93	(AC)^14	121	Dinucleotide
HN7TS9H03F6Q28	TCCAGTGCAATCACAGAAGG	58.569	50	12	GCTCATGACAACAGGTGAGC	59.942	55	454	246	(AC)^8	262	Dinucleotide
HN7TS9H03F78M7	ACTGTTGATGCCGGGAAATG	59.58	50	152	GCACCACAGCAGACCTTG	59.387	61.111	306	248	(AC)^13	274	Dinucleotide
HN7TS9H03F7EU2	CCAACCAGGCATAGTGCAG	59.262	57.895	180	GCCCTGCCAGTTTGAGTTC	59.786	57.895	352	214	(AC)^16	246	Dinucleotide
HN7TS9H03F86HR	GCCAAAGGGAAGGATTGGC	59.856	57.895	96	AGATGAAGAGTGGATTGCAGG	58.488	47.619	337	273	(AG)^15	303	Dinucleotide
HN7TS9H03F8A2J	TTATGACACTAATGATACCCTGAAC	57.205	36	6	CAGGCAGAGCCCTACACC	60.164	66.667	344	109	(AC)^10	129	Dinucleotide
HN7TS9H03F8FNA	GTCATGCAGGAGATGAATTACC	57.668	45.455	247	GTTCCACTCTTCTTGGTGAGG	58.986	52.381	424	373	(AG)^10	393	Dinucleotide
HN7TS9H03F8H9W	ACATAGTAATTAGTTGGTTGTACCC	57.373	36	21	GAGGTAAGTCTTGTGACTGGC	59.063	52.381	172	81	(CT)^10	101	Dinucleotide
HN7TS9H03F8MTN	TCAATGCCAACAGCCTTGC	60.083	52.632	160	ACATGAGGCTGCATTTGCTC	59.938	50	534	482	(AC)^10	502	Dinucleotide
HN7TS9H03F8W8V	GGGACAGAAGTGCATTTGG	57.242	52.632	64	GGCCTGATTGATCCTGCAC	59.336	57.895	372	94	(AC)^8	110	Dinucleotide
HN7TS9H03F8YF2	ACAGCATGGCTCTGCAATC	59.259	52.632	14	ACCCATTCCTGTGCTCACC	60.386	57.895	248	119	(AC)^14	147	Dinucleotide
HN7TS9H03F93S5	CAGCAGCCTAACAGAGGGC	61.202	63.158	306	CTCTGGGACAGTGGACCG	59.771	66.667	572	529	(GT)^8	545	Dinucleotide
HN7TS9H03F9AUB	GAGAGCTGGATGGTTTGCAC	59.94	55	34	TCAGGCATGTGCTACTGGG	60.157	57.895	460	399	(AC)^12	423	Dinucleotide
HN7TS9H03F9D5Q	AGAGGTCAAGCTACGCAGG	59.858	57.895	138	GGTGCCATCATTCCAGCTC	59.336	57.895	309	220	(CT)^12	244	Dinucleotide
HN7TS9H03F9LU6	ACCTGCCCTGAGACCTTTG	60.004	57.895	66	AAAGACAGAGCCTCAACCC	57.718	52.632	476	397	(AT)^8	413	Dinucleotide
HN7TS9H03FH0GT	GAGAGAGCGTTTCGACTGC	59.366	57.895	272	GCACCTGAAGACACCTTGG	59.113	57.895	678	309	(GT)^8	325	Dinucleotide
HN7TS9H03FHG6Y	AGCCAAGGTAGTGACAGGC	60.081	57.895	139	GAATCTCGCCTGGAAGGTTG	59.374	55	461	416	(AC)^8	432	Dinucleotide
HN7TS9H03FHNEN	TCAGGCTCTTGGGAACAGG	59.698	57.895	30	ATGTTGCAGCAGGGCATTC	59.857	52.632	351	284	(AC)^17	318	Dinucleotide
HN7TS9H03FHXA9	TGCTGCCAAGAAGCATTTCC	60.152	50	117	AGCTGATTGTCCTCCAAAGG	58.262	50	382	243	(AC)^10	263	Dinucleotide
HN7TS9H03FI0K1	ATGTGTCCAGGGCCAACTG	60.691	57.895	157	TCAAGAACATGGACTTTAGCTG	57.127	40.909	342	233	(AC)^8	249	Dinucleotide
HN7TS9H03FI1RX	TTTGCAAGGGCACGTTCTG	60.01	52.632	178	CCACATGCCACCACCTTTAG	59.58	55	417	279	(GT)^9	297	Dinucleotide
HN7TS9H03FIP8G	CTCCGGCTTACACAGTTGTC	59.311	55	0	TCTGAACAGGCCCAGGATG	59.774	57.895	240	51	(GT)^10	71	Dinucleotide
HN7TS9H03FISHT	TGGCTGTGTGCCAATGTTC	59.709	52.632	206	TGGAGCTGGAACCAGGATG	59.774	57.895	465	297	(AC)^8	313	Dinucleotide
HN7TS9H03FIVFP	CCTTTAGTCAGCAGGAAGCC	59.01	55	15	AGGCAACGTGCTTCGATAC	58.983	52.632	416	71	(AC)^10	91	Dinucleotide
HN7TS9H03FJ0U2	CACCATTTGACAGGCAGGG	59.482	57.895	11	AGAACTTTGTAAGAACTCAGAGGC	59.47	41.667	284	219	(AG)^14	247	Dinucleotide
HN7TS9H03FJFV8	GCAGGGCAACAACCAATTC	58.525	52.632	57	GACGAAAGCACAAGCTCCC	59.865	57.895	212	118	(AC)^9	136	Dinucleotide
HN7TS9H03FJOI7	GCTCCCTCCTGCTGATTGG	60.911	63.158	139	CTGCACTCAAAGCCTCAGC	59.864	57.895	554	438	(AG)^9	456	Dinucleotide
HN7TS9H03FK0LG	CCTGGAGGTCCCTTCCAAC	60.081	63.158	60	GAGTGTTGTACTCCGGCTTC	59.03	55	227	122	(GT)^8	138	Dinucleotide
HN7TS9H03FKDET	TTGTACACGCAAGCTGAGG	58.826	52.632	21	TCTGGTACTTGGAGGTTGCTC	60.146	52.381	220	141	(CT)^9	159	Dinucleotide
HN7TS9H03FKG48	TCCGGGAAGTAGGAAGTCG	58.876	57.895	234	CAGCTGTGGTTGAAATGCC	58.236	52.632	515	339	(AC)^11	361	Dinucleotide
HN7TS9H03FKKOS	ACAGCTGCCCTGTAACTTG	58.423	52.632	255	CCAAGAAATGGACCCAGCC	59.174	57.895	463	301	(CT)^8	317	Dinucleotide
HN7TS9H03FKXIU	CTATGACTCCTCCCAGGTGC	60.007	60	83	ACCGTTCAGACATTGTTGGC	59.798	50	404	166	(AG)^8	182	Dinucleotide
HN7TS9H03FKZTR	GCCATTGATAGACCTGCCC	58.726	57.895	284	GTGGGCCTAGGACGGTTAG	59.932	63.158	452	404	(AT)^8	420	Dinucleotide
HN7TS9H03FL405	GCTACCGCTTTAGCCAAGTG	60.013	55	477	CGACTTACGTGCAGCGTTC	60.301	57.895	656	597	(CT)^8	613	Dinucleotide
HN7TS9H03FL7TW	CCATGCAGAAACTCACCTGC	60.223	55	113	GACCTATAGCGTGCTTTGGC	59.803	55	352	243	(GT)^8	259	Dinucleotide
HN7TS9H03FLAUV	GTTGGGCTTGTCCATCAGC	59.86	57.895	348	GTGACCTGCCCATGAATGC	59.934	57.895	503	395	(CT)^8	411	Dinucleotide
HN7TS9H03FLCRX	CAGATGATCAACCATACGAGTTCC	60.015	45.833	66	CCCAAACTGGCTGACGTTC	59.79	57.895	443	303	(AC)^8	319	Dinucleotide
HN7TS9H03FLIXV	AACACAGGCATCAGCGGG	61.109	61.111	102	GTGTGTAGCCATGTAGGAGC	58.806	55	340	252	(AC)^10	272	Dinucleotide
HN7TS9H03FLR3B	CTGTATCCAGCTATGCCTGTC	58.718	52.381	15	CACTTTCCCGAACCAGATGC	59.941	55	254	63	(GT)^8	79	Dinucleotide
HN7TS9H03FLTU0	CCTGGAGGTCCCTTCCAAC	60.081	63.158	59	AGAGTGTTTGTACTCCGGC	57.837	52.632	228	121	(GT)^8	137	Dinucleotide
HN7TS9H03FM79P	TTGGCTAACCCATTGCCAC	59.095	52.632	88	GCCACCTTTCCAATGCAGG	60.158	57.895	406	161	(GT)^11	183	Dinucleotide
HN7TS9H03FMAGK	GTGGCTTGGCATTAAGTTCAC	58.801	47.619	3	GGAACTTTGGTAGCCTCGAC	59.022	55	265	169	(AG)^9	187	Dinucleotide
HN7TS9H03FMKK1	AGATCCATGAAATGAAGGAGGC	58.945	45.455	51	AGGTGTTCCATTGTTTCACCAG	59.812	45.455	349	211	(AG)^9	229	Dinucleotide
HN7TS9H03FNGOS	AGCCTCGTTTGCAGAAGTC	58.822	52.632	235	CTATGCTGGGATTGACGGC	59.12	57.895	582	290	(AC)^9	308	Dinucleotide
HN7TS9H03FOBNG	ATCCCATAGTGGGCAGTCG	59.625	57.895	146	TCCCTTGTCCACACCTAGTC	59.13	55	407	345	(CT)^8	361	Dinucleotide
HN7TS9H03FOPHW	TCAGCCTTACAAATAATACCTTCC	57.265	37.5	44	GCCATTTACCAATCCTGCCC	60.008	55	310	92	(AG)^8	108	Dinucleotide
HN7TS9H03FOSJK	ACCTTCAAAGGCTAGGAACATAAC	59.524	41.667	1	TGGAAGTCAGGGCCATCAG	59.774	57.895	367	48	(GT)^13	74	Dinucleotide
HN7TS9H03FPEER	ATGGCCACACATTTGGCTG	59.78	52.632	331	TGACTTCCTGCAACGGACG	61.042	57.895	504	424	(AG)^11	446	Dinucleotide
HN7TS9H03FPKME	TATGCTTATGGCAGGTCCC	57.319	52.632	337	TGAGAGGCTGGCCCAATTC	60.462	57.895	525	416	(AC)^12	440	Dinucleotide
HN7TS9H03FPMPC	GGGTGATGAAGAACCAAGCC	59.579	55	161	TGAACCACTAAACAATACTCCCTG	59.221	41.667	436	299	(AC)^10	319	Dinucleotide
HN7TS9H03FPQ9F	AGCTTACATTCAGCTGGAAAC	57.275	42.857	288	GGTGCCCAAGCAATAGGTG	59.558	57.895	479	429	(AT)^9	447	Dinucleotide
HN7TS9H03FPQQ4	AGGAACTGAAGACGGCCTG	60.082	57.895	112	AGTGATCTACACCCTTAAGAGCC	60.073	47.826	381	262	(GT)^9	280	Dinucleotide
HN7TS9H03FPRBR	GCAGTGGAGCCAAGTCATC	59.267	57.895	17	AGGCAGAGCTTCTTTGTTGG	59.145	50	193	142	(CT)^9	160	Dinucleotide
HN7TS9H03FPX20	AGAGGTTTGCAGTTCCTCAC	58.496	50	121	CTGTGTAGATCCCAGAATGCAC	59.558	50	400	161	(AC)^16	193	Dinucleotide
HN7TS9H03FPXPJ	TGTGCCAACATTGCTTCCG	60.084	52.632	144	GCTCAGGTGCGTACAATCG	59.725	57.895	504	452	(AC)^9	470	Dinucleotide
HN7TS9H03FQ1KU	CAGTGTTGCCGTACAGGTG	59.499	57.895	218	GCCTTTCTGAGACTGACTTGG	59.333	52.381	579	428	(GT)^10	448	Dinucleotide
HN7TS9H03FQ5Y2	GCCTTTGTTTACAGTGAGCATC	58.923	45.455	105	GGAGGGCATGTGGCTTATC	58.726	57.895	289	176	(AC)^11	198	Dinucleotide
HN7TS9H03FR6QI	GGCAGGTTGAAGAGCTGAC	59.193	57.895	139	GCTGCCGACTTACATGCAG	60.013	57.895	316	260	(CT)^10	280	Dinucleotide
HN7TS9H03FR9VD	AGCCTCGTTTGCAGAAGTC	58.822	52.632	112	GGACTATGCTGGGATTGCG	59.12	57.895	461	167	(AC)^9	185	Dinucleotide
HN7TS9H03FRAXL	TGTGACTCTGCAGTTTGCATC	59.877	47.619	396	TTGGCCTTTAACGTACATCAG	57.016	42.857	568	505	(AC)^8	521	Dinucleotide
HN7TS9H03FRK31	TCCGGGAAGTAGGAAGTCG	58.876	57.895	234	CAGCTGTGGTTGAAATGCC	58.236	52.632	512	338	(AC)^11	360	Dinucleotide
HN7TS9H03FRVM3	TCTGTGTCATGCTCAGGC	57.717	55.556	147	CAAGTAAAGAGGGCACGGC	59.568	57.895	492	210	(AC)^9	228	Dinucleotide
HN7TS9H03FS38E	CAAGAAGTCCCAGGCTTGC	59.486	57.895	53	GCTTCATCAAAGACACTTCATCTG	59.128	41.667	361	302	(AT)^10	322	Dinucleotide
HN7TS9H03FS8EY	CTCTGCTCAGGTAGGGCTG	59.932	63.158	124	TGTCTGTGTCACGCTCAGG	60.38	57.895	392	300	(GT)^9	318	Dinucleotide
HN7TS9H03FSJ6A	AGCAGTTCAGCACATCTTTCC	59.601	47.619	5	TCATCTCCAGCGGTCCTTG	59.856	57.895	359	71	(AC)^9	89	Dinucleotide
HN7TS9H03FT7BF	TGTGAATCTTTGCTGAGAAGCC	59.946	45.455	79	TCATTCTACCATGGGATGTTCAC	58.995	43.478	515	365	(AG)^8	381	Dinucleotide
HN7TS9H03FTCUF	AGTTTCCCGTTAGTGCATGG	58.934	50	30	CTGTGAGTTGTGGAAGCCC	59.113	57.895	463	67	(AG)^8	83	Dinucleotide
HN7TS9H03FTLIQ	GCCGACGAGTGCTTATTGG	59.722	57.895	30	TAGCGAGGGAACAGCATCC	59.932	57.895	189	115	(GT)^8	131	Dinucleotide
HN7TS9H03FTWAU	TTTGCCCAATGAGTGCAGG	59.402	52.632	179	TTATCAGCTCTGGTCACTGG	57.402	50	429	333	(AT)^8	349	Dinucleotide
HN7TS9H03FTWDI	CCTGACAAATGGCACAATTAGC	59.239	45.455	106	CCTGACATGGTCCCAAAGAC	58.931	55	303	146	(AT)^9	164	Dinucleotide
HN7TS9H03FUA8O	ATGCATTGTGGTCAAGGGC	59.477	52.632	35	CGTTGTGGAAGTCGAACGC	60.515	57.895	482	406	(GT)^9	424	Dinucleotide
HN7TS9H03FUDIG	CCGGGACAAGCTACAGGG	60.164	66.667	10	CAGCTTGGGAAGTTCTGGC	59.486	57.895	326	64	(GT)^8	80	Dinucleotide
HN7TS9H03FUG1E	TGCTCTTTCTTAGGTCTGTTAGC	58.945	43.478	22	TGGTCCCAGAAGTTCCACG	60.006	57.895	341	166	(AC)^11	188	Dinucleotide
HN7TS9H03FUHFI	TTGTGGCCTGGTCCAACTG	60.916	57.895	44	ATGGTCCCTTCTGCACTGG	60.08	57.895	336	91	(GT)^14	119	Dinucleotide
HN7TS9H03FUHPK	AGCCTAAACACGGTCAGGG	60.082	57.895	185	CTTGGGCTGCTGGTTGAAG	59.785	57.895	626	396	(AT)^8	412	Dinucleotide
HN7TS9H03FUMRE	GCAGTTGCTGTGGGTTAGG	59.488	57.895	65	TGGCTGAGGGAACAGCATC	60.46	57.895	288	140	(AC)^9	158	Dinucleotide
HN7TS9H03FUNKG	CCCGGGTGTCAAAGCGG	61.48	70.588	71	ACTCCATGCAGAAGAGTCC	57.191	52.632	245	115	(AT)^12	139	Dinucleotide
HN7TS9H03FUZCB	GTACTTTGGGCCTGCTTGG	59.483	57.895	106	TGAGGGATGCCTGTAAGCTG	60.224	55	422	361	(CT)^8	377	Dinucleotide
HN7TS9H03FV1IH	TGCTGCCAAGAAGCATTTCC	60.152	50	117	AGCTGATTGTCCTCCAAAGG	58.262	50	378	243	(AC)^10	263	Dinucleotide
HN7TS9H03FVCO9	CACATGCCTGGCTTTGGTC	60.158	57.895	47	ACAATCTTTGTAAGTTCTGCAAGC	59.239	37.5	420	303	(AC)^8	319	Dinucleotide
HN7TS9H03FVJA4	TTCCCAGGCTAGCTTCAAC	57.8	52.632	148	TGAGCATGTGTGCCTGAAC	59.114	52.632	330	271	(AC)^10	291	Dinucleotide
HN7TS9H03FVMFE	TGGACAAACTTCAGGAGGC	58.031	52.632	215	TTGTGGACCAGGAAAGTGG	57.942	52.632	490	386	(AC)^9	404	Dinucleotide
HN7TS9H03FVNIC	GCAAAGTGTGGATGCACTTG	58.964	50	9	TGAATCACTGCCTCAGATCC	57.764	50	383	257	(GT)^10	277	Dinucleotide
HN7TS9H03FVVNX	GCATATCTTCTGGCCAACCC	59.435	55	67	CAGAAGCTGGGAAACAGCC	59.486	57.895	358	166	(AC)^8	182	Dinucleotide
HN7TS9H03FW70E	CGCCCTTCTCTGAACTTGC	59.57	57.895	161	AGATGGTGCAGTCAGACCC	59.777	57.895	463	276	(GT)^11	298	Dinucleotide
HN7TS9H03FW8AF	TGGATCCTACCATGCAGGC	59.928	57.895	259	AGCACGGGCATGTTTATTCAG	60.011	47.619	606	390	(AT)^10	410	Dinucleotide
HN7TS9H03FWEHO	ACCACTGAGTAGAGTTGGC	57.124	52.632	30	AGTGAGGAGTTTCCCATGC	57.794	52.632	298	187	(CT)^8	203	Dinucleotide
HN7TS9H03FX1YP	GGTATGGGACCGTAGCAAAG	58.801	55	3	TGTCTGCATTCTGCACAACC	59.797	50	194	121	(AC)^15	151	Dinucleotide
HN7TS9H03FX2WI	ACACACATTTGTCTCCAAGC	57.298	45	16	ATTAATTCTATCCTGCCCATGC	57.083	40.909	434	75	(CT)^10	95	Dinucleotide
HN7TS9H03FX54N	GTATGTGTGCCGCTTCTCG	59.725	57.895	189	CCTCCACACTCTTCGCAGG	60.825	63.158	375	256	(AC)^9	274	Dinucleotide
HN7TS9H03FXADC	GGCAAAGGGACATGACTGC	59.86	57.895	187	ATCGGCTGAGATGAAGGGC	60.308	57.895	442	293	(AC)^9	311	Dinucleotide
HN7TS9H03FXDXC	TCTCCAGTTCCCTTACCGC	59.475	57.895	242	ACTTTCATTTGCACCAAACAGG	58.966	40.909	659	511	(GT)^8	527	Dinucleotide
HN7TS9H03FXESJ	GAGATAAGCAACTGGTGGAAGG	59.489	50	20	CCAGCCCAAATAGCATGGC	60.008	57.895	242	77	(AC)^8	93	Dinucleotide
HN7TS9H03FXIK6	AGCAAGGCAGGAAACATTAAG	57.535	42.857	51	GAAAGGCTGCTGCCAAATTC	59.025	50	295	197	(GT)^11	219	Dinucleotide
HN7TS9H03FXRIN	CCACGCTAAGCACATTCCC	59.641	57.895	104	TAGACCAGCCTGCCCTCTG	61.458	63.158	311	138	(AC)^13	164	Dinucleotide
HN7TS9H03FXU0N	GCAAGAGGGATCCAAACAGC	59.939	55	17	TCAGGCCAAATGTACACCG	58.507	52.632	184	63	(AG)^8	79	Dinucleotide
HN7TS9H03FYCTE	ACTGTTGCCTACAATCTCGAC	58.792	47.619	342	CTGTGTGCCAGGGAGGC	60.753	70.588	618	469	(AC)^13	495	Dinucleotide
HN7TS9H03FYFYB	TGGCAATTTCTGATGGGCG	59.559	52.632	43	TCTGCAGTGGAGCCAAGTC	60.383	57.895	438	291	(AG)^9	309	Dinucleotide
HN7TS9H03FYHAY	TCACGAACAACAGGGAAGG	58.052	52.632	91	CCAGTTTGGAGCAGATTGCC	60.223	55	265	144	(AC)^8	160	Dinucleotide
HN7TS9H03FYS7W	TTAGAGGAAACCGGCAGGG	59.776	57.895	100	AGCTGGTTCCTGTTTGAACG	59.442	50	360	151	(GT)^8	167	Dinucleotide
HN7TS9H03FYSLR	ACCACCTCCATGATGTCTCC	59.566	55	197	AGAGTGCAGCATTTCCGTG	59.194	52.632	454	235	(AC)^8	251	Dinucleotide
HN7TS9H03FZ9JG	GGGCCTGCCAAATTCTATGC	60.366	55	89	TGGGAGGAGGTGTTCCTTTAG	59.514	52.381	362	305	(CT)^9	323	Dinucleotide
HN7TS9H03FZE4X	ACAACTAAAGGGAAAGGAGGC	58.616	47.619	117	AGGCCTCAGACTGGTAGGG	60.776	63.158	356	235	(AC)^12	259	Dinucleotide
HN7TS9H03FZHWD	ATGAGGTGCAGGAGCCTTG	60.461	57.895	221	GCCTTTCTTGGTCACTGCG	60.158	57.895	378	280	(AC)^9	298	Dinucleotide
HN7TS9H03FZLYH	CCTATCAGGCGGGCGTAAG	60.749	63.158	54	TAATTCCTCGGGCGGTGTC	60.232	57.895	278	182	(AT)^9	200	Dinucleotide
HN7TS9H03G0BZH	AAGCTTTGTCTGGGTTGCC	59.326	52.632	46	GGCGCAGACACTCTTAACC	59.277	57.895	352	289	(AT)^9	307	Dinucleotide
HN7TS9H03G0DXQ	CTGTGAGAACCCAATGCCC	59.18	57.895	64	AGCAATAGCTCAGTAACATTGAAG	58.091	37.5	411	332	(AC)^10	352	Dinucleotide
HN7TS9H03G0JSI	TTGCATGCGCTGGGTTTAC	60.158	52.632	158	TGTGATCGCTACCGACCTG	59.936	57.895	535	379	(CT)^8	395	Dinucleotide
HN7TS9H03G0KL0	AGAGTCCTCTGGGTATTGGAG	58.741	52.381	52	CTGCCATTCGCACTGTTCC	60.231	57.895	455	93	(AC)^8	109	Dinucleotide
HN7TS9H03G0N4D	GATCCAGGAACTGCCCAAC	58.878	57.895	4	GGGCCCTTGAATGCAACTC	59.858	57.895	352	44	(AC)^19	82	Dinucleotide
HN7TS9H03G0PNO	CACAAGCACCCAAGAGATTAGG	59.75	50	36	GCTCTGGAGAAGAGAAATTTACCATAC	60.551	40.741	386	78	(AC)^9	96	Dinucleotide
HN7TS9H03G0TZF	CCTGCCCAAGTTTCTGCAC	60.083	57.895	151	GGCCCTAATAGCCCGTCTG	60.383	63.158	583	471	(CT)^8	487	Dinucleotide
HN7TS9H03G0WB3	AGTGATGGGCTGGGAGTTC	59.774	57.895	216	AGCTCAAGGCAGTTTACAAGC	59.875	47.619	542	430	(AT)^9	448	Dinucleotide
HN7TS9H03G17UP	CCGTACAGTTGCAGCCATC	59.645	57.895	50	TCACCTGAAACACTGCAATCC	59.531	47.619	497	296	(AC)^9	314	Dinucleotide
HN7TS9H03G1C9C	CCATGCAGAAACTCACCTGC	60.223	55	113	GACCTATAGCGTGCTTTGGC	59.803	55	352	243	(GT)^8	259	Dinucleotide
HN7TS9H03G1LCC	TTCACAGCGCACATTGGTC	59.79	52.632	182	TCATGCTGGTAGTGACGCC	60.53	57.895	427	294	(AT)^8	310	Dinucleotide
HN7TS9H03G1NG7	AGAGCATCCGCTGTACTAAGG	60.078	52.381	122	TGAGAAACTGTCTGAAAGGAAGAC	59.41	41.667	347	171	(AC)^10	191	Dinucleotide
HN7TS9H03G1Q3D	TGAGTCTCCAGAGATGTGCC	59.574	55	6	TGCTGTCACTAGGCTTCCAG	60.152	55	323	177	(AC)^9	195	Dinucleotide
HN7TS9H03G1R4W	CCGTATGGAATGCAGGAACC	59.442	55	172	AGAGCTCAAAGCGATTGCG	59.647	52.632	414	208	(GT)^8	224	Dinucleotide
HN7TS9H03G1TRP	CCGTTCCATTGTATTCTCCACC	59.817	50	42	ATACCAGCAGTCCCTTCAC	57.179	52.632	316	170	(AG)^8	186	Dinucleotide
HN7TS9H03G26XA	ACCATTAAGTGCCCACAGC	58.795	52.632	82	GGACCAGAATAATGCCTTTCCC	59.812	50	473	394	(CT)^10	414	Dinucleotide
HN7TS9H03G2FVS	GAGTGCCCGAAGAGTAACG	58.698	57.895	32	GCAGATATACTGGAGGCCAAC	58.986	52.381	424	302	(AT)^12	326	Dinucleotide
HN7TS9H03G2KRS	TTCCTCACTCGTTCAGCCC	60.082	57.895	36	CCACTTCCTCTTTGCCTGAC	59.225	55	343	216	(AC)^16	248	Dinucleotide
HN7TS9H03G3F8S	TCACAACCTGAGTGTCAAAGC	59.467	47.619	318	TGCATGCTAGTGCAGACCC	60.833	57.895	581	430	(AC)^14	458	Dinucleotide
HN7TS9H03G3H9L	CCACCATCCTGCCATAAGC	59.028	57.895	176	CTTCACAGCTACAATCTGGAC	57.104	47.619	459	363	(GT)^12	387	Dinucleotide
HN7TS9H03G3PRX	TTCCTCACTCGTTCAGCCC	60.082	57.895	36	CCACTTCCTCTTTGCCTGAC	59.225	55	343	216	(AC)^16	248	Dinucleotide
HN7TS9H03G3QFQ	GTTGAAACATGAAACCTGCCC	58.997	47.619	150	GTTGGTTCAGTTTGGCACTTC	58.937	47.619	321	219	(AC)^8	235	Dinucleotide
HN7TS9H03G3UOR	TGTTGGGTCTTTGTGCAATAGG	59.879	45.455	153	TCCAATGCAGGTTTACTTGTC	57.198	42.857	543	369	(GT)^8	385	Dinucleotide
HN7TS9H03G454T	TCTTCAGAGATTGCTGTCCC	57.693	50	113	CACTGGGTACCTCGAGCAG	60.232	63.158	447	199	(GT)^13	225	Dinucleotide
HN7TS9H03G465R	TTTCTGGGCTCGCGGATG	60.867	61.111	238	GGAGATGCGAGGAATTGAACC	59.809	52.381	644	421	(AC)^9	439	Dinucleotide
HN7TS9H03G4ZKQ	TGTGATGCATAGCACAGGTC	58.724	50	192	TGAGCCTTACAGTCTGCTTG	58.291	50	452	357	(AC)^11	379	Dinucleotide
HN7TS9H03G52U4	ACATAGTAATTAGTTGGTTGTACCC	57.373	36	21	GAGGGTAATCTTGTGACTGGC	59.124	52.381	172	81	(CT)^10	101	Dinucleotide
HN7TS9H03G5ACL	AGCTACCAGGATTTAGGCAG	57.454	50	26	TACCCTCTAGTCAGGTGCG	58.569	57.895	466	139	(AC)^11	161	Dinucleotide
HN7TS9H03G5LS9	TGTGCCAACATTGCTTCCG	60.084	52.632	144	GCTCAGGTGCGTACAATCG	59.725	57.895	506	454	(AC)^9	472	Dinucleotide
HN7TS9H03G5TAQ	CACCTTGTCTTAGCAGCCC	58.887	57.895	98	CAGATCTCTGTAGAGTGAATGGAC	58.935	45.833	462	267	(AG)^13	293	Dinucleotide
HN7TS9H03G5VK8	GAGCCAATCTTGGGATCTTCTG	59.552	50	26	GCATGAGTTGTGGGTCACG	59.865	57.895	369	79	(CT)^8	95	Dinucleotide
HN7TS9H03G618A	CACTGTCCAACACAAGGGAC	59.442	55	269	GCCTGCAGCATACGTTGG	59.934	61.111	551	442	(AC)^10	462	Dinucleotide
HN7TS9H03G63G9	GTGGCCCTTTCTGCACTTG	60.083	57.895	144	ATGCCACCTGCTGTCCC	60.001	64.706	432	338	(AC)^9	356	Dinucleotide
HN7TS9H03G6LPG	ACTGTGAGACCTCATGCTG	57.517	52.632	13	ATGCTCTGGGACTTTGCAC	58.801	52.632	213	95	(GT)^8	111	Dinucleotide
HN7TS9H03G6LYC	AGGTTACCCTGACAGCTCC	59.082	57.895	153	GCAGTAAGTGGCTCGTTGC	60.231	57.895	349	197	(AC)^14	225	Dinucleotide
HN7TS9H03G6MUJ	CAACGCCTTGTATCCTGGC	59.641	57.895	127	AGAACTGCACACCAAGAGG	58.04	52.632	294	233	(AC)^11	255	Dinucleotide
HN7TS9H03G6TB5	AGGGAACACTGGTAGGTTAGAC	59.608	50	61	ACACAGGCCTTGCATGTTC	59.407	52.632	409	126	(AC)^9	144	Dinucleotide
HN7TS9H03G735M	TGTGGGTGAGCACAAGAGG	60.309	57.895	85	TGTGCGCCAATTTGTAGGC	60.158	52.632	269	120	(AC)^8	136	Dinucleotide
HN7TS9H03G75IP	AGCACTCGAAGGATGGGTC	59.856	57.895	274	GGGTCAGACTGGATGAGTTC	58.073	55	647	534	(AC)^8	550	Dinucleotide
HN7TS9H03G7KNJ	GTGCCTGGTGTCAAAGAGG	59.113	57.895	86	GCCGTATGCAGTCAACCAC	59.939	57.895	453	354	(AC)^12	378	Dinucleotide
HN7TS9H03G7WJ2	TGCACCATCCTGGCTATTC	57.951	52.632	17	CGCCCTATACCCGAAGGTC	60.083	63.158	420	56	(AC)^11	78	Dinucleotide
HN7TS9H03G7X94	CATTGCTGCCAGATGGAGG	59.334	57.895	35	CACTCTGCCAAATACCAGGC	59.654	55	418	318	(AT)^9	336	Dinucleotide
HN7TS9H03G81RP	GGCAGCTGATGAAATGGGAC	60.01	55	91	AGGCACTGATACCACGCTG	60.531	57.895	246	153	(AC)^9	171	Dinucleotide
HN7TS9H03G84CM	GGAAAGTCCTGCAAAGCGG	60.158	57.895	187	GGCAATCCAAAGACTCGCC	59.937	57.895	404	308	(GT)^10	328	Dinucleotide
HN7TS9H03G8HGF	CCTCCATATTCAGTTGCCCTC	58.908	52.381	86	ACTGCACAGGATACAGGTG	57.506	52.632	297	188	(AC)^13	214	Dinucleotide
HN7TS9H03G8SSN	GGGCTTGTCTAAAGTTGGGC	59.866	55	433	TGATGGCAAAGAACGATGGG	59.293	50	627	524	(AC)^8	540	Dinucleotide
HN7TS9H03G9KTA	GTGAGAACCCAATGCCCATAC	59.737	52.381	66	TGCTTCCCGCATTGCTATC	59.039	52.632	508	332	(AC)^10	352	Dinucleotide
HN7TS9H03G9P47	ACCTCTTCACAGCCTTCCC	59.697	57.895	61	TGTCGAAGGTCCTGACTCG	59.489	57.895	459	100	(GT)^11	122	Dinucleotide
HN7TS9H03GAAVT	CTCCATCTGGGAGACGTGG	59.933	63.158	114	CCCAGTCTACGCTCCATCC	60.008	63.158	336	169	(GT)^11	191	Dinucleotide
HN7TS9H03GAEG6	GGCCAATTCCCAGTTAGCATAG	59.879	50	67	AGCTCATACGGGCAAGGAG	59.931	57.895	504	101	(AC)^12	125	Dinucleotide
HN7TS9H03GAWNE	GCAACGCTGTCATCAAGCC	60.883	57.895	22	TGTGGAGCTGCCCTCTG	59.242	64.706	273	68	(AC)^11	90	Dinucleotide
HN7TS9H03GB2SR	GCCATTTCTGTGGTCAGCC	59.86	57.895	145	GTCAGTGCCATCTCTGAAGC	59.377	55	338	180	(CT)^12	204	Dinucleotide
HN7TS9H03GBAIH	AGTGTCACCCAGGAAAGGC	60.31	57.895	165	GTGGTTGCGAACTTGCCC	60.395	61.111	490	195	(AC)^10	215	Dinucleotide
HN7TS9H03GBBOI	ACTAGCCCTGGATTACACCG	59.645	55	221	TGTATGTCCAAAGGTTTCTTCAC	57.746	39.13	531	316	(GT)^14	344	Dinucleotide
HN7TS9H03GBOVH	AGAACCTCCAAGGACCAGC	59.697	57.895	154	ATGAGAAAGCCACACCTGC	58.801	52.632	529	416	(AG)^8	432	Dinucleotide
HN7TS9H03GC31Z	GCCATTTCTGTGGTCAGCC	59.86	57.895	145	GTCAGTGCCATCTCTGAAGC	59.377	55	332	180	(CT)^13	206	Dinucleotide
HN7TS9H03GC3TZ	AAACCCTGCCAATTAGCTTAC	57.246	42.857	21	TCGGTCCACTTCGCAAGAC	60.748	57.895	314	92	(AT)^9	110	Dinucleotide
HN7TS9H03GC80S	GCCAAAGGGCGGAAGAAAC	60.454	57.895	48	CCTTGGTCCCTCTGGGATG	59.85	63.158	337	105	(AC)^15	135	Dinucleotide
HN7TS9H03GCEGC	CCTAGCATTCACTGGCAACAG	60.012	52.381	79	GGTCCCTCCCACAGATTCG	60.233	63.158	464	196	(AC)^9	214	Dinucleotide
HN7TS9H03GCOU0	TCTCCTGGTCTTGCTTGGG	59.698	57.895	139	GATCTGCCCTGGGACCTTC	60.233	63.158	288	184	(CT)^8	200	Dinucleotide
HN7TS9H03GCUBX	AAACCTCCAGCCCTTACCC	59.692	57.895	300	ACCTGGGAGCGATGTTCAG	60.157	57.895	477	393	(CT)^8	409	Dinucleotide
HN7TS9H03GCWTC	ATGATGGCACAAGTAACCATAC	57.245	40.909	197	AAATCCAGTTCAGCAGGGC	58.791	52.632	476	350	(AC)^9	368	Dinucleotide
HN7TS9H03GCZZ9	TCTGTGCCTTAGCAGAGCC	60.157	57.895	290	TGATTGTAACTTGTCCAGAGACC	58.876	43.478	635	370	(GT)^9	388	Dinucleotide
HN7TS9H03GD0TE	AGTATGGTCCTAAGGTGCTTTAAC	59.036	41.667	29	CATTTGTGCTCATAACAGGACG	58.737	45.455	181	77	(AT)^8	93	Dinucleotide
HN7TS9H03GD1B1	TGGGCTATAAAGGTTACCAAGG	58.266	45.455	123	TTGTATGGTTAAAGACTGATTCCC	57.451	37.5	519	432	(AC)^14	460	Dinucleotide
HN7TS9H03GDBAE	CTGCCCAAACGAGAACAGG	59.493	57.895	253	GTGGTTGCGGGAGATTCTTG	59.941	55	488	426	(AG)^8	442	Dinucleotide
HN7TS9H03GDEGY	CCTGACAAATGGCACAATTAGC	59.239	45.455	106	TTGGCTAGATGGGCTGTGG	60.157	57.895	491	146	(AT)^9	164	Dinucleotide
HN7TS9H03GDLYU	GGTCTATTCAGTATGTAACACAATTCG	59.224	37.037	40	CTTTGCTCAGGGCCCAAAC	60.083	57.895	278	80	(AC)^11	102	Dinucleotide
HN7TS9H03GDP6Y	TGATGGGCAGGAGAATGCC	60.539	57.895	34	ACCCAGTTCCATCACAAGC	58.411	52.632	268	176	(GT)^12	200	Dinucleotide
HN7TS9H03GE48C	CCTTCTCAGGTCCAGACGG	59.858	63.158	8	TCAGTCAGGAACCCTTGGC	60.004	57.895	313	250	(GT)^8	266	Dinucleotide
HN7TS9H03GE8DI	CTTGGGTCATGGAGTTGCAG	59.582	55	26	ATTCCGGAGCACTGGTAGG	59.549	57.895	381	96	(AG)^8	112	Dinucleotide
HN7TS9H03GEIWH	GGGACAACAGGTAAGCACAG	59.227	55	127	GTGCCAAGTCTAGTATGGTGC	59.471	52.381	421	186	(AT)^9	204	Dinucleotide
HN7TS9H03GESKI	TGCTTCAGAACTGGAATGCTTG	60.207	45.455	19	GGTTCAGCACTCTTGTGGC	59.788	57.895	320	104	(AC)^13	130	Dinucleotide
HN7TS9H03GEVPY	GCTGGGCTTGTTTGCTCC	60.086	61.111	112	TGGGCATGGCCTGTTAGTC	60.462	57.895	500	374	(AT)^8	390	Dinucleotide
HN7TS9H03GEXNS	GTAAGTAGTGTGCAGGTGCC	59.306	55	48	TGTCCTGTGCTTAGTGAAGTC	58.371	47.619	264	189	(AT)^8	205	Dinucleotide
HN7TS9H03GF49R	GATTGGCTACGGCCAAAGG	59.638	57.895	165	GACAGGCAGGAGGGAACTC	60.157	63.158	433	231	(AG)^8	247	Dinucleotide
HN7TS9H03GG6XK	TTTGAACCTGCCACCCTTC	58.635	52.632	95	GCAGAGCAGGACAATTTGGG	60.223	55	361	124	(GT)^8	140	Dinucleotide
HN7TS9H03GG973	CGTGGGCTTTCTTACCTCC	58.591	57.895	98	CCGCCTTCTGATTCTTGGG	58.962	57.895	310	243	(AC)^11	265	Dinucleotide
HN7TS9H03GGCEJ	GGTCCAAGTCACAAAGGGC	59.409	57.895	110	AGGACTCAATACAGACCAGTCG	60.011	50	447	338	(GT)^17	372	Dinucleotide
HN7TS9H03GGFFW	GGCACCAATTCCAGTGTAGC	59.939	55	302	CCAATCGCCAATGAGCCAG	60.01	57.895	492	366	(AC)^8	382	Dinucleotide
HN7TS9H03GGH4A	GGCCTTGCCTGAGGATCAC	61.209	63.158	8	CAGCAATTTCCCTGCGGTC	60.232	57.895	334	177	(AG)^8	193	Dinucleotide
HN7TS9H03GGN8U	ACTGTGAGACCTCATGCTG	57.517	52.632	13	ATGCTCTGGGACTTTGCAC	58.801	52.632	214	95	(GT)^8	111	Dinucleotide
HN7TS9H03GGWF9	TGCTGCACTTTGGATGTAATG	57.9	42.857	289	TGCCAACTTCTCATTTGCCC	59.792	50	517	464	(AC)^8	480	Dinucleotide
HN7TS9H03GH5UY	TCACAACCTGAGTGTCAAAGC	59.467	47.619	318	CTAGTGCAGACCCTGGGAG	59.552	63.158	573	430	(AC)^14	458	Dinucleotide
HN7TS9H03GHDL4	ACAATTCTTCTCTGTAGGTAGCG	58.763	43.478	254	CTCTCGTGCAACCTTGACATC	60.014	52.381	620	353	(AC)^10	373	Dinucleotide
HN7TS9H03GHRHI	AGTGATGGGCTGGGAGTTC	59.774	57.895	216	ACTTCTGACCAGAGTGCCC	59.701	57.895	652	431	(AT)^9	449	Dinucleotide
HN7TS9H03GI13X	GCCCACACTTGGCACATTC	60.454	57.895	81	CAGCCCAAAGAGGCAACAG	59.785	57.895	296	181	(AC)^14	209	Dinucleotide
HN7TS9H03GIJX4	CGAAGCCTGAAGACACTGG	58.904	57.895	182	GGTGACCTTACACCAAGCTG	59.227	55	536	366	(AT)^8	382	Dinucleotide
HN7TS9H03GIJZ5	CATCTGGTGACGAATGACGC	60.084	55	177	GCTCATAACAAAGGACACATGTAAG	59.216	40	443	378	(AC)^12	402	Dinucleotide
HN7TS9H03GIONR	GGCCATCATTCTACAGTGGC	59.44	55	478	GAGGGAACGCGTACGGAG	60.622	66.667	654	574	(GT)^14	602	Dinucleotide
HN7TS9H03GJ0Q2	GCTCCAGAGGCTAGAAGGC	60.308	63.158	10	GGGAGGGAGCTGACTATGC	60.006	63.158	264	80	(AC)^8	96	Dinucleotide
HN7TS9H03GJ3NI	ACCTCTTCACAGCCTTCCC	59.697	57.895	61	TGTCGAAGGTCCTGACTCG	59.489	57.895	459	100	(GT)^11	122	Dinucleotide
HN7TS9H03GJNPX	GCCTGGTTCACTGTTCAGC	59.788	57.895	30	GGATGGAGAGTCCTGAGCG	60.009	63.158	234	175	(AC)^13	201	Dinucleotide
HN7TS9H03GKGRN	AGAGTGATCAAAGAAGTTTGGAGC	60.013	41.667	258	TGGTGTGATCCAGTAGGGC	59.469	57.895	558	345	(AC)^10	365	Dinucleotide
HN7TS9H03GKU34	AGCTTCCATCAATTTCAGCCAG	60.01	45.455	274	GGCCTATGTGCTTCTCAGC	59.043	57.895	478	357	(CT)^8	373	Dinucleotide
HN7TS9H03GKU8H	CCAGCATAGTTGGCTTGGAG	59.367	55	104	AGCCAGTTTAATGCTCCCTAC	58.485	47.619	451	384	(GT)^8	400	Dinucleotide
HN7TS9H03GL1NV	CCCTCCAATGTGGTTTAAATGG	58.297	45.455	24	TGCTGTGTCTCCACAGAAG	57.753	52.632	395	127	(GT)^8	143	Dinucleotide
HN7TS9H03GLBMK	TGAGCTCCCTTTACTTCCACC	60.146	52.381	45	TCCCTACCCACTAGGTCCC	59.764	63.158	328	86	(AC)^14	114	Dinucleotide
HN7TS9H03GLMD6	TTTGGCACTGTTTGCTCAC	57.704	47.368	60	CCTGCATGTTGGGCTTCAC	60.158	57.895	254	133	(AC)^8	149	Dinucleotide
HN7TS9H03GLPP0	AAATTTGGAATGCCCTCTGG	57.013	45	130	TGGCCCAGTGTTCAGTTATTTG	59.879	45.455	299	199	(AC)^11	221	Dinucleotide
HN7TS9H03GLPUU	GGAGCAGGTTAGTTACAAAGGC	60.012	50	172	AGTTTACAGGCCAAACCAAGTAG	59.632	43.478	455	260	(AT)^8	276	Dinucleotide
HN7TS9H03GLU9K	AAGGCGATGTCCAGTGAGC	60.829	57.895	89	CAGCAGGCTTATCGGTGTC	59.054	57.895	519	427	(GT)^9	445	Dinucleotide
HN7TS9H03GLV2N	CCAGGCACATGCTTTAACCG	60.573	55	39	ACAGCCTGATGAGGACACC	59.777	57.895	287	213	(AG)^11	235	Dinucleotide
HN7TS9H03GLVNF	GCAAATCTCCCGAACTGGG	59.264	57.895	137	ATGCAAGCAGAGATGGCCG	61.574	57.895	508	238	(AC)^11	260	Dinucleotide
HN7TS9H03GLXMQ	AGAACCTATGCTTGACAGGG	57.676	50	298	AGATAGAGATGCTTCCTGCTTTG	59.065	43.478	592	540	(AC)^8	556	Dinucleotide
HN7TS9H03GMEA1	AGAGGGCCTTGGTTTGTCC	60.311	57.895	76	ATCTCCTGGCAGCTTTGGG	60.463	57.895	377	260	(CT)^11	282	Dinucleotide
HN7TS9H03GMFE5	TGGCTGGGATTGGCTACAG	60.157	57.895	275	CCTGGGTGAATTTGAGACCC	58.923	55	445	394	(AT)^9	412	Dinucleotide
HN7TS9H03GMRIE	CCCAAGACTTTGCAGCTTCC	60.152	55	28	AACCCACCCTGAGACCTTC	59.308	57.895	304	85	(CT)^8	101	Dinucleotide
HN7TS9H03GMSEI	GCATGGCTCCTGCAAAGTC	60.232	57.895	102	GCATGATTTGAGATTTCCCGTG	59.05	45.455	504	403	(AC)^8	419	Dinucleotide
HN7TS9H03GN231	TCTCAGCACTGGAGTTGATTG	58.71	47.619	95	TCTGTGATTGGCTACATTTCTCG	59.578	43.478	518	304	(AG)^8	320	Dinucleotide
HN7TS9H03GNCZV	TTGCTGCCACATGGTCTTG	59.408	52.632	73	AGGCATCATCCACACTGGC	60.839	57.895	307	229	(GT)^9	247	Dinucleotide
HN7TS9H03GNI3C	GCTTAATGAGAGCACCTTAGGAAAC	60.704	44	145	TCTTCTGACACTACAGATGCC	57.883	47.619	365	204	(AC)^16	236	Dinucleotide
HN7TS9H03GNJEM	CACGCCTCCAAGAAGACTG	58.904	57.895	51	TTAGGCAACTGCGTAGGGC	60.83	57.895	499	427	(AC)^8	443	Dinucleotide
HN7TS9H03GNPY5	GCAGCAAAGGATGTCCCAC	59.86	57.895	357	AAACGGAGAAATCAGCAAGG	57.08	45	520	460	(AC)^8	476	Dinucleotide
HN7TS9H03GNSZC	ACCTTTCTAGCCTCTTCCCAG	59.586	52.381	419	GGACCTCGAACTCCGATCC	60.009	63.158	745	483	(AC)^8	499	Dinucleotide
HN7TS9H03GNT5R	ACCACAGCACTGGTTAGAC	57.742	52.632	72	GAGGGAGAGCAAATTCCACG	59.374	55	438	117	(AG)^9	135	Dinucleotide
HN7TS9H03GNVRM	TGCTTGTTCATGCCTTCCC	59.099	52.632	479	TCCTGACCACTTGACTTTCC	57.832	50	648	575	(AC)^8	591	Dinucleotide
HN7TS9H03GOHN7	CTGAGGTGTTGGAGCAAGC	59.491	57.895	230	TGGTATCCCTATGTTTCTAAAGGTG	58.89	40	450	372	(AC)^14	400	Dinucleotide
HN7TS9H03GOJR5	CCCAGCCAACTTTCTGCAC	60.083	57.895	180	ACGCATGTTGTGAGGTCCC	61.055	57.895	553	461	(GT)^9	479	Dinucleotide
HN7TS9H03GOT6R	CCCTCCTGAGTAAGGCTAGG	59.058	60	38	ACGTTTCCAGAAAGGCAGTC	59.157	50	240	174	(AT)^9	192	Dinucleotide
HN7TS9H03GOXD2	CCTCCATGTTTCTCCCAGC	58.572	57.895	112	TTTCTCGGCCAAAGCTGAC	59.116	52.632	339	250	(GT)^9	268	Dinucleotide
HN7TS9H03GOYFC	AAGTGGCTCCAGGGAAGTG	60.004	57.895	43	AGTACGTTGGTTTAACAATGGG	57.656	40.909	388	332	(AT)^11	354	Dinucleotide
HN7TS9H03GP25O	CCTGAACTCCAGTCACCTGC	61.077	60	322	GTGATGTCTGGATGTAGCCG	58.885	55	633	383	(AC)^8	399	Dinucleotide
HN7TS9H03GP8MS	ACTAGGGAGGTTGAGAGGTTC	58.955	52.381	92	CCAAGCCAGTTTGAGCCAG	59.785	57.895	457	173	(GT)^13	199	Dinucleotide
HN7TS9H03GPJLN	TACCAGAACTGCTAGCGCC	60.232	57.895	253	CCTTGTCAAATAGCCCATATAGTTAGG	60.177	40.741	535	438	(AC)^10	458	Dinucleotide
HN7TS9H03GPNOO	AAAGTGCCACGCACGTATC	59.573	52.632	184	CAAGGCATTACCTGGGAGC	58.953	57.895	492	357	(GT)^11	379	Dinucleotide
HN7TS9H03GPQ8Z	CCCTCCTGAGTAAGGCTAGG	59.058	60	38	ACGTTTCCAGAAAGGCAGTC	59.157	50	239	174	(AT)^9	192	Dinucleotide
HN7TS9H03GPWEX	CAACTGAATGCACAAAGCCG	59.321	50	21	CACTTGAGGCAGGAAGCTG	59.191	57.895	345	91	(AG)^12	115	Dinucleotide
HN7TS9H03GPWX3	TGCCTTGAACCACTGTTCTG	59.077	50	257	ATACATGGGATGGTACTATGGG	57.306	45.455	583	365	(AG)^9	383	Dinucleotide
HN7TS9H03GQ6XT	AGTGACTTGCTCAAAGATATGGC	59.824	43.478	2	CAAGCACACTTACCTGGGAG	58.939	55	383	94	(AC)^9	112	Dinucleotide
HN7TS9H03GQLP6	GCAATGGTGTCTTGGGCAG	60.158	57.895	152	CAGAGCAAGCAGCTGTAAATTG	59.248	45.455	508	461	(GT)^8	477	Dinucleotide
HN7TS9H03GQNFZ	GCGTGCGATAGCCAATGAG	60.158	57.895	440	TGCTAAACATGGTTGGGCAG	59.504	50	640	492	(GT)^11	514	Dinucleotide
HN7TS9H03GQXWA	ACGATTTGTGCATAACAGGGTG	60.272	45.455	71	AGAGTGATGAGTTCCACCAG	57.323	50	496	378	(AC)^8	394	Dinucleotide
HN7TS9H03GR4CQ	AGAAAGTGCAGCTATGGAGG	58.055	50	34	TGAGTGCCAGACGCTATTC	58.001	52.632	351	228	(CT)^12	252	Dinucleotide
HN7TS9H03GR740	ATGGCGTCCCGATTAGGAG	59.705	57.895	227	AAAGGCCTGGCTGAAGAGG	60.387	57.895	620	366	(AC)^8	382	Dinucleotide
HN7TS9H03GRDLX	TGTACATTGGTTGCCTGTAGC	59.327	47.619	59	GCTTCAACCCAAAGACCCG	59.787	57.895	389	135	(GT)^10	155	Dinucleotide
HN7TS9H03GRGER	CCTGGCATGAGGTCCTTGC	61.508	63.158	0	TCATGAATCACAGGAGTTATAGAGTTC	59.365	37.037	234	97	(AC)^15	127	Dinucleotide
HMEZZP203F0NLP	AGCTGTGGAGGTGTGAAGC	60.684	57.895	132	AGGTCTGCTGGTATCTTGGTC	59.938	52.381	365	197	(AGAT)^9...(AGT)^8	313	Interrupted/Compound Interrupted
HMEZZP203F456S	AGGGAAATGTGCTGAATGTAGAC	59.507	43.478	8	AGGATGCTGATACGGAAGG	57.043	52.632	411	232	(ATCT)^8...(ATCT)^8	312	Interrupted/Compound Interrupted
HMEZZP203FH2Y2	GGATTGGCTAGGAGCCTCTG	60.368	60	13	TGCCTCGTGGGTACATTTC	58.205	52.632	249	132	(GT)^9...(ATCT)^11	219	Interrupted/Compound Interrupted
HMEZZP203FJ6PY	TGTGGTGAACAGAGATTACCAAG	59.129	43.478	84	GTCCTTCTTTCGTCCACAGC	59.592	55	395	117	(GCT)^8...(ATT)^7	165	Interrupted/Compound Interrupted
HMEZZP203FLOWJ	ATGGAACAGGGACACCAGC	60.386	57.895	23	AGGACATAAGACCTCCCAGC	59.272	55	248	80	(AAG)^7...(AAC)^6	125	Interrupted/Compound Interrupted
HMEZZP203FSTY1	TAGGCTGAGTGGTGCTTCC	59.778	57.895	45	CATGCCTGATACCAAGTGCC	59.725	55	303	110	(GCCCT)^9...(AGCCC)^8	224	Interrupted/Compound Interrupted
HMEZZP203FULJH	ATAGATTCGGCAGGGCTCC	59.701	57.895	77	CCAGCAGAATTCCCTCCAAAG	59.666	52.381	363	165	(AGGG)^6...(AAGG)^20	272	Interrupted/Compound Interrupted
HMEZZP203G0PEJ	TCACTAATGTAGCCCAGCTC	57.479	50	45	TGATACCACCTCAGTGACAAC	58.084	47.619	205	96	(AC)^10...(GT)^8	155	Interrupted/Compound Interrupted
HMEZZP203G1MN1	GGCAACGAGGCACATCTTC	59.938	57.895	3	GCCGCTTTGAGTCAGCTTC	60.231	57.895	324	210	(AAG)^9...(AGG)^11	268	Interrupted/Compound Interrupted
HMEZZP203GC5QW	CAGTGGAGGACAGAGGTTCC	60.152	60	71	TCTCCAAAGGACAGGACATTC	58.065	47.619	220	128	(AAC)^7...(ACT)^6	165	Interrupted/Compound Interrupted
HMEZZP203GF871	CTGGTACTGTCCCTTGGGC	60.46	63.158	29	GGGACGGAGGTAAGAAATTACTATG	59.551	44	200	117	(GT)^11...(AG)^12	164	Interrupted/Compound Interrupted
HMEZZP203GMDSF	CGTGCCTTCACTGCATACTG	60.013	55	0	TTGTGTATCGCAAGCAGCC	59.568	52.632	277	136	(GTT)^6...(GAT)^7	176	Interrupted/Compound Interrupted
HMEZZP203GU5ZR	TGCATTTACTCTGCGGGTTC	59.301	50	108	GTCCAGACACTTACCAGCG	58.612	57.895	475	192	(AAGG)^6...(CTTT)^13	374	Interrupted/Compound Interrupted
HMEZZP203HAYXT	TCGCTTCCTGTGGAGGTTC	60.082	57.895	17	ATCCAGGTAACCGCCCAAC	60.461	57.895	284	204	(GT)^10...(GT)^9	243	Interrupted/Compound Interrupted
HN7TS9H02C0GUF	TCCCTGGCCCTTATTCTGG	59.145	57.895	94	TCGACACTGTAGGCTGACG	59.864	57.895	466	182	(CTGT)^6(CT)^9...(AC)^9	243	Interrupted/Compound Interrupted
HN7TS9H02C0HXL	GTTCTGCCTTTGGACCTTCAG	59.875	52.381	152	GGGAGACTGGCCTGCTATG	60.308	63.158	558	293	(ATAGT)^13...(AGCAT)^8	410	Interrupted/Compound Interrupted
HN7TS9H02C0WOD	GGCTGGGTACAAATGCAGTC	59.939	55	63	AAGCAGAAACAGGATTCCAAC	57.467	42.857	487	308	(AGGG)^6...(AAGG)^12	383	Interrupted/Compound Interrupted
HN7TS9H02C1AW9	CTCTCTCCTTGGAGGCACG	60.232	63.158	76	AGGAATGGAAGCAGTCGGG	60.157	57.895	452	361	(GTT)^9...(CCT)^7	423	Interrupted/Compound Interrupted
HN7TS9H02C1M2F	CCCAATCAATGCCGTTCTTCC	60.62	52.381	41	TGCCTGGGTGGCTAATTCC	60.464	57.895	388	199	(GAT)^12...(AC)^8	324	Interrupted/Compound Interrupted
HN7TS9H02C2BQ5	GTTCTGCCTTTGGACCTTCAG	59.875	52.381	152	GGGAGACTGGCCTGCTATG	60.308	63.158	558	293	(ATAGT)^13...(AGCAT)^8	410	Interrupted/Compound Interrupted
HN7TS9H02C34ZD	TGCATCTACCAGTGATCCG	57.377	52.632	27	TGCTAGTCAGCCTGTGGAC	59.78	57.895	340	76	(GCTGT)^6...(ATGCT)^9	179	Interrupted/Compound Interrupted
HN7TS9H02C4L95	AGACCCATGGTCCCACAAG	59.694	57.895	162	GATTAGCCGAATGCCTCCAC	59.516	55	492	422	(GT)^8...(AG)^8	455	Interrupted/Compound Interrupted
HN7TS9H02C4VBQ	TGCGAAAGGGAACAGGTTG	59.035	52.632	4	TCTCCTTGGTCATTCCCAGC	60.151	55	445	315	(AAGG)^7...(AGGG)^8	372	Interrupted/Compound Interrupted
HN7TS9H02C4X2V	CCGAAGGTCTTAGGGCAGG	60.233	63.158	66	GCTGAGACGCATGGGAAAG	59.643	57.895	429	112	(ATC)^6...(AAT)^9	159	Interrupted/Compound Interrupted
HN7TS9H02C55LA	AGTATGCAGGCCTAGTCTCC	59.058	55	15	AACAAGAGGCCCAATGCTG	59.096	52.632	345	176	(AC)^13...(AC)^10	224	Interrupted/Compound Interrupted
HN7TS9H02C64T7	AGGTTCTGGAGAGGTTCAGC	59.788	55	2	TCCACCAAGGAAGAACCCAG	60.004	55	273	197	(GT)^8...(AG)^9	232	Interrupted/Compound Interrupted
HN7TS9H02C6M3E	CCAGTCCTGGAGGAACAGC	60.459	63.158	290	CAGACGCAAGCCAAGAAGG	59.864	57.895	449	328	(GT)^10...(AGGG)^11	397	Interrupted/Compound Interrupted
HN7TS9H02C96VI	AGTGTTCATGATCTTGCTGGG	59.045	47.619	55	ACCTTGCAGACCTTCAGCC	60.688	57.895	388	140	(GT)^13...(ATC)^10	358	Interrupted/Compound Interrupted
HN7TS9H02C9RQ7	AGCCTGTGTGATGCAAACG	59.789	52.632	71	TCTGGCAGGATTGTACAGGG	59.86	55	472	165	(ATT)^7...(ATT)^7	215	Interrupted/Compound Interrupted
HN7TS9H02CWRH6	TGGGATCTTAAGGTGAAGGGC	60.216	52.381	353	CAGGGCTGCAAACAAGCTG	60.748	57.895	630	417	(CTTTT)^6...(CTTT)^11	496	Interrupted/Compound Interrupted
HN7TS9H02CY236	AGGCCCAAACACTTCTTGC	59.326	52.632	98	TGCTTTGTGGCTCCTCCAG	60.687	57.895	487	318	(AGGG)^6...(AAGG)^17	425	Interrupted/Compound Interrupted
HN7TS9H02CZQU5	TCACTTCCAGCACGGTAGG	59.782	57.895	161	CTGCAGGACAACAGAGGTG	58.819	57.895	506	358	(CATTT)^10...(CCATT)^8	460	Interrupted/Compound Interrupted
HN7TS9H02D0NAS	ATTTGCACCACTTCCAGGG	58.707	52.632	210	AATAGGACGCAGGGTGACG	60.232	57.895	570	239	(AATG)^7...(ATT)^6	429	Interrupted/Compound Interrupted
HN7TS9H02D11WF	TGCCATTACCTTGGTGGTTAAG	59.347	45.455	60	TGGATGCAGCCTATGACCC	59.928	57.895	274	133	(AGGG)^8...(AAGG)^13	220	Interrupted/Compound Interrupted
HN7TS9H02D3D1P	GCAACTTTCACACATGCTATTCG	59.896	43.478	90	GGAAGCTGGATACAACAGGC	59.369	55	444	207	(AT)^8...(AC)^8	261	Interrupted/Compound Interrupted
HN7TS9H02D3NH1	TGGTTTGTAGGCCAGTTTGC	59.722	50	500	CGATCCACTCTACACCGGC	60.672	63.158	731	603	(GGAT)^7...(GGAT)^6	664	Interrupted/Compound Interrupted
HN7TS9H02D579R	GCTAGCATCCCATGAAGCTG	59.513	55	19	TTCCCTTTGCCTGAGACGC	61.055	57.895	207	64	(CT)^9...(AC)^10	103	Interrupted/Compound Interrupted
HN7TS9H02D57VB	CCAGTCCTGGAGGAACAGC	60.459	63.158	290	CGTGGGATGATTCAGACGC	59.429	57.895	462	328	(GT)^10...(AGGG)^11	397	Interrupted/Compound Interrupted
HN7TS9H02D5L94	GCAACTTTCACACATGCTATTCG	59.896	43.478	90	TGCAGTTGACTACGCTCCG	60.817	57.895	539	207	(AT)^8...(AC)^8	261	Interrupted/Compound Interrupted
HN7TS9H02D6ZCU	ACCTCTCATATTAGCCTTTGGAC	58.48	43.478	77	GGTCGTGCAGAAGGAATGC	59.938	57.895	388	280	(GT)^8...(AG)^11	319	Interrupted/Compound Interrupted
HN7TS9H02D9YSL	CGCTGCCTAAAGTGATGGG	59.343	57.895	69	TTGGCTGTGCTGCAAGAGG	61.655	57.895	422	250	(ATCT)^15...(ATCC)^7	340	Interrupted/Compound Interrupted
HN7TS9H02DA1BJ	AGTCCACTGCTTGTTCTGG	58.04	52.632	64	TGTCAGCATGGGTTCATTGC	59.866	50	344	135	(ATT)^15...(AC)^10	224	Interrupted/Compound Interrupted
HN7TS9H02DA933	CTTTGCTGAGGGAGCATCAC	59.656	55	72	AGTGGAGGAACACCTATCAGC	59.938	52.381	341	200	(GTT)^9...(CTTT)^9	295	Interrupted/Compound Interrupted
HN7TS9H02DC8YM	GCTTTGAGTCAGCTTCGGC	60.231	57.895	355	TAATGGCTGGTGACCCGTG	60.459	57.895	576	402	(GTT)^14...(CTT)^8	513	Interrupted/Compound Interrupted
HN7TS9H02DCUKY	TGCATCTACCAGTGATCCG	57.377	52.632	27	TGCTAGTCAGCCTGTGGAC	59.78	57.895	340	76	(GCTGT)^6...(ATGCT)^9	179	Interrupted/Compound Interrupted
HN7TS9H02DEPA0	GTCTGGCTTTCGCACCAAC	60.45	57.895	14	TCCCACTCAGAGGTCCATAAG	59.026	52.381	416	215	(ATCT)^7...(ATCC)^6	283	Interrupted/Compound Interrupted
HN7TS9H02DF9T4	GCGGAAAGGGAATCACTGC	59.937	57.895	6	TCTCCTACATTGTGACTAAGAGAAC	58.616	40	301	194	(AGAT)^10...(AG)^8	260	Interrupted/Compound Interrupted
HN7TS9H02DHCS3	GCCACTGCTCATTCCCTTG	59.561	57.895	274	AGAGTGTCGCTCGTTACCC	59.861	57.895	612	401	(AT)^8...(AT)^8	452	Interrupted/Compound Interrupted
HN7TS9H02DHKQR	CAGAAGGAACAAGACACCTCC	58.986	52.381	483	ACGACAGTACCAGAGACCC	58.797	57.895	745	617	(AAAT)^6...(GT)^9	666	Interrupted/Compound Interrupted
HN7TS9H02DI46N	GTGTCTTTCTGCTTATCTAATGCAAC	59.799	38.462	6	GGCCACTATGTGAGGCAAG	58.962	57.895	345	59	(AAG)^6...(AGG)^19	141	Interrupted/Compound Interrupted
HN7TS9H02DIDPZ	GTGTCAAAGTTGTGTACCAGGG	60.142	50	109	TGCATACAAGGCAAGTTGGG	59.504	50	400	194	(CTTT)^7...(CTTT)^7...(CTTT)^6	316	Interrupted/Compound Interrupted
HN7TS9H02DIOHX	GTGTCTTTCTGCTTATCTAATGCAAC	59.799	38.462	6	GGCCACTATGTGAGGCAAG	58.962	57.895	345	59	(AAG)^6...(AGG)^19	141	Interrupted/Compound Interrupted
HN7TS9H02DK5VZ	TGCATCTACCAGTGATCCG	57.377	52.632	27	TGCTAGTCAGCCTGTGGAC	59.78	57.895	340	76	(GCTGT)^6...(ATGCT)^9	179	Interrupted/Compound Interrupted
HN7TS9H02DKVGG	GACAGGTTCTGCCTGGATTAC	59.124	52.381	4	TCACCCAGTGTCAAGAGGC	60.006	57.895	213	56	(ATCT)^9...(CTGT)^7	118	Interrupted/Compound Interrupted
HN7TS9H02DL465	TGCTGGCTGCCTGGTAAAG	61.063	57.895	118	GCAGCTTCGTGCACATCC	60.241	61.111	527	196	(GTT)^9...(ATT)^22	296	Interrupted/Compound Interrupted
HN7TS9H02DQ5NP	GGACTTCAGGCTTCCAGGG	60.461	63.158	193	GCATTTGTTGTTCCACCTTTGG	59.884	45.455	492	300	(AG)^8...(AAT)^7	452	Interrupted/Compound Interrupted
HN7TS9H02DQBFW	CGCTTCCTTCAAGTTATTCAGC	58.737	45.455	47	AATGCATCCTCCTCAGGGC	60.234	57.895	380	104	(ATT)^10...(AAT)^16	185	Interrupted/Compound Interrupted
HN7TS9H02DQMF3	GCCTGAATTGTGAGGTGCC	59.86	57.895	103	AGGGCTGTTCAGGACCAAG	60.004	57.895	378	163	(ACT)^6...(AC)^12	218	Interrupted/Compound Interrupted
HN7TS9H02DQWP2	TCTTGGAAAGAGAAATGATTCTAGACC	59.742	37.037	42	TGGGCAACTATTTGGCAATC	57.411	45	488	104	(AAT)^7...(AACTT)^9	271	Interrupted/Compound Interrupted
HN7TS9H02DSINJ	ACAGGCAAGGAGGGAACTG	60.004	57.895	79	AGTTGCTACGGCATCTTTAGG	58.851	47.619	508	240	(AG)^9...(AG)^9	278	Interrupted/Compound Interrupted
HN7TS9H02DTEEI	GCCTGAATTGTGAGGTGCC	59.86	57.895	105	ACCATACGAAGTCAGCTTGC	59.02	50	257	147	(ACT)^6...(ACT)^6...(AC)^11	224	Interrupted/Compound Interrupted
HN7TS9H02DTTC6	ACACCACCTAAAGAACTGGC	58.49	50	288	AGAAAGCTGCTCAAGCATGG	59.58	50	621	330	(AAT)^6...(AAT)^8	408	Interrupted/Compound Interrupted
HN7TS9H02DVA3E	GGTGATGCAGAAAGACCTGC	59.94	55	217	CCATGGTGTCATGTTGCCC	59.858	57.895	559	267	(AAG)^6...(AGG)^22	349	Interrupted/Compound Interrupted
HN7TS9H02DYSRW	GAGGGCCACATGCTATTGTC	59.44	55	11	GTCAGGGTGACATGGAAGC	58.887	57.895	340	196	(ACCT)^6...(ATCT)^9	264	Interrupted/Compound Interrupted
HN7TS9H02EAANN	GTGGCCAGATTGGCTTCAC	59.86	57.895	191	GACCGTTTACTTACGGTTCCC	59.409	52.381	633	423	(ATCT)^11...(AC)^15	499	Interrupted/Compound Interrupted
HN7TS9H02EAKAT	GAGCCAATCCGTGCATTCC	60.01	57.895	196	GACCAGTCCAAATGCTGCC	59.86	57.895	553	372	(AGAT)^13...(GAGT)^7	463	Interrupted/Compound Interrupted
HN7TS9H02EBDQB	TGCAATCCAGCCTCAGACC	60.46	57.895	280	GTGAGCTGTGCCATTCCTTC	59.94	55	618	322	(AAGG)^9...(AGGG)^10	395	Interrupted/Compound Interrupted
HN7TS9H02ECH9L	GGGAGGAATAGGGAGTATCGC	59.94	57.143	150	CACAGCACGGATCAGATTACC	59.543	52.381	483	318	(AT)^10...(AT)^9	414	Interrupted/Compound Interrupted
HN7TS9H02EDVMW	CTGCCAGCATATGTCACTCC	59.159	55	115	GGCCAACTGGCAAGCATC	60.164	61.111	527	371	(CT)^8...(AC)^8	404	Interrupted/Compound Interrupted
HN7TS9H02EE56F	TGCGCAGCAAGTTGGAAAG	60.379	52.632	18	CCTCTTGGCAATAAGAGCTCAC	59.817	50	361	100	(ATCT)^7...(ATCT)^12	270	Interrupted/Compound Interrupted
HN7TS9H02EG4IG	AGCCAGTGTTCTGACATACTTC	58.832	45.455	92	TGCACAACAGGCACTTTCC	59.634	52.632	337	219	(ACT)^8...(ACT)^8	270	Interrupted/Compound Interrupted
HN7TS9H02EH7TV	TCAAGCAACCTTATGCAGCC	59.58	50	45	CACAGCCAACGTGGACTTC	59.792	57.895	494	147	(AGGG)^7...(AGGG)^8	214	Interrupted/Compound Interrupted
HN7TS9H02EHUPW	TGTACTGGCCATAGATCTGCC	60.077	52.381	83	CCCACCCTACTGGTTCTGG	59.775	63.158	343	201	(AGGG)^6...(AG)^12	263	Interrupted/Compound Interrupted
HN7TS9H02EKFAF	TGCAATCCAGCCTCAGACC	60.46	57.895	276	AGACTCGAACCTGTACGCC	59.861	57.895	654	318	(AAGG)^9...(AGGG)^10	391	Interrupted/Compound Interrupted
HN7TS9H02ELO9B	ATAGCTTGGGTGCCTTGGG	60.464	57.895	266	GGAATTACTAGCAAGGTCATAACAGG	60.293	42.308	553	418	(ATGGT)^7...(ATGGT)^11	513	Interrupted/Compound Interrupted
HN7TS9H02ENDCR	ACACACCAACATGCTCTTTG	57.586	45	28	ACACCTAGTATCATGTCTGCC	57.659	47.619	446	97	(ATT)^16...(ATT)^18	384	Interrupted/Compound Interrupted
HN7TS9H02EOC7P	ACAGGGTTACCAAGAATAGCTG	58.55	45.455	241	GCCTTTCTGTCTGCTTAAGGG	59.67	52.381	522	408	(AGAT)^11...(AGAT)^9	491	Interrupted/Compound Interrupted
HN7TS9H02EP6RZ	ACACCACCTCCTGACATGC	60.385	57.895	112	TCAACTCACTTGCCACCAG	58.35	52.632	487	255	(AAT)^6...(AAT)^6	315	Interrupted/Compound Interrupted
HN7TS9H02EPJQG	AACCAGGCTGTATGGGAGC	60.157	57.895	253	GGAGGCGTCTACGTACCTG	60.011	63.158	565	456	(CT)^8...(AC)^8...(AC)^12	515	Interrupted/Compound Interrupted
HN7TS9H02EPP1E	ACTTGGTCCTCCAGCCAAC	60.31	57.895	170	CGAGCTGAGTTTCCATTTGC	58.481	50	619	349	(CTT)^19...(AGG)^6	551	Interrupted/Compound Interrupted
HN7TS9H02EQPA9	GCAAACAGTTCACTTTGATATTCTG	58.198	36	155	GCCCACCAATTGCTTCTGG	60.158	57.895	340	193	(ACT)^8...(ACT)^7	244	Interrupted/Compound Interrupted
HN7TS9H02EQPHY	GTGTCTTTCTGCTTATCTAATGCAAC	59.799	38.462	6	GGCCACTATGTGAGGCAAG	58.962	57.895	345	59	(AAG)^6...(AGG)^19	141	Interrupted/Compound Interrupted
HN7TS9H02EQSYJ	GCAGCAGAAGTTAAGGAGGTC	59.402	52.381	384	TCCAAACTGGCTTGCCATC	59.099	52.632	589	463	(AAC)^6...(AAT)^7	511	Interrupted/Compound Interrupted
HN7TS9H02EQVK2	ACTGGCTAACCTTTGCAGTC	58.86	50	60	ACATTCCCTGCTCAAACTAAGG	59.082	45.455	421	171	(AC)^8...(ATC)^8	253	Interrupted/Compound Interrupted
HN7TS9H02EQWX0	ACCTGCCGGGAAAGATCAC	60.46	57.895	211	CTAAGGCTGTGCGATCAGG	58.755	57.895	530	347	(AAT)^8...(AAT)^7	393	Interrupted/Compound Interrupted
HN7TS9H02ERHKP	TCCAAACTTGAGTTGGCACAG	59.737	47.619	197	ACCTGAATGGAGAGGTTGC	57.794	52.632	374	254	(AC)^9...(AG)^10	340	Interrupted/Compound Interrupted
HN7TS9H02ERVYH	CCCTGGTCTGTATTGAAAGTAGC	59.574	47.826	381	GTGACGTGCCCTCTACTGG	60.528	63.158	693	435	(AAG)^7...(AGG)^10	484	Interrupted/Compound Interrupted
HN7TS9H02ESCR8	CCACATTGCTTGGGTCCAC	59.783	57.895	31	TTCAGCCCACTGTTCAAGC	59.031	52.632	456	144	(AAG)^6...(AGG)^9	187	Interrupted/Compound Interrupted
HN7TS9H02EUAAB	AGTTCTTTGAAGGGCTGGC	58.716	52.632	66	CCACCGCATGGATCGTTTC	60.012	57.895	294	100	(AAT)^12...(GAT)^7	172	Interrupted/Compound Interrupted
HN7TS9H02EUO7M	CCATGGGAGGAGTGAAGCC	60.537	63.158	449	TCGACCTACGGATGGCAAG	59.934	57.895	620	479	(GT)^8...(ACAG)^10	583	Interrupted/Compound Interrupted
HN7TS9H02EX4CW	ACAGTCTTCTATGATTCAGGTTGC	59.59	41.667	52	TTGTGCAGTAAACCGGCAG	59.416	52.632	283	86	(CTGT)^8...(ATCT)^10	180	Interrupted/Compound Interrupted
HN7TS9H02EXAJ2	GCTTTGGGTCAGCTTCGG	59.466	61.111	8	TGCTACACACCAGGGATGG	59.775	57.895	361	58	(CTT)^13...(ACT)^9	126	Interrupted/Compound Interrupted
HN7TS9H03F1L3L	CGTCGTGCAAGCCACTAATC	60.359	55	98	CTTCGTTTCAACCGGCCTC	59.866	57.895	411	255	(CT)^9...(AC)^10	294	Interrupted/Compound Interrupted
HN7TS9H03F3TD6	CTGTTTCTCCGTGCCAAGC	60.158	57.895	236	GGCAGAGCAGTTACGACTTC	59.386	55	531	396	(CTTT)^14...(CT)^12	490	Interrupted/Compound Interrupted
HN7TS9H03F4A0G	AGCCACCTATGATCGCCTC	59.704	57.895	50	CAAGGCTGGAGGTTTGCG	59.777	61.111	369	117	(CT)^8...(AGC)^9	298	Interrupted/Compound Interrupted
HN7TS9H03F8ZID	CAGCCAACCTAGCTGTTCG	59.276	57.895	15	ACGTAATGTCCAGTGGGTC	57.519	52.632	445	179	(GTT)^6...(CTT)^6	224	Interrupted/Compound Interrupted
HN7TS9H03F95EB	GCCAAGCTGTGTGGCTTC	60.087	61.111	15	ATCCTGAACGTTTGGTGCC	59.108	52.632	393	95	(GT)^13...(AG)^8	312	Interrupted/Compound Interrupted
HN7TS9H03F9LPV	GGAGGCAGATTTCAATGACCAG	60.077	50	64	AGAAATGCCAATCAGCAGGC	59.937	50	483	230	(GGTTT)^12...(AC)^9	356	Interrupted/Compound Interrupted
HN7TS9H03FIF6G	GGATGAGCGCCCTCTACTG	60.381	63.158	39	GCCCATGAATCAGGACTGC	59.336	57.895	387	246	(CTT)^13...(CTT)^6	309	Interrupted/Compound Interrupted
HN7TS9H03FJ4BF	CGACCGAATTGGTGCTCATC	60.083	55	33	TTGGGCTGGCAAGAGTGTC	60.987	57.895	247	137	(AC)^8...(AC)^12	179	Interrupted/Compound Interrupted
HN7TS9H03FJSI3	TGTTCACCCAAGCATTCCC	58.711	52.632	35	GCTGATCTGACCCACTTGC	59.267	57.895	328	204	(AGAT)^9...(ACAT)^7	275	Interrupted/Compound Interrupted
HN7TS9H03FJYQ2	TGACTGAAGCAAGTTTGGTAATG	58.325	39.13	13	GGTCAGTGTGATTGCTGCC	59.862	57.895	289	90	(ATT)^16...(GAT)^6	177	Interrupted/Compound Interrupted
HN7TS9H03FKUT5	TCTTCACTCAGGTCTTTGATGC	59.095	45.455	59	CCATAAGGGCAAAGTGGGC	59.554	57.895	451	102	(AGGG)^9...(AAAT)^6	275	Interrupted/Compound Interrupted
HN7TS9H03FP5RR	CCCTGTGGGATAGGGCAC	59.842	66.667	171	AGGAAGGCTGCTTACCCTG	59.774	57.895	539	340	(AAAT)^6...(ATT)^11	446	Interrupted/Compound Interrupted
HN7TS9H03FPEIW	AGTAGAATTTGAGGGTCCTGC	58.133	47.619	88	AGAAGCATATTGGGACAGTCAG	58.622	45.455	348	143	(ATT)^20...(ATT)^6	248	Interrupted/Compound Interrupted
HN7TS9H03FQGUP	AGTGTTTCTGCAAGATTTCCC	57.467	42.857	61	CTCACTATCTAATTTGCTCCATCAG	58.112	40	355	191	(GGT)^11...(AGG)^9	269	Interrupted/Compound Interrupted
HN7TS9H03FQVAT	AGACATCATTTGGAATTCAAGGAC	58.252	37.5	93	TCCCTCTGGAAACCTCAGC	59.39	57.895	359	148	(AC)^12...(AAT)^6	323	Interrupted/Compound Interrupted
HN7TS9H03FSQZJ	CAGCAGGAGAGGCCATAGG	60.006	63.158	33	TGGCCAACATTCCACAGTTC	59.433	50	287	81	(AGGG)^9...(AAGG)^18	192	Interrupted/Compound Interrupted
HN7TS9H03FT41P	AACGTCAAGTCATGCTACAAC	57.594	42.857	150	GTGGCACTGCATCCTTTGG	60.158	57.895	380	223	(AGAT)^12...(ACAG)^6...(AGAT)^7	323	Interrupted/Compound Interrupted
HN7TS9H03FTLVL	TGGCCTCTGTTGACTAGGG	59.083	57.895	52	TCTCAGCTGTCCTTCCACG	59.783	57.895	425	199	(ATC)^6...(AGG)^8	361	Interrupted/Compound Interrupted
HN7TS9H03FV0W1	AAGATGCATTGTGCTGGCG	60.232	52.632	170	TGCATTGTCTGCTAGATGAGC	59.196	47.619	432	301	(GT)^12...(GT)^8	385	Interrupted/Compound Interrupted
HN7TS9H03FVSKC	TGTATGCATTTGTTGTCCCAC	57.824	42.857	46	GGACTTCAGGCTTCCAGGG	60.461	63.158	355	98	(ATT)^7...(CT)^8	250	Interrupted/Compound Interrupted
HN7TS9H03FWKIR	CAGCCAACCTAGCTGTTCG	59.276	57.895	15	ACGTAATGTCCAGTGGGTC	57.519	52.632	448	181	(GTT)^6...(CTT)^6	226	Interrupted/Compound Interrupted
HN7TS9H03FWXHN	ACTGGCTAACCTTTGCAGTC	58.86	50	60	ACATTCCCTGCTCAAACTAAGG	59.082	45.455	419	171	(AC)^8...(ATC)^8	253	Interrupted/Compound Interrupted
HN7TS9H03FXEWC	TCTTCACTCAGGTCTTTGATGC	59.095	45.455	59	CCATAAGGGCAAAGTGGGC	59.554	57.895	450	102	(AGGG)^9...(AAAT)^6	274	Interrupted/Compound Interrupted
HN7TS9H03FYC1X	TCGAAGGCTAGAAACCAGAGG	59.94	52.381	53	GGGCAATAGGGTATATGGCAATC	59.821	47.826	420	234	(AGAT)^8...(AGAT)^10	358	Interrupted/Compound Interrupted
HN7TS9H03FYPZ0	TGTTCAGTCCCAGCTTCCTC	60.079	55	168	CGCAGTCTCATGCCACATC	59.72	57.895	535	329	(AAGG)^6...(AAGG)^16	441	Interrupted/Compound Interrupted
HN7TS9H03G3GNM	CCTGTCTGCCGTGTAGAGG	60.232	63.158	307	CGACAACAAATCCCTAAATCATTGG	59.729	40	681	521	(GTT)^6...(CTT)^6	566	Interrupted/Compound Interrupted
HN7TS9H03G4OTI	CATGCCACATCCTGCTTGC	60.601	57.895	221	TCATTCAGTTTACACAGCTGCC	59.947	45.455	594	511	(AC)^9...(AC)^8	547	Interrupted/Compound Interrupted
HN7TS9H03G57V1	TCAGACCTCTTTGGCAGGC	60.385	57.895	74	GCCCTTTCCCTCGTCTTGG	61.131	63.158	377	229	(AGT)^10...(AAT)^6	295	Interrupted/Compound Interrupted
HN7TS9H03G7J8I	TAGAGGGTGCCCATTGTCC	59.464	57.895	34	AGTTAATTCCAGGTTCTCTGTGG	58.865	43.478	409	194	(AAT)^9...(AAC)^12	260	Interrupted/Compound Interrupted
HN7TS9H03G7QUL	GCAACTTTCACACATGCTATTCG	59.896	43.478	90	GGAAGCTGGATACAACAGGC	59.369	55	444	207	(AT)^8...(AC)^8	261	Interrupted/Compound Interrupted
HN7TS9H03G84YC	AGCTCTTGAACCATTCTTAAACTC	57.959	37.5	41	AGACTGATGAGGGCCAAGG	59.465	57.895	286	129	(AAAAT)^8...(AATAG)^11	235	Interrupted/Compound Interrupted
HN7TS9H03G8US6	CCAGAAGCAATTGGTGGGC	60.158	57.895	47	TGTACCTCATCAATTTACTAGCAC	57.296	37.5	395	300	(CCT)^6...(CTT)^6	334	Interrupted/Compound Interrupted
HN7TS9H03GADPL	ACCAGATCCATAGCTGGCAC	60.296	55	174	CCATGAAGAGATTGCCTGGAC	59.464	52.381	328	206	(ATGT)^6...(ATCT)^10	286	Interrupted/Compound Interrupted
HN7TS9H03GADYR	AAGGGTTCGGGCTTAGCTG	60.46	57.895	55	CTCGCTACGGCGTTCTACC	61.024	63.158	502	124	(ATTT)^10...(AG)^8	466	Interrupted/Compound Interrupted
HN7TS9H03GE6OQ	GGACACAACCAGAAGGGAAAC	59.805	52.381	48	CAAAGCTTCCCAACAGAGCC	60.152	55	404	290	(CTTT)^7...(CTTT)^6	343	Interrupted/Compound Interrupted
HN7TS9H03GE7HJ	CTGCTCACAGCACAACTGG	59.79	57.895	22	ACGAGCAAATGAAGGGTGC	59.488	52.632	450	178	(AC)^12...(AC)^9	409	Interrupted/Compound Interrupted
HN7TS9H03GF4GW	TCAGTTCCTGCCTTCCCTATG	59.937	52.381	56	CCTTTGGACAAATGTCTTGTTGG	59.391	43.478	324	155	(ATCT)^10...(ATCT)^14	255	Interrupted/Compound Interrupted
HN7TS9H03GFJRZ	TCAGCAGGCCTTTAACATGAG	59.048	47.619	16	GGCCAGCATGTCATTACTCC	59.44	55	464	54	(CCTT)^6...(AGAT)^10	396	Interrupted/Compound Interrupted
HN7TS9H03GHGL9	GTGTCTTTCTGCTTATCTAATGCAAC	59.799	38.462	6	GGCCACTATGTGAGGCAAG	58.962	57.895	345	59	(AAG)^6...(AGG)^19	141	Interrupted/Compound Interrupted
HN7TS9H03GHTRP	TCAGACCTCTTTGGCAGGC	60.385	57.895	74	GCCCTTTCCCTCGTCTTGG	61.131	63.158	377	229	(AGT)^10...(AAT)^6	295	Interrupted/Compound Interrupted
HN7TS9H03GITFU	GGGTGACCTCATTAGGGACG	60.295	60	188	CCATGAGAAGGGTGCAATCAG	59.737	52.381	482	343	(AAT)^7...(ATT)^6	398	Interrupted/Compound Interrupted
HN7TS9H03GIWKD	CCCAAAGTACAAGGTTGGGC	59.793	55	164	AAGGAGATGTCAGAGGATGC	57.465	50	566	292	(GTT)^7...(ATCT)^13	489	Interrupted/Compound Interrupted
HN7TS9H03GL8VR	ACAAGAAACCGGAACCCAG	58.341	52.632	82	TCATGTCCTGAGGGCGAC	59.451	61.111	306	176	(AC)^13...(AC)^10	249	Interrupted/Compound Interrupted
HN7TS9H03GLRBP	CAGCCAACCTAGCTGTTCG	59.276	57.895	15	ACGTAATGTCCAGTGGGTC	57.519	52.632	446	180	(GTT)^6...(CTT)^6	225	Interrupted/Compound Interrupted
HN7TS9H03GO9XV	TGCAAACTGCCTGGAAAGC	60.008	52.632	35	TTCGGTACCAGGAAAGGTC	57.12	52.632	402	299	(AGT)^6...(ATC)^7	342	Interrupted/Compound Interrupted
HN7TS9H03GOF12	CTGACTTACCCGGGCCTTC	60.533	63.158	155	ACCAGATTCCCAGTCTGCC	59.774	57.895	433	322	(AAGG)^10...(AAGG)^6	391	Interrupted/Compound Interrupted
HN7TS9H03GQ7PV	ACAGAAGAGGCAGTTTGTCC	58.496	50	21	TGTCATGGTGGCTTGCTATTC	59.393	47.619	331	171	(AAT)^7...(ACT)^7	254	Interrupted/Compound Interrupted
HN7TS9H03GS08L	TGGGATATTGCCCTATCTGC	57.589	50	25	TGGGCTCTAGTTGAGACTGC	59.864	55	462	138	(GT)^10...(ACT)^12	423	Interrupted/Compound Interrupted
HMEZZP203F0TWW	GAGGAGTAAGAAGGGAATCTTTG	57.111	43.478	0	TTGTAGTGAAGCTGAGTCCC	57.628	50	169	110	(GGCGT)^6	140	Pentanucleotide
HMEZZP203F0ZG7	TTAAATGTAGTATCTGACTATGCCC	57.026	36	119	TTTGTGTTAATACTCTGGTGTCAG	57.664	37.5	293	167	(CTTTT)^8	207	Pentanucleotide
HMEZZP203F3Y3H	CCTGCACTAGATCCTGCC	57.552	61.111	2	GCTCTGAAAGAGGCACTGG	58.892	57.895	213	80	(CCATT)^7	115	Pentanucleotide
HMEZZP203FHW9V	ACCCAGAACAGATCCCTGC	59.774	57.895	60	CAACTGCCCTTGATTCCCTG	59.578	55	387	184	(CTTTT)^6	214	Pentanucleotide
HMEZZP203FKUEP	AGAGGGACAAGGCCACAAG	60.004	57.895	34	TGGAAGCAGGCAAATTCAGG	59.503	50	285	109	(CTATT)^12	169	Pentanucleotide
HMEZZP203FM26H	GGGTATTCTGGGTGCCCTC	60.233	63.158	73	AGGACGACAGCTTCCAAGG	60.082	57.895	492	382	(ACCTG)^7	417	Pentanucleotide
HMEZZP203FNL5P	TGTCTGCTTGTCAACAATCCC	59.531	47.619	6	TCTGTGGCCCTCCACATAG	59.16	57.895	438	77	(CTTTT)^17	162	Pentanucleotide
HMEZZP203FT7LG	TGGGAAATGTGGAAAGGCAC	59.428	50	265	AGACATCCAGAATGGCCTG	57.556	52.632	487	395	(AAAGT)^11	450	Pentanucleotide
HMEZZP203FYPUA	AAGTACGATGGGACCTCGC	59.934	57.895	5	AGAGGCGACTGTGTGAAGC	60.751	57.895	363	288	(AGGGC)^9	333	Pentanucleotide
HMEZZP203G0TL4	ACCACAGCTCTTTGTAAGGTG	58.911	47.619	29	CTCAACCACCAGCACTTGG	59.412	57.895	242	99	(ATGTT)^18	189	Pentanucleotide
HMEZZP203G8H0J	AAGTACGATGGGACCTCGC	59.934	57.895	5	AGGCGACTGTGTGAAGCC	60.712	61.111	360	302	(AGGGC)^6	332	Pentanucleotide
HMEZZP203GADND	TCTCATCTTTAGGGTGGTTATGC	58.74	43.478	36	CTGGACATTGTAGTGGCAAGG	59.671	52.381	185	92	(CTTTT)^6	122	Pentanucleotide
HMEZZP203GF2R2	GCCAGGGCAACTGGTTTAC	59.784	57.895	61	CCAGCAAGAGAGGGTCTAGG	59.646	60	346	232	(GCTCT)^8	272	Pentanucleotide
HMEZZP203GKCVR	CCTGAAACTTGTGCCAGCC	60.083	57.895	165	GCATTGCCTGACTGAAGGG	59.561	57.895	380	298	(ATGCC)^6	328	Pentanucleotide
HMEZZP203GN1Z9	CCAGATTCAAGTTGGCAAAGC	59.069	47.619	112	AAGTCAACCAGGGAACTCG	57.742	52.632	283	178	(ATGTT)^9	223	Pentanucleotide
HMEZZP203GPBKY	AGGGCGAGGATCAAAGTGC	60.834	57.895	119	CTTCTGCGCGGTAACAACC	60.231	57.895	356	153	(ATGGT)^10	203	Pentanucleotide
HMEZZP203GQJFK	GCGAGACAGAATGCTGGAC	59.354	57.895	91	ACCAACTGGTACAGGGCAG	60.004	57.895	299	234	(CCGTT)^6	264	Pentanucleotide
HMEZZP203GRPHQ	CCTAGCCATTCTGCACAAGC	60.011	55	2	GCTGAAAGGCACTCGAATCTG	60.347	52.381	184	33	(AATCC)^8	73	Pentanucleotide
HMEZZP203GRTR7	CAGATTGAGACAGGCTCTGAAG	59.234	50	31	CCATGCCAGCAGGGTAATC	59.028	57.895	424	83	(ATAGT)^13	148	Pentanucleotide
HMEZZP203GU5YJ	GCCTATGTCTTCTCATCTTTAGGG	59.226	45.833	26	TGTAGTGGCAAGGTGTCAAG	58.502	50	176	91	(CTTTT)^6	121	Pentanucleotide
HMEZZP203GX206	AAGTACGATGGGACCTCGC	59.934	57.895	5	AGAGGCGACTGTGTGAAGC	60.751	57.895	363	288	(AGGGC)^9	333	Pentanucleotide
HMEZZP203HDF7D	TCCAGTTCTTCTGATTTATGAGC	57.112	39.13	23	CCCAAACGAATAGTACAGGAAGC	60.138	47.826	211	83	(CTTTT)^6	113	Pentanucleotide
HN7TS9H02C18CY	CCATCATTCCTAACCTGGGC	58.776	55	117	ACCTTTCGACAAGCAGGTG	58.739	52.632	442	152	(AGTTT)^8	192	Pentanucleotide
HN7TS9H02C2DJJ	AGGTGACTGAGTATGGCTCC	59.278	55	26	GACTGGCTCCAAATTGCCC	59.858	57.895	384	284	(AGGGT)^11	339	Pentanucleotide
HN7TS9H02C2QDZ	AGGTAGTGAGCTGTGCAATTAAAG	60.073	41.667	179	TAGTGCTGGGAGCCTGAAG	59.472	57.895	486	215	(ATATT)^9	260	Pentanucleotide
HN7TS9H02C3UJ0	CCTTTCAATATTCTTGCCACAGC	59.332	43.478	8	GGGCAAAGTGTCCGACTTG	59.79	57.895	239	49	(GGCTT)^13	114	Pentanucleotide
HN7TS9H02C45AA	GCAAGAAACTGGCAACTGGG	60.718	55	0	TGCACTTTGCATCACAGCC	60.084	52.632	436	148	(ATGTT)^7	183	Pentanucleotide
HN7TS9H02C4ET7	CAGAAAGGAGCATTTGCACG	58.761	50	280	CTGGTCTTGTAGTTGCTTCCAC	59.948	50	482	401	(GATAT)^7	436	Pentanucleotide
HN7TS9H02C5GQQ	ACCATTGCAGTCCATCAGG	58.177	52.632	25	GCCCTAGCTAAATGTGACCC	58.788	55	252	75	(CTTTT)^11	130	Pentanucleotide
HN7TS9H02C6H39	ACCTGTTAGAGAAACATCCGC	58.783	47.619	171	ACCTAGTATAATGACAAGCATCGC	59.535	41.667	540	323	(GCTCT)^6	353	Pentanucleotide
HN7TS9H02C88DR	AAGGTGGTACTTCGGGTGC	60.384	57.895	228	GAGGGATTAGCCATCTTTGC	57.001	50	520	375	(AACAT)^7	410	Pentanucleotide
HN7TS9H02C8DZV	ACATTTGTATCCAACCCTGCTTC	60.011	43.478	38	CACTCGCTAAGTGCGAACG	60.017	57.895	220	160	(ATAGT)^6	190	Pentanucleotide
HN7TS9H02C8Q58	GACTGCAGCGAACCATGAC	59.94	57.895	132	AGAAAGTCACAGTGTTGCCC	59.077	50	351	263	(AATTT)^10	313	Pentanucleotide
HN7TS9H02C8V5K	AGCAGCTTTCAAACCACCTTC	60.078	47.619	296	CATCACACGGTGCGTCTTC	59.942	57.895	649	384	(AGAGC)^10	434	Pentanucleotide
HN7TS9H02C9OGS	AGCTGTAGCAGAATGTGGTTTC	59.685	45.455	94	AACTGGGTTTCCTCCTGGG	59.613	57.895	445	144	(AGAGT)^8	184	Pentanucleotide
HN7TS9H02C9YK0	GCTGCTGAAGTGGAATAGGAC	59.47	52.381	63	TGGCTAGGTCTGGGATTGC	59.851	57.895	324	145	(ACTCC)^7	180	Pentanucleotide
HN7TS9H02CXWC8	CCCTTTGCTTCCTATTGGGATATTG	60.538	44	21	TTTCGCAAGCAGGAGACTG	58.823	52.632	344	130	(CTGTT)^6	160	Pentanucleotide
HN7TS9H02D0YZN	GAGCAGGAGGGCTACTTGG	60.233	63.158	100	CTGCCTGGCTTCCATTGTC	59.561	57.895	482	338	(GGGAT)^11	393	Pentanucleotide
HN7TS9H02D2T3B	AAAGGCTCCTCTGGCATCC	60.157	57.895	227	ACCCTCCGTGCCTTTCG	60.005	64.706	544	261	(AATTT)^10	311	Pentanucleotide
HN7TS9H02D3AHS	ACAAGAGGCAGCAAGAAACTC	59.533	47.619	16	CTCAACCACCAGCACTTGG	59.412	57.895	282	170	(ATGTT)^10	220	Pentanucleotide
HN7TS9H02D4030	AAAGGCTCCTCTGGCATCC	60.157	57.895	227	CCCGGCCCTTTGGAATAAAC	59.937	55	589	261	(AATTT)^10	311	Pentanucleotide
HN7TS9H02D4BG8	GACTGCAGCGAACCATGAC	59.94	57.895	130	AGAAAGTCACAGTGTTGCCC	59.077	50	349	261	(AATTT)^10	311	Pentanucleotide
HN7TS9H02D5W7O	GAGCCACAGTTGGAACACC	59.414	57.895	194	CCCTTCATAGCTAGGGACCAG	59.799	57.143	515	290	(CTTTT)^6	320	Pentanucleotide
HN7TS9H02D5X9N	TCGAGACCATTGGAGGCTG	59.856	57.895	220	TGGACTGGATGACTCCTTGG	59.493	55	611	499	(ACTCC)^8	539	Pentanucleotide
HN7TS9H02D63DY	TCCAACGTGCACAAGAAGC	59.716	52.632	34	CTCGACCCTGATCCGTAGG	59.413	63.158	410	203	(ATTTT)^16	283	Pentanucleotide
HN7TS9H02D65MF	GGAACCTCCAGGGTCATCG	60.233	63.158	142	GCTGGGATTGGAATGCTGG	59.631	57.895	442	321	(AGGGG)^7	356	Pentanucleotide
HN7TS9H02D92C9	TGGCTCACAAGCCCAGAAG	60.687	57.895	210	CAGTGAGTTAATGCACAGTAGGG	59.827	47.826	573	353	(ATTTT)^8	393	Pentanucleotide
HN7TS9H02D9LJB	CAGCCTGTGATTGCAGTGG	59.862	57.895	83	TGAACACAGCCTACCCGTC	60.083	57.895	368	139	(GGGCT)^16	219	Pentanucleotide
HN7TS9H02D9PYU	GCAATTTAAAGCACAGCTCCC	59.138	47.619	351	CCTGGGAATATGAATGAAGACTTGG	60.246	44	560	496	(CTTTT)^6	526	Pentanucleotide
HN7TS9H02DA2SI	TTGACAAAGTCCCGCTCCG	61.047	57.895	278	CCGATGAGCATCACTTCGC	59.796	57.895	700	331	(AAATT)^7	366	Pentanucleotide
HN7TS9H02DA5VE	ACCATTGCAGTCCATCAGG	58.177	52.632	25	GCCCTAGCTAAATGTGACCC	58.788	55	252	75	(CTTTT)^11	130	Pentanucleotide
HN7TS9H02DAA3F	TTGACAAAGTCCCGCTCCG	61.047	57.895	278	TGCCCACTCACCCAATGTC	60.689	57.895	646	331	(AAATT)^7	366	Pentanucleotide
HN7TS9H02DAYL3	CGTGCTTAGGAAGGCTTACAG	59.476	52.381	112	GGGTTACGATGACCTAAACGTG	59.823	50	467	306	(GCTTT)^11	361	Pentanucleotide
HN7TS9H02DB09D	ACCTGTTAGAGAAACATCCGC	58.783	47.619	171	ACCTAGTATAATGACAAGCATCGC	59.535	41.667	540	323	(GCTCT)^6	353	Pentanucleotide
HN7TS9H02DC5KJ	TGAGTCACTGGAGCCTACTTG	59.871	52.381	31	TCTCACCTTCTGGAGGCAC	59.396	57.895	292	66	(GATTT)^6	96	Pentanucleotide
HN7TS9H02DEOES	TGCAACCCACTCTGAGACC	60.006	57.895	119	GCAGCAGAACCTCTGAAGAC	59.307	55	503	186	(AAGAT)^7	221	Pentanucleotide
HN7TS9H02DFHLL	GGTAACTTTAATGCTATGTTGGTTCC	59.516	38.462	219	GTTCCATTCAGAGGGACTGC	59.01	55	640	268	(ACCAG)^6	298	Pentanucleotide
HN7TS9H02DG9NN	ACTGGGATGGGAGCAAGTG	60.08	57.895	347	TGACAGTGTTCTGTTCAGCG	59.17	50	710	502	(ATGGT)^8	542	Pentanucleotide
HN7TS9H02DGP1L	TTGCTTTCTAGGCTGCCAC	58.804	52.632	70	CTGCTTATCTCCCACCCATAAG	58.756	50	417	280	(ATTTT)^11	335	Pentanucleotide
HN7TS9H02DHC70	TGGTGGAGACACCTCCTTTG	60.006	55	267	TTCCATTGCTGAGTGAGGC	58.498	52.632	432	304	(GCCCT)^15	379	Pentanucleotide
HN7TS9H02DMGOG	CTGATGGCAGCACCAGTTC	59.565	57.895	52	AGACTTGGCGAAGGTGAGG	60.082	57.895	230	96	(ACACC)^6	126	Pentanucleotide
HN7TS9H02DMO2U	GCAGGTATTTCGCAGGTGG	59.641	57.895	249	TGTTTGCCCTCCTTTGCAC	59.631	52.632	620	493	(GGGCT)^10	543	Pentanucleotide
HN7TS9H02DN4SL	TAGGGACGGTTCACACTGC	60.083	57.895	211	AACTTCCTTTCCCAAATGTCG	57.473	42.857	487	404	(ACAGG)^8	444	Pentanucleotide
HN7TS9H02DNPJN	AGGATGCAGGGACTGTTGC	60.763	57.895	362	CTGATAGCTGGCTTCTGGTAAG	59.034	50	598	399	(AATAG)^10	449	Pentanucleotide
HN7TS9H02DPCUJ	TGTGGGCAGGTAACATGAG	57.802	52.632	378	TCCCTGATCCTTAATCCAATGTC	58.471	43.478	639	457	(CTTTT)^9	502	Pentanucleotide
HN7TS9H02DQLR6	TAGAAGGGTGGCATGTGGC	60.462	57.895	355	CCACACCATTTCACTGGGC	59.783	57.895	600	428	(AGCTC)^10	478	Pentanucleotide
HN7TS9H02DTIDE	CCCATTCCTCCCTACAGGAC	59.64	60	125	CAGCAGTGCACAAGAGTGG	59.79	57.895	497	396	(GGTTT)^8	436	Pentanucleotide
HN7TS9H02DUOA1	CAGTTGGTGTCAGTTCCCAC	59.442	55	216	ATCCGTGAGGAGGACATGC	59.931	57.895	521	426	(GGGAT)^8	466	Pentanucleotide
HN7TS9H02DV64B	AGTGAGGATTTAGAAGTATCACATGG	59.279	38.462	8	TGTTGACAGACCACAGGGC	60.61	57.895	326	62	(AGTTT)^9	107	Pentanucleotide
HN7TS9H02DW2H5	TGCCCTAGGTGTCTTTGCC	60.385	57.895	143	CCCATGCTTTGGTATTACTGTCC	60.137	47.826	492	299	(AATGC)^6	329	Pentanucleotide
HN7TS9H02DWB6K	TGAGTCACTGGAGCCTACTTG	59.871	52.381	31	TCTCACCTTCTGGAGGCAC	59.396	57.895	292	66	(GATTT)^6	96	Pentanucleotide
HN7TS9H02DYZOP	CCCATTCCTCCCTACAGGAC	59.64	60	125	CAGCAGTGCACAAGAGTGG	59.79	57.895	497	396	(GGTTT)^8	436	Pentanucleotide
HN7TS9H02DZKUO	AGCAGCTTTCAAACCACCTTC	60.078	47.619	296	GTGTACGCTTGCAGTCACC	59.868	57.895	592	384	(AGAGC)^10	434	Pentanucleotide
HN7TS9H02EAVX8	GGACTTGCTGTTGACCTCC	58.813	57.895	259	GAGGCTGCTAGGACTGCG	60.629	66.667	523	323	(AAAAT)^11	378	Pentanucleotide
HN7TS9H02EAZRE	CGGCTGCAGAAATGAACCG	60.594	57.895	223	ACTTCTGAGCATATACAATTCTGGC	60.013	40	657	470	(AAAAT)^9	515	Pentanucleotide
HN7TS9H02EBLU3	AAAGGGCACTGTTCGGTGG	61.286	57.895	359	GGACACATTCGTGCAGAGC	59.94	57.895	604	445	(AACTG)^6	475	Pentanucleotide
HN7TS9H02EBOKA	AGGTCCAAGAAGGCCATACC	59.857	55	270	CCAGATTCAAGTTGGCAAAGC	59.069	47.619	525	417	(AACAT)^9	462	Pentanucleotide
HN7TS9H02EBZBN	GTACACCAGGTCAGCAAGC	59.196	57.895	368	TGATGGTTTCAAGGCAGAGC	59.219	50	630	488	(AGAGG)^9	533	Pentanucleotide
HN7TS9H02ECTXA	TTCTGCTTTGAACTGTTGGG	57.21	45	119	AGATGCGCTCTCCACAAG	57.81	55.556	392	307	(ACGCC)^9	352	Pentanucleotide
HN7TS9H02ED497	GGGCACGGAGTGCTTATTG	59.641	57.895	89	GCCCTCAGAGTTCAAAGCC	59.187	57.895	482	388	(AGCCC)^12	448	Pentanucleotide
HN7TS9H02EFDDL	TGCAACCCACTCTGAGACC	60.006	57.895	119	GCAGCAGAACCTCTGAAGAC	59.307	55	502	185	(AAGAT)^7	220	Pentanucleotide
HN7TS9H02EHFW8	ACCAAGCATGTTGAATAAGGAAC	58.376	39.13	125	GATTGACTGCATCGGGCAC	60.012	57.895	508	166	(ATATT)^9	211	Pentanucleotide
HN7TS9H02EHOET	TCTCCACTGAGCAATCATCC	57.764	50	4	TGTCAGGGCGGTTAAGAGG	59.779	57.895	272	79	(CTGTT)^6	109	Pentanucleotide
HN7TS9H02EHW4X	CCCTTTGCTTCCTATTGGGATATTG	60.538	44	21	TTTCGCAAGCAGGAGACTG	58.823	52.632	344	130	(CTGTT)^6	160	Pentanucleotide
HN7TS9H02EI1B5	TTGGCTCTGTGCTTTAGCC	58.804	52.632	170	AGGAGCAGCCAAACATGC	59.057	55.556	439	276	(AGAGC)^11	331	Pentanucleotide
HN7TS9H02EKAG4	GGGTGAATGATTGCCGAGG	59.338	57.895	216	CAGCAGATAGGATGGTAGAGTTTC	59.232	45.833	643	547	(AAATG)^6	577	Pentanucleotide
HN7TS9H02EL4RS	GGGAAGCTCCTACAGTCCC	59.549	63.158	169	ACGGCAGATGCAGGTCAAC	61.421	57.895	500	422	(AAAAT)^9	467	Pentanucleotide
HN7TS9H02EM9XS	CCCTATCCCAGATGCCCAC	60.004	63.158	107	ACCTGGGACCAAAGCTACAG	60.078	55	431	187	(AAAAT)^8	227	Pentanucleotide
HN7TS9H02EMV88	TGTGTCTTCCTGAGGCACC	60.006	57.895	221	GCTGCTTATTAACTACAAAGCCC	58.836	43.478	520	447	(ATATT)^8	487	Pentanucleotide
HN7TS9H02ENHJQ	GTGTCCATGTCTCCACCAAG	58.939	55	123	TCCTCCCACTCTGTTAGGC	58.775	57.895	418	300	(ATTTT)^9	345	Pentanucleotide
HN7TS9H02ENYR7	AGGATGCCAGCATTTGCAC	59.857	52.632	105	GCAAGAGAACAGCGAACCC	59.865	57.895	488	192	(GCAGT)^9	237	Pentanucleotide
HN7TS9H02EO5PC	AAGGCTTCATGTCTGGCAC	58.801	52.632	50	AACCCACCTCTGCGATCTG	60.157	57.895	248	120	(GCTCT)^10	170	Pentanucleotide
HN7TS9H02EORF3	ATGGCGCTGAGATGCTTTC	59.341	52.632	196	ACAAATTTACACCTTGAGAACTCC	58.136	37.5	492	286	(CACTT)^6	316	Pentanucleotide
HN7TS9H02EOXYM	CCTGGAGGTCCCTTCCAAC	60.081	63.158	286	GCCATTTGAACTTTAGGTGGTTTC	59.776	41.667	643	446	(ATTTT)^7	481	Pentanucleotide
HN7TS9H02EP128	ACAGCCTCAGTGGCAAGG	60.323	61.111	28	TCCTCCCACTCTGTTAGGC	58.775	57.895	414	296	(ATTTT)^9	341	Pentanucleotide
HN7TS9H02EPNKA	TGAGTGTGGACCAAGCAGG	60.309	57.895	204	CGAACTTCTCTCAGTGGCG	58.996	57.895	402	277	(AAAAT)^8	317	Pentanucleotide
HN7TS9H02EPREE	TTCAGCGCATGCTGGAAAC	60.158	52.632	122	CTGGGACTGCCTGGTGAAG	60.759	63.158	308	204	(GGGAT)^10	254	Pentanucleotide
HN7TS9H02EQAC4	GATGAAGCCCGAAGTTGGC	59.937	57.895	0	GGGAGACCTCCTCAGTTCC	59.165	63.158	175	43	(GCCTT)^19	138	Pentanucleotide
HN7TS9H02ERRRE	TTCCTCCAGATCCACGAGC	59.553	57.895	56	CGCTGCAAGAGTCGAATGC	60.66	57.895	370	147	(AAACC)^9	192	Pentanucleotide
HN7TS9H02ESAC0	CCCAGGTGGGTTCCTAGC	59.762	66.667	272	AGTACGGAAACCTCGACCC	59.481	57.895	686	623	(ACATT)^7	658	Pentanucleotide
HN7TS9H02ESAPN	TCCTCCACAGCTAAGTACGTG	59.942	52.381	37	AGAAGGCAAAGGTAGACCATC	58.133	47.619	312	78	(ATTTT)^9	123	Pentanucleotide
HN7TS9H02ETF90	TTACCTGCTCCTTGGCTCG	60.157	57.895	224	ACTGGTCTTGAGGCCTTCTG	60.079	55	463	291	(AAACC)^8	331	Pentanucleotide
HN7TS9H02EVC5P	GTGAGAACACCTAGCCTGC	58.597	57.895	37	GCTGGCTTGGAAAGATGGG	59.556	57.895	256	100	(GTTTT)^6	130	Pentanucleotide
HN7TS9H02EWXF5	ACCTGCCCTGGGATCTTTG	60.08	57.895	148	TGCCTGAAGCTGCAATCAC	59.487	52.632	356	260	(AAAAT)^6	290	Pentanucleotide
HN7TS9H03F25HI	TTGGCTTGAGCTGCATTTG	57.845	47.368	135	ACTTCCAACCCAGGTTTACTG	58.547	47.619	416	174	(GGTTT)^11	229	Pentanucleotide
HN7TS9H03F5MCL	GCACCCTGACACTTTGGTG	59.712	57.895	201	CAGCATCTTCCAGCAACCC	59.561	57.895	392	239	(AAAAT)^6	269	Pentanucleotide
HN7TS9H03F67H5	AGAATGTGGCCCTTCTTGC	58.791	52.632	21	GAGGTGCAGCTTCTTACCAAC	59.945	52.381	382	264	(CTTTT)^13	329	Pentanucleotide
HN7TS9H03F6C0Z	ACAGCTATGCTTTGCAGCC	59.561	52.632	10	TGGGTAAGAATAGAAAGTTCAGC	57.039	39.13	406	304	(CCATT)^8	344	Pentanucleotide
HN7TS9H03F6ERL	GGCAGGTACACAAGTGCAG	59.493	57.895	9	CGTCTTGTTTGGGAAGGGC	59.787	57.895	396	95	(ATAGT)^10	145	Pentanucleotide
HN7TS9H03F73PH	CGAACGGCTGGATGGGAC	61.247	66.667	75	TGTGAGAGCCATTGTACAGG	57.99	50	441	178	(AATAT)^8	218	Pentanucleotide
HN7TS9H03F76L8	GGGCAAGTATCTGGCCATC	58.726	57.895	165	TGTCCTCAGCTCCTGCTAAC	59.864	55	485	408	(AAGTG)^6	438	Pentanucleotide
HN7TS9H03F7RFE	TGTCCTCAGCTCCTGCTAAC	59.864	55	261	TACGTAACCTGGCGGCTC	59.852	61.111	632	296	(CACTT)^9	341	Pentanucleotide
HN7TS9H03F85JG	TGAGTGTGGACCAAGCAGG	60.309	57.895	202	CGAACTTCTCTCAGTGGCG	58.996	57.895	399	275	(AAAAT)^6	305	Pentanucleotide
HN7TS9H03F8IN0	ACAAGAGGCAGCAAGAAACTC	59.533	47.619	16	CTCAACCACCAGCACTTGG	59.412	57.895	277	169	(ATGTT)^10	219	Pentanucleotide
HN7TS9H03F8WA6	CTCTACACGGGCTCGTACC	60.011	63.158	155	TAGCAGGTCCCTGTTCTGG	59.083	57.895	596	475	(CATTT)^6	505	Pentanucleotide
HN7TS9H03F9LBW	CGTTGAATTCTTTCCAATCCAGC	59.584	43.478	115	CCACCATTTCCACTGTCCC	58.795	57.895	503	173	(GATAT)^8	213	Pentanucleotide
HN7TS9H03F9LTG	GTTGTCCACCTCCAGGTTTC	59.15	55	49	TGTGACTGAGCATTCCATGAG	58.778	47.619	302	211	(AGATT)^9	256	Pentanucleotide
HN7TS9H03FNJAC	TGTCTCTTGACTTTCAACATTTCAG	58.748	36	7	GCTTGAGGGTGCGTTGAAG	60.158	57.895	168	108	(GGTGT)^6	138	Pentanucleotide
HN7TS9H03FQU5W	TGTACCTGGTCGGAATGGC	60.157	57.895	136	CACACATGCCTCTTGGTGC	60.158	57.895	352	169	(GCTGT)^12	229	Pentanucleotide
HN7TS9H03FS48F	TGACCACCCTAACCGCTTG	60.384	57.895	58	GCTCAGAAACTGGGCTTGAG	59.585	55	256	185	(ATTTT)^7	220	Pentanucleotide
HN7TS9H03FSKK9	CTTCTGGTGTGGAAGAAGGC	59.225	55	47	ACAGGATGCAGCGTAGACC	60.232	57.895	397	85	(CTGTT)^6	115	Pentanucleotide
HN7TS9H03FUBEU	CCTTTCAATATTCTTGCCACAGC	59.332	43.478	8	GGGCAAAGTGTCCGACTTG	59.79	57.895	239	49	(GGCTT)^13	114	Pentanucleotide
HN7TS9H03FUBOE	CCCTGCTTTGACTCCTTGG	58.801	57.895	156	TCAGGGCTACCTGAGCAAC	59.778	57.895	447	194	(GGCCT)^6	224	Pentanucleotide
HN7TS9H03FUR6F	CATTGTGATGCACAGAGGC	57.723	52.632	24	AGCCAAGAGTATTTGCAAGGC	59.941	47.619	314	191	(GGCTT)^6	221	Pentanucleotide
HN7TS9H03FVCWC	GCCATCATTCCTAACCTGGG	58.776	55	116	TACGACAAGCAGGTGCCTC	60.455	57.895	434	153	(AGTTT)^8	193	Pentanucleotide
HN7TS9H03FW1GD	TCACCACAGTCCTGACTCC	59.015	57.895	26	AGCAAGAAACTGGCAACTGG	59.722	50	280	99	(AACAT)^7	134	Pentanucleotide
HN7TS9H03FWWYK	TGAGTCACTGGAGCCTACTTG	59.871	52.381	31	TCTCACCTTCTGGAGGCAC	59.396	57.895	292	66	(GATTT)^6	96	Pentanucleotide
HN7TS9H03FX11K	CTGCACTCTGCCTTGAGAC	58.901	57.895	72	GGAGGTGTCTATGGTGCCC	60.233	63.158	307	118	(AAAAT)^9	163	Pentanucleotide
HN7TS9H03FXW1L	GCAAGAAACTGGCAACTGGG	60.718	55	0	TGCACTTTGCATCACAGCC	60.084	52.632	437	148	(ATGTT)^7	183	Pentanucleotide
HN7TS9H03FY6JB	CTTCTGGTGTGGAAGAAGGC	59.225	55	47	ACAGGATGCAGCGTAGACC	60.232	57.895	397	85	(CTGTT)^6	115	Pentanucleotide
HN7TS9H03FYPH5	ACAGCTCTGCCTAATCAAGAC	58.501	47.619	40	CAAGCTCTGCCTGAACTCC	58.892	57.895	231	130	(CTTTT)^7	165	Pentanucleotide
HN7TS9H03FZJ7N	CCTGCCTCAACTGCCAAAC	60.083	57.895	97	ACCTTTGCTCCTAGCCACC	60.081	57.895	478	193	(AAAGC)^11	248	Pentanucleotide
HN7TS9H03G00FX	TATTGCCCAGGAGAGCCAC	59.851	57.895	246	CACCAGGCACCCAGAAATG	59.482	57.895	478	303	(ATCCC)^6	333	Pentanucleotide
HN7TS9H03G0G9N	ACTGGGATGGGAGCAAGTG	60.08	57.895	347	TGGTAGGATCTGAGTGAAGC	57.109	50	570	501	(ATGGT)^8	541	Pentanucleotide
HN7TS9H03G15K0	TGGGCAACTATTTGGCAATC	57.411	45	65	TGTCCTCAGCTCCTGCTAAC	59.864	55	347	285	(AAGTT)^6	315	Pentanucleotide
HN7TS9H03G2AC2	TTGACAAAGTCCCGCTCCG	61.047	57.895	278	TGCCCACTCACCCAATGTC	60.689	57.895	645	331	(AAATT)^7	366	Pentanucleotide
HN7TS9H03G4NFP	AGTGCTTTAACAACTCCCGC	59.514	50	105	TCCACACTAGCACGTGGAC	60.083	57.895	534	185	(ATTTT)^6	215	Pentanucleotide
HN7TS9H03G4XII	TCCAGCACCTGGCATTTAG	58.182	52.632	53	GGGCAACCAAGGCAGTTTC	60.381	57.895	346	117	(AACAT)^8	157	Pentanucleotide
HN7TS9H03G5HQG	CCTGGGACCCTTCGGTATAG	59.427	60	48	GTACCTGCTCACAATGGTCG	59.381	55	454	93	(AAAGT)^12	153	Pentanucleotide
HN7TS9H03G5SYA	TGACAGAGCAGCGGTATTG	58.3	52.632	320	TCTGCCCAACAAAGTTTCCC	59.356	50	592	469	(ATATC)^7	504	Pentanucleotide
HN7TS9H03G6V11	AGGTAGTGAGCTGTGCAATTAAAG	60.073	41.667	179	TGCCTGCCTGGAGACATC	59.764	61.111	382	215	(ATATT)^9	260	Pentanucleotide
HN7TS9H03G7P7G	TCCCATCCTTGGTCCACTC	59.076	57.895	81	GCCATAGTCAGAAGATGTGCAG	59.884	50	299	203	(ACTCT)^11	258	Pentanucleotide
HN7TS9H03G90R1	ACATAGCTTTGGGAGTGGC	58.181	52.632	55	GCCCACAAGAGGGCTAGG	60.164	66.667	219	138	(CTGTT)^7	173	Pentanucleotide
HN7TS9H03G99C7	CCTTCGGGTATAGGGCAGG	59.702	63.158	152	ACAGTCAGAAGTTGGAAGCTG	58.916	47.619	316	190	(AAAAT)^7	225	Pentanucleotide
HN7TS9H03GCBM6	TCCTCCACAGCTAAGTACGTG	59.942	52.381	37	AGTGCATAGAAGGTCAAAGGTAG	58.681	43.478	318	78	(ATTTT)^9	123	Pentanucleotide
HN7TS9H03GCNOH	CGTTGAATTCTTTCCAATCCAGC	59.584	43.478	115	CCACCATTTCCACTGTCCC	58.795	57.895	505	173	(GATAT)^8	213	Pentanucleotide
HN7TS9H03GDPBD	GCAGAATTATCTGGGTGTTAAGGG	60.193	45.833	21	CCTAAGGGAAGACACAATCAGG	58.89	50	331	209	(AAGGG)^12	269	Pentanucleotide
HN7TS9H03GE7F6	CAGTCAAGCTGCTACCTTCAG	59.405	52.381	44	CCACCAATTGCTTCTGGGC	60.158	57.895	389	148	(ATATT)^12	208	Pentanucleotide
HN7TS9H03GFY23	TCTCAGTAAGGCTGTGGAGC	59.864	55	73	AGGCCTGTTTGCACTTTGG	59.629	52.632	431	126	(AAATG)^8	166	Pentanucleotide
HN7TS9H03GGCAB	GGGACAGGGCAGGATCTTC	60.233	63.158	92	CTTTGAGCCTGGGCCTTTG	59.782	57.895	277	192	(AGCCC)^10	242	Pentanucleotide
HN7TS9H03GIGC2	GGGACAGGGCAGGATCTTC	60.233	63.158	92	CCTGGGCCTTTGGAGTCAG	60.763	63.158	270	192	(AGCCC)^10	242	Pentanucleotide
HN7TS9H03GLJ0E	ACCCATCTTCCCTAGCAACC	59.857	55	39	TGCAAATACCTTCTAGCCTTCAC	59.508	43.478	234	120	(ATTTT)^6	150	Pentanucleotide
HN7TS9H03GMMTL	TGGCAGGAGAAGATGGTGC	60.46	57.895	39	CGATTCACACTTAGGGCAGAC	59.476	52.381	456	207	(GGAGT)^6	237	Pentanucleotide
HN7TS9H03GNIR2	TGACTGGCAGAAGGATGGC	60.46	57.895	99	CAACTAATGCTGGGCGGAC	59.641	57.895	420	246	(CTTTT)^14	316	Pentanucleotide
HN7TS9H03GOIFZ	ACGGCCAATCTTCAAAGCG	59.863	52.632	207	AAGGCCTCCCTTAGCTTGC	60.463	57.895	518	289	(CTGTT)^10	339	Pentanucleotide
HN7TS9H03GPXM3	ACAATCCTTGGCAGGTCCG	60.762	57.895	73	GAACACCCTGTCTGCTTCG	59.202	57.895	334	242	(GGTTT)^6	272	Pentanucleotide
HN7TS9H03GR1S9	AAGCAGGAGGGTCAATCCC	59.771	57.895	127	GCGGGATGCAGAGTTTGG	59.543	61.111	381	285	(AAATG)^7	320	Pentanucleotide
HN7TS9H03GRHR8	TGGACTTGAAACATGTGGCG	59.798	50	104	GCTGCCTGCATTCCCATATC	59.867	55	451	340	(GGCAT)^8	380	Pentanucleotide
HMEZZP203F0DG8	CTACCAGCAGAGCCTTCCC	60.233	63.158	21	GGTCCTTCCCTCCAAGGTG	60.081	63.158	331	95	(ATTT)^6	119	Tetranucleotide
HMEZZP203F1A2C	TGGGCAGGAGAGTTAAGACC	59.495	55	73	CTGGTCATGTGGTGCAGAC	59.194	57.895	347	131	(AAAC)^6	155	Tetranucleotide
HMEZZP203F1OVU	CCTGAGTGCATGTATGCTAAGG	59.622	50	23	ATCTCCGAGTGAGCTGTCC	59.254	57.895	329	161	(ATTT)^6	185	Tetranucleotide
HMEZZP203F2096	AGGGTGAGAATGGAGCTTACC	59.936	52.381	49	AGGGTGGGCTTGTATCCTG	59.462	57.895	251	160	(ATCT)^6	184	Tetranucleotide
HMEZZP203F29P1	GGACAAACTGCTTGCAGGG	60.083	57.895	39	TGCTCCTGGATGTGGAAGC	60.46	57.895	469	211	(AAGG)^12	259	Tetranucleotide
HMEZZP203F2TPH	TCACTACAGCATCATTTGCG	57.267	45	55	CACATTCAAGCAGCTGTTCATAC	59.341	43.478	408	303	(GGAT)^14	359	Tetranucleotide
HMEZZP203F33K9	GAAGCCAGTCCTAGCCCTC	59.931	63.158	198	TGAGCACTCTTGCGCTACG	61.177	57.895	428	287	(AAGC)^6	311	Tetranucleotide
HMEZZP203F3B0J	ACAGGGATTGCAGAAAGGC	58.791	52.632	207	TCAAGACATGCAAGAACCTCC	58.979	47.619	434	355	(AAAT)^8	387	Tetranucleotide
HMEZZP203F56CR	TCACTGTGCAAATTGGGAGC	59.795	50	14	GCACTTAGCCCTAGGCAATC	59.154	55	285	119	(AAGG)^18	191	Tetranucleotide
HMEZZP203F57Y7	CACTGGGCCTCATCTACCC	59.929	63.158	143	TTCTCGTGTGGTCACCTTG	58.066	52.632	374	311	(ATCT)^8	343	Tetranucleotide
HMEZZP203F6FMC	TTCTAAATTCTGTTGCAGTGGG	57.646	40.909	15	TTTGTGCAGGCAGAAGCTC	59.412	52.632	412	59	(AAGG)^6	83	Tetranucleotide
HMEZZP203F7PQ4	TTCTAAATTCTGTTGCAGTGGG	57.646	40.909	15	ATTGTGCAGGCAGAAGCTC	59.185	52.632	398	59	(AAGG)^14	115	Tetranucleotide
HMEZZP203F8RUI	TCTTCCAGGCACTGCTGTC	60.383	57.895	89	TCTGGTTCCCTCTGATGCC	59.467	57.895	351	203	(AATC)^8	235	Tetranucleotide
HMEZZP203F8YFO	TGCTGCACAAAGGTCCAAG	59.333	52.632	235	GCTGTAAACCACCTTGAACAATATAAG	59.803	37.037	472	398	(CATT)^9	434	Tetranucleotide
HMEZZP203F9UHO	GCCTCTAGCTCCAGCCAAC	60.904	63.158	11	CGAAGCTGACTCAAAGCGG	59.941	57.895	177	96	(AGAT)^8	128	Tetranucleotide
HMEZZP203FIFII	AGAAATCTGGGAAGTAGGAAGTC	58.093	43.478	72	ACTACTTGTGCACTGAAGAATCC	59.448	43.478	237	158	(AAAT)^6	182	Tetranucleotide
HMEZZP203FIIP3	TTGTGTTGAAGCACGGCTG	60.011	52.632	138	TCCTAAGACCTTTGAGTATAGGG	57.046	43.478	493	391	(AAAT)^8	423	Tetranucleotide
HMEZZP203FJH6T	CTGCCTCCCAAAGCAGTTC	59.486	57.895	93	CAGGAACATCTGCATGGCTC	59.727	55	269	187	(AAGG)^8	219	Tetranucleotide
HMEZZP203FKDGL	GGGAGTGATGTTGTTTGCCC	60.152	55	39	ACTGCAATGTTCCCTTGGC	59.402	52.632	244	87	(AGAT)^11	131	Tetranucleotide
HMEZZP203FKHN3	ACACTCTGGTGTGGTCTAAGG	59.8	52.381	59	GCTGCCTAGTAGTTTGGAGAAC	59.494	50	324	125	(ATTT)^6	149	Tetranucleotide
HMEZZP203FM6JD	AGTACATGCAGGGTCACATC	58.06	50	49	TCCACATGGAGTAGCATAAGGG	60.074	50	206	90	(ACCT)^9	126	Tetranucleotide
HMEZZP203FMHI9	GGACACTGCTGCTTCCATC	59.267	57.895	201	TTAGCTCCCAAGCTGGGTC	59.775	57.895	438	336	(ATCT)^7	364	Tetranucleotide
HMEZZP203FMRM8	TGCTGTGACCTTTCCTGGG	60.31	57.895	101	TGCCCACCATGCTATCTAGG	59.713	55	298	140	(GGCT)^8	172	Tetranucleotide
HMEZZP203FNVEF	GCAGGTGGATTCTATCAGTATGG	59.195	47.826	21	AAGCACTGAGCAAGAAGGC	59.11	52.632	273	130	(ATCT)^10	170	Tetranucleotide
HMEZZP203FP82Q	GCTCAGACGGAAACAGGAC	58.907	57.895	106	ATGTCCACCTGTGCGATGG	60.833	57.895	300	240	(AAAT)^6	264	Tetranucleotide
HMEZZP203FPXCW	AGACTCATTATGGTTTGCATTCAC	58.568	37.5	22	CAGCTGGCACCAAGCAAAG	60.748	57.895	205	59	(ATCT)^8	91	Tetranucleotide
HMEZZP203FPXQF	TGGGAGAAGTCCAAGCCAG	59.698	57.895	62	GGAGCAGCCACACTTGTTC	59.788	57.895	329	249	(CTGT)^6	273	Tetranucleotide
HMEZZP203FR9WU	TCAGGGTTAGTAGGGCGAC	58.867	57.895	90	CATTGACGATGTCCGACCG	59.436	57.895	318	127	(AAAC)^6	151	Tetranucleotide
HMEZZP203FSDRI	ACTTCTCCGATCTCCACCG	59.257	57.895	14	CCATCTCTGCTTCCACTCAAG	59.126	52.381	177	117	(AAAT)^7	145	Tetranucleotide
HMEZZP203FT8G1	ACAATCTTTCTTAGGTCTTTCAGC	57.959	37.5	11	CCAGGCTGATCTTGCTTACC	59.081	55	300	82	(GGCT)^6	106	Tetranucleotide
HMEZZP203FTH62	CTTTCGCCCTACAACTCCC	58.591	57.895	31	TGAGGCACCTCTGAGACATC	59.574	55	425	103	(GGAT)^10	143	Tetranucleotide
HMEZZP203FTORG	TTGGACCAGAATGGAGCCC	60.08	57.895	83	AACGGGCGAGTTCTACCAC	60.455	57.895	342	158	(ATTT)^7	186	Tetranucleotide
HMEZZP203FTXXI	TCCCAATTGCTGGGACCTC	60.08	57.895	206	GGTCACCTCTGTGCAACTC	58.822	57.895	430	293	(AGAT)^11	337	Tetranucleotide
HMEZZP203FUAD4	GCCCAGAGCCCAATTCGAG	61.571	63.158	174	TGTCCTCACATCACTGCCC	60.081	57.895	395	212	(AAAT)^6	236	Tetranucleotide
HMEZZP203FV48H	AGGAAGCAGGGAATGACCAG	60.151	55	1	AGGCAAGCTGTACAAATACGTC	59.755	45.455	296	90	(AAGG)^11	134	Tetranucleotide
HMEZZP203FV5KB	GGATACGTTCTCTTACGTTGTGC	60.442	47.826	45	TGCTGATAGGTTACACTTTGATG	57.373	39.13	441	115	(CCTT)^6	139	Tetranucleotide
HMEZZP203FV6BY	GCTCAGACGGAAACAGGAC	58.907	57.895	106	ATAGATGTCCCACCTGTGC	57.255	52.632	308	240	(AAAT)^6	264	Tetranucleotide
HMEZZP203FVB4T	AACCTGTCTTTGCCCTCCG	60.686	57.895	11	CAAGCCTGGATAGGAAAGCTC	59.19	52.381	435	221	(ATTT)^6	245	Tetranucleotide
HMEZZP203FVY7X	ATGTTGGAAGGCTAGGTGC	58.181	52.632	15	ACAAAGGCTAAGTTCCATATCCAC	59.585	41.667	219	157	(AAAT)^6	181	Tetranucleotide
HMEZZP203FWE8W	CAGTCTTTGATGACCCTCGC	59.379	55	73	TGTTGACAGAAGCAGTTCCC	58.789	50	300	103	(ACAT)^6	127	Tetranucleotide
HMEZZP203FWQ82	GGAATGACCAGGAAGAAATCAGG	59.822	47.826	9	ACCAATCCAGCACATGTCATAC	59.485	45.455	214	87	(AAGG)^11	131	Tetranucleotide
HMEZZP203FWTWE	CAGGTACCCTGCTGTAGGTC	59.936	60	257	ACCGCCAGTCCTATGCTTG	60.533	57.895	532	454	(AAAC)^6	478	Tetranucleotide
HMEZZP203FWTZA	ACACGTTTGTAGAACCGCC	59.128	52.632	36	CAGCAATTCTGTTTGCAGCC	59.313	50	353	270	(AAAT)^7	298	Tetranucleotide
HMEZZP203FX9HU	GAGCATCTGCAAACACTTCC	58.114	50	12	CTGCTTCTTGTGCACTGGG	59.788	57.895	376	244	(GGTT)^7	272	Tetranucleotide
HMEZZP203FXFUH	GCCACTGCATACTGGGTTG	59.562	57.895	34	CCAAACTGGTTGCCTCTGC	60.083	57.895	322	63	(ATCT)^9	99	Tetranucleotide
HMEZZP203FY8ZX	AGATCCCTCAGTCTCATGTGG	59.379	52.381	40	TCTGAGAGCCTTCTGGCTG	59.475	57.895	194	124	(CATT)^7	152	Tetranucleotide
HMEZZP203FYUH8	ACACCCAAGCTTCCCTATG	57.469	52.632	155	GTTACCTGGACTGTTCTCACC	58.715	52.381	452	380	(ATGT)^8	412	Tetranucleotide
HMEZZP203G1B3F	GTGACCCTGAACACCATGAG	58.939	55	32	TCAAAGCTGTAGTGTCTTGCC	59.262	47.619	314	74	(AATG)^7	102	Tetranucleotide
HMEZZP203G1HZ0	TTTATTGTTGTGACCTGCTCTGG	59.949	43.478	46	CACAGCATTGCGGCACC	60.494	64.706	195	122	(AAAT)^7	150	Tetranucleotide
HMEZZP203G1WXI	CTGAGGCTATGTTGGGATTGC	59.806	52.381	47	CCTTGTCCTTGTCTAGCTTAGATG	59.413	45.833	457	147	(CTTT)^11	191	Tetranucleotide
HMEZZP203G2100	CAGGTACCCTGCTGTAGGTC	59.936	60	257	ACCGCCAGTCCTATGCTTG	60.533	57.895	533	454	(AAAC)^6	478	Tetranucleotide
HMEZZP203G25SL	ACATAGTGTGAAGAGGATTTGC	57.19	40.909	78	GGCATCCAAGATCGGACCC	60.983	63.158	279	143	(ATCT)^13	195	Tetranucleotide
HMEZZP203G2VQH	CAGGTTACGGAACTGCCTTC	59.306	55	23	AGCAGCTATTGGAAGTGGC	58.572	52.632	410	285	(AGAT)^8	317	Tetranucleotide
HMEZZP203G37XL	GGGTTGTTTGTTTCAACCCG	58.814	50	66	TGACTCTTTGGGAGGACACG	60.08	55	247	105	(CTTT)^10	145	Tetranucleotide
HMEZZP203G40NY	TGGTGTAATCCACTCTGGGAC	59.868	52.381	115	GTTCTCATCCAAACCTGAGGAC	59.424	50	279	159	(ACAT)^8	191	Tetranucleotide
HMEZZP203G496U	CACGGTGTGTCCTAGTGGC	61.116	63.158	142	GGGCCTTCGGGTGTAGG	59.752	70.588	299	229	(ATTT)^9	265	Tetranucleotide
HMEZZP203G5DFY	GCACTGCACTCAAATCAGGG	60.223	55	36	AGTATACCAACCCATGCAAGTC	58.885	45.455	253	133	(AAAC)^6	157	Tetranucleotide
HMEZZP203G5QF9	TGGCAGGAGGTCTGGAAAC	60.004	57.895	229	TGTTGTGGTGAAAGGCAGG	58.949	52.632	451	393	(CATT)^7	421	Tetranucleotide
HMEZZP203G60BL	TGGAGGGATCTGTTTGGGC	60.08	57.895	11	TTGTAACCCGCCCTGAGAC	60.082	57.895	163	95	(ATTT)^6	119	Tetranucleotide
HMEZZP203G6OUH	TCTCCAGAAGATGCTGCCC	59.853	57.895	133	TCTGAGGTGCTCCAGAAGG	59.088	57.895	442	167	(ATCT)^10	207	Tetranucleotide
HMEZZP203G6T1U	ATTGTTGTAGCCCACCCTG	58.093	52.632	15	GCAGGTAGACTAATTCTGGTCATC	59.474	45.833	280	64	(AAAT)^10	104	Tetranucleotide
HMEZZP203G9GTJ	ACCTGTCTTGACACCTTTCAG	58.564	47.619	29	AGACTGGGAACGTATGCCG	60.232	57.895	338	98	(AAGG)^19	174	Tetranucleotide
HMEZZP203GAEZT	CTGGCTTCACATTGCACCG	60.524	57.895	29	TTTGGAACGCTGACACAGG	59.042	52.632	297	180	(AGAT)^14	236	Tetranucleotide
HMEZZP203GAM4R	TTTGCCTTTCAGACCCTGC	59.024	52.632	34	CCTTATGGGCCTTCAAAGAGG	59.109	52.381	392	153	(AAAT)^9	189	Tetranucleotide
HMEZZP203GB36L	ATTTGAATATCTGGCTTCTAGGC	57.219	39.13	8	TGGTCACCCGTCAAAGTCC	60.308	57.895	175	82	(ATTT)^6	106	Tetranucleotide
HMEZZP203GB36S	AGGAGTCCATAGCACTCTAGC	59.177	52.381	39	TGGAAGTGTGTGATCATGGC	58.932	50	387	180	(AAGG)^13	232	Tetranucleotide
HMEZZP203GB9Z3	CACATTCAGTTGAAAGCGATGG	59.25	45.455	57	CCGTACTGGCAATTAGCATCC	59.877	52.381	301	169	(AATC)^7	197	Tetranucleotide
HMEZZP203GBPUA	TATGCAGGCATCTCCTTCC	57.33	52.632	44	ACACCTCTCCTGGACATACG	59.286	55	240	169	(ATTT)^6	193	Tetranucleotide
HMEZZP203GBRTK	ACCCACCCTGAGACCTTTG	59.617	57.895	250	AGCACCTGTGAGAGACCTG	59.399	57.895	470	293	(AAAT)^6	317	Tetranucleotide
HMEZZP203GBVCV	TGAAGGGACAGAAATTCATAAGG	57.016	39.13	36	GGTGGTGATATTACGTTACCCG	59.369	50	286	165	(AAGG)^9	201	Tetranucleotide
HMEZZP203GCXZY	CCTGGAGGTCCCTTCCAAC	60.081	63.158	60	TCATACAGGAGCCCAAGAGC	59.934	55	259	113	(AAAT)^8	145	Tetranucleotide
HMEZZP203GEAR1	AGCCCTCCTTTCAAGCACC	60.691	57.895	145	TCTCCAGGAAAGTGTCGCC	60.082	57.895	428	322	(CTTT)^10	362	Tetranucleotide
HMEZZP203GEDYA	TCTTGGACCTCTAGATGAAGGG	59.135	50	4	TGTCTGTTCCACTCCAGCC	60.006	57.895	364	45	(AATG)^7	73	Tetranucleotide
HMEZZP203GEMFV	GAGAGGGTGCCATGAGGTC	60.233	63.158	130	CATCTGTGCCTATTGGTGGC	59.725	55	331	206	(ATTT)^10	246	Tetranucleotide
HMEZZP203GENJT	GCTCAGACGGAAACAGGAC	58.907	57.895	106	ATGTCCACCTGTGCGATGG	60.833	57.895	299	240	(AAAT)^6	264	Tetranucleotide
HMEZZP203GEW6I	ACATGAAGCTGTGGTTGCC	59.407	52.632	127	TTGTAACCCACCCTGGGAC	59.616	57.895	404	319	(ATTT)^8	351	Tetranucleotide
HMEZZP203GEWRM	TCTGGTGGTCCATTGGCTG	60.386	57.895	37	TGGGCATCTGGTAAGGCTC	59.851	57.895	315	209	(AGAT)^11	253	Tetranucleotide
HMEZZP203GEXJJ	GAATGTGGCCTGAGCATCC	59.336	57.895	142	TCCAGGGAAACAATCTGGTC	57.889	50	414	242	(AAGG)^12	290	Tetranucleotide
HMEZZP203GFAQ7	TACGCTGAGACCCACCTTG	59.782	57.895	48	GTGTGGAAAGAGCTTCCGTG	59.872	55	326	103	(GGAT)^9	139	Tetranucleotide
HMEZZP203GFSXF	ACCTGCCCTGAGACCTTTG	60.004	57.895	40	AGCTGTGATGCCGGATTTC	58.962	52.632	427	83	(AAAT)^6	107	Tetranucleotide
HMEZZP203GG0UJ	ACTGCCTTGACTTCTTTGGTG	59.461	47.619	289	GTGACAGTAGAGTCCTTTCAAGTG	59.777	45.833	445	338	(AAGG)^18	410	Tetranucleotide
HMEZZP203GHDEI	GCGGATGATGAATCCAGGTC	59.231	55	92	CCAAGCAGCTCAAAGGCTC	59.861	57.895	408	153	(AAGG)^9	189	Tetranucleotide
HMEZZP203GHW5S	CTACCAGCAGAGCCTTCCC	60.233	63.158	21	TCATTGTAACCCATGCTGAGAC	59.157	45.455	172	95	(ATTT)^6	119	Tetranucleotide
HMEZZP203GHZUX	GGTTACAGGATTTGGGACTTTGG	60.263	47.826	0	GGCTGTGGCAGGCTATTTG	59.934	57.895	242	42	(AGGG)^7	70	Tetranucleotide
HMEZZP203GISC4	CTCAAGCCTCACCTCCCAG	60.157	63.158	44	GCTGTGACATTCTCGTGGC	59.94	57.895	376	129	(ATTT)^8	161	Tetranucleotide
HMEZZP203GJ5PP	ACGGATGGATCAACAGATCAAAG	59.573	43.478	77	ATGGGACATGACTCCCAGC	59.85	57.895	289	156	(GGAT)^10	196	Tetranucleotide
HMEZZP203GJ9SP	TTTGTTGTTTCGACTGACCTC	57.446	42.857	45	AGCAATGGAACCACTAAGTATCC	58.994	43.478	380	97	(AGAT)^9	133	Tetranucleotide
HMEZZP203GJEAK	GTGACCCTGAACACCATGAG	58.939	55	32	TCAAAGCTGTAGTGTCTTGCC	59.262	47.619	314	74	(AATG)^7	102	Tetranucleotide
HMEZZP203GJHP8	CCACTTTCAAGCACTGTTAGGG	60.207	50	54	TCTCAAGGGACCGTGATGC	60.157	57.895	240	157	(AAAT)^10	197	Tetranucleotide
HMEZZP203GK24X	GACCCACCCTGAGTCCTTC	59.777	63.158	112	ACAAATATCAGTGCCTGAAAGGG	59.757	43.478	289	157	(AATG)^9	193	Tetranucleotide
HMEZZP203GKJB7	ACATAGTGTGAAGAGGATTTGC	57.19	40.909	76	ATCCAAGATGGACCCTGCC	59.848	57.895	270	140	(ATCT)^13	192	Tetranucleotide
HMEZZP203GKT2P	TGTTCCATGACCCTAACAAGC	58.975	47.619	0	TCCACTTGTAAGATATGAATTCTCCAG	59.579	37.037	226	81	(AAGG)^19	157	Tetranucleotide
HMEZZP203GL1MK	TGAGACATTCAGGTACAGGGC	60.215	52.381	48	GTTCAGCACATTCTGTCACTTG	58.864	45.455	209	83	(AAAT)^6	107	Tetranucleotide
HMEZZP203GM5VH	CCTGCCCACCTGTATTGAG	58.27	57.895	25	ACGTCACTGAACCTCGGTC	60.084	57.895	358	159	(AGGG)^14	215	Tetranucleotide
HMEZZP203GM6IN	TCTTGGACCTCTAGATGAAGGG	59.135	50	4	AGACGTACCATGGCTGTCC	59.856	57.895	332	45	(AATG)^7	73	Tetranucleotide
HMEZZP203GMJZL	GTGATGGGACACGTGCAAC	60.158	57.895	24	AGATGGCCCTGGAAACCTG	60.08	57.895	323	159	(ATTT)^7	187	Tetranucleotide
HMEZZP203GMK97	AGTATTGTGCAATGCCTTGGG	59.94	47.619	63	ATTTGCTAGAAGCAGCTATGTC	57.335	40.909	283	111	(AAAT)^6	135	Tetranucleotide
HMEZZP203GMZ9B	TGAGACATTCAGGTACAGGGC	60.215	52.381	48	GGCCTCCTTGCCATAATGAAAC	60.664	50	248	83	(AAAT)^6	107	Tetranucleotide
HMEZZP203GNOWT	ATAGATTGAGCCGGAGCCC	59.701	57.895	157	AAGGAGCTGTCTATGGCCG	59.931	57.895	451	299	(ATTT)^6	323	Tetranucleotide
HMEZZP203GNVVL	GAAGATTCTGTCCCGTCACC	58.736	55	4	ATGCTGCAGGTTGAATGCG	60.232	52.632	401	194	(CTTT)^12	242	Tetranucleotide
HMEZZP203GO4JJ	AGCCAATACAAGCAGTGAGG	58.639	50	71	TGCATAGAGGATAATGTAACTCTGG	58.782	40	492	415	(AAGG)^6	439	Tetranucleotide
HMEZZP203GO908	CCACTGGCCACCCTTACTC	60.46	63.158	34	TGTTGCAAGCTGTTTGAATTGG	59.56	40.909	428	164	(AAAT)^7	192	Tetranucleotide
HMEZZP203GORU5	GCTCAGACGGAAACAGGAC	58.907	57.895	106	ATGTCCACCTGTGCGATGG	60.833	57.895	298	240	(AAAT)^6	264	Tetranucleotide
HMEZZP203GQSTJ	CCTGAGTGCATGTATGCTAAGG	59.622	50	23	ATCTCCGAGTGAGCTGTCC	59.254	57.895	330	161	(ATTT)^6	185	Tetranucleotide
HMEZZP203GR69H	CGGGATGGTACCGGGAATG	60.681	63.158	68	AACCCACCCTGAGACCTTG	59.617	57.895	345	274	(ATTT)^6	298	Tetranucleotide
HMEZZP203GR6FH	TCACCTTGGTTGTTCTGGG	57.942	52.632	43	CTCCAAATCTCCTGATAACCTCC	58.807	47.826	409	331	(AGAT)^11	375	Tetranucleotide
HMEZZP203GRGXP	AACCTGTCTTTGCCCTCCG	60.686	57.895	11	TCAAGCCTAGGATAGGAAGCTC	59.542	50	432	219	(ATTT)^6	243	Tetranucleotide
HMEZZP203GS6E4	CCTGAAAGGCCAAATCATCCC	60.008	52.381	170	GATGTGCCTGATTGCACCC	59.934	57.895	389	230	(ACAT)^6	254	Tetranucleotide
HMEZZP203GS6P4	CCAGCTGCAGGAAATGCTC	59.935	57.895	13	CCGTGACACTGAAGATCCTG	58.742	55	165	42	(ATGT)^7	70	Tetranucleotide
HMEZZP203GTCUP	TTGTTGTGACCTGCCTGGG	60.916	57.895	198	TCACTATGGTTGCAATGCGG	59.656	50	395	251	(ATCT)^14	307	Tetranucleotide
HMEZZP203GTE03	CAGACCATAGGCACTGCAAC	59.658	55	4	AGTCTTGCACAGAAGCAATC	57.092	45	163	81	(ATTT)^6	105	Tetranucleotide
HMEZZP203GTKVT	GCTTGAAGACAGATTTATGAATGGC	59.787	40	72	CACCTGGATCAACTTGGACG	59.304	55	363	138	(ATCT)^10	178	Tetranucleotide
HMEZZP203GUSTI	CGCAAGTTGGGAGAATGGC	60.232	57.895	7	AATATTGCAGGGATGTTGGC	57.183	45	282	186	(AAAT)^6	210	Tetranucleotide
HMEZZP203GW1GQ	TGGTGTAATCCACTCTGGGAC	59.868	52.381	115	AGTCTTAGTTCTCATCCAAACCTG	58.978	41.667	286	159	(ACAT)^8	191	Tetranucleotide
HMEZZP203GXY21	TACGCTGAGACCCACCTTG	59.782	57.895	48	GTGTGGAAAGAGCTTCAGCC	59.87	55	496	103	(GGAT)^9	139	Tetranucleotide
HMEZZP203GXZQN	AGACTCATTATGGTTTGCATTCAC	58.568	37.5	22	GCACCCTTCAATTTGGCTTG	58.948	50	403	59	(ATCT)^8	91	Tetranucleotide
HMEZZP203GYS45	GCTGTGCCACCAAAGTCAG	60.084	57.895	64	TCCCTGTACTTGCAACCTATG	58.139	47.619	213	153	(AATC)^7	181	Tetranucleotide
HMEZZP203HA51M	GTTGCAGGACATTCCACCTG	59.868	55	39	GCCAGCTAATGCCAGAACG	60.012	57.895	418	224	(CTTT)^11	268	Tetranucleotide
HMEZZP203HAY1E	CCAAACCAGGAAGTCGTGC	59.79	57.895	28	GGCAAGCAGACCTGGAAAG	59.486	57.895	342	110	(ATTT)^7	138	Tetranucleotide
HMEZZP203HBEFX	CTTCTAACTCACATCCCTATAAACAAG	58.456	37.037	18	TCAGGAGCCACAGAGTTGG	59.701	57.895	459	56	(ATTT)^6	80	Tetranucleotide
HMEZZP203HBT7V	AGACTTCAAGCTCAGAGAACC	58.085	47.619	100	TGCTTAAATTTGAAAGTGATGGGC	59.532	37.5	307	249	(ATTT)^6	273	Tetranucleotide
HMEZZP203HCHWB	AGAACTTTCGACACAGCAGG	58.877	50	53	TGACCTGAAGGGCAGCTTG	60.687	57.895	209	133	(CATT)^7	161	Tetranucleotide
HMEZZP203HDJHL	CCCTGCCAAGAAGCATTATC	57.291	50	77	ACCCAATGCAAGAAACGGC	60.083	52.632	253	135	(CTTT)^14	191	Tetranucleotide
HMEZZP203HDLA2	ACATCTGCTCTAAAGTGTGCC	59.054	47.619	3	GCCCAGCTGCTTGTTGG	59.677	64.706	269	207	(AAAT)^8	239	Tetranucleotide
HMEZZP203HDZLZ	CCTGTGACCAGGGATGGTG	60.46	63.158	8	AACCTTCAGGTATAGAGCAGG	57.288	47.619	315	255	(GATT)^7	283	Tetranucleotide
HMEZZP203HFJ6X	TCCTCCCACTGTTGTTTCC	57.634	52.632	152	TTGTCAGCAACTCCCAGGC	60.987	57.895	359	234	(AGAT)^17	302	Tetranucleotide
HMEZZP203HG8MN	ACCAGGAAGTGGAAAGAGCC	60.37	55	23	CAACCCGACGTACCGTTAG	58.706	57.895	224	157	(AAAT)^6	181	Tetranucleotide
HMEZZP203HGERE	TCTAAGCTAGTTATAGCAGTCCC	57.469	43.478	96	GTTGTAACCTGCCCTAAGACC	59.052	52.381	249	178	(ATTT)^8	210	Tetranucleotide
HMEZZP203HGLT1	CTAAGTGGCAATTGGGCAGG	59.937	55	13	TGCTCTATGGATGGCAAAGC	59.074	50	305	77	(AAGG)^13	129	Tetranucleotide
HMEZZP203HGYTX	AGGCAGCTAGTTGGATGGG	59.85	57.895	20	TAGTGAGGAACAGGTCGGC	59.48	57.895	188	94	(AAAT)^6	118	Tetranucleotide
HMEZZP203HHAIM	TGCTGTATGAGTTCTTTATAGATGG	57.272	36	33	TGAGTCGTTCCCGTGAAGTAG	60.214	52.381	330	69	(CATT)^7	97	Tetranucleotide
HN7TS9H02C06AT	ATCCAGCTCCAAGGATGGC	60.234	57.895	270	TGTCAATGCACTCAAGAACTCC	59.62	45.455	425	318	(AGGG)^7	346	Tetranucleotide
HN7TS9H02C09AF	CTGCATGGCAGTAGAGTCC	58.368	57.895	263	TCCCTGGCTTCAAGTTCCC	60.003	57.895	447	303	(CTTT)^15	363	Tetranucleotide
HN7TS9H02C0DRS	AGGCCCAGTGAAGACATGG	60.08	57.895	262	TGACTCTCAGTTGTGGGAC	57.051	52.632	539	476	(ATCT)^6	500	Tetranucleotide
HN7TS9H02C0JZ1	GGCGTGTCCGAAGAACAG	59.171	61.111	63	GCAGGACCGTAAGTTTGGC	59.864	57.895	341	205	(CTTT)^16	269	Tetranucleotide
HN7TS9H02C0NAJ	TCAGCCAGAGCAAGCATTC	58.885	52.632	46	CCAGCCCATTTCTGGCAAC	60.158	57.895	375	144	(AGAT)^11	188	Tetranucleotide
HN7TS9H02C0S5A	TTGTAACCCGCCCTGAGAC	60.082	57.895	249	TTGGGCCTTTATGGTCATTTC	57.23	42.857	523	313	(ACAT)^6	337	Tetranucleotide
HN7TS9H02C0VXX	GTCTGCCACAAGAGTTCACC	59.516	55	4	CCAGCTCGTTCCTGTATTTGC	60.348	52.381	243	137	(CTTT)^18	209	Tetranucleotide
HN7TS9H02C103S	CTGAAGTGGTCAACATCCAGC	59.944	52.381	86	AGGAAACATGGTTACAAGAGTAGC	59.528	41.667	355	264	(CATT)^7	292	Tetranucleotide
HN7TS9H02C12MN	TTCTAGTGGGCCTTGCTGG	60.081	57.895	283	GCAGTTAAGAAATTTATCCGTTGGG	59.73	40	590	465	(ATTT)^10	505	Tetranucleotide
HN7TS9H02C1F75	ACATCTGCCTTGTTTCAATACG	58.069	40.909	0	TGGCAACTCACTGTCAGCC	60.982	57.895	428	61	(CTTT)^17	129	Tetranucleotide
HN7TS9H02C1OCS	TTGCCCAAGCCTTTGATGC	60.082	52.632	223	CAGTTACTACTGCAGAGGTGC	59.137	52.381	562	388	(AAAT)^6	412	Tetranucleotide
HN7TS9H02C1PK9	ACCCAGAATAGGCATGAGGTC	60.006	52.381	24	CAGGTTCGTCGGCATTCAC	59.941	57.895	438	83	(ATTT)^8	115	Tetranucleotide
HN7TS9H02C1QGN	GCAGGGCAGCTTACAATGC	60.6	57.895	51	AGTCACTTTGCAATTGTCTTTCC	58.826	39.13	385	260	(ATCT)^11	304	Tetranucleotide
HN7TS9H02C1R0L	TGGATTGAAGGAGGCCCAG	59.771	57.895	45	AGCTTGACACTCTGCTCCG	60.455	57.895	363	136	(ATTT)^8	168	Tetranucleotide
HN7TS9H02C2393	TGGTCGCCCTTCTCTGAAC	60.082	57.895	215	AGCTCATTCTCGACAGATAGTC	57.928	45.455	632	544	(AGAT)^12	592	Tetranucleotide
HN7TS9H02C246H	TGCTTGCATCTGTCTTGGG	58.802	52.632	257	GACCTTGGGTCCTACCTCTG	59.571	60	534	385	(ATTT)^7	413	Tetranucleotide
HN7TS9H02C24TI	AGCAGTTCCAAGGTGAGCC	60.688	57.895	338	TGAGAGACTTCAGAGTTCTAGCC	59.759	47.826	596	474	(AAAT)^8	506	Tetranucleotide
HN7TS9H02C27AI	AGGCCCTTAGATCCAAATGTAG	58.065	45.455	71	ACACTGAAATGGACAGCAAGC	60.147	47.619	314	226	(CTTT)^8	258	Tetranucleotide
HN7TS9H02C281H	CACAGTCAGCAGATTGCCC	59.565	57.895	59	CCCACATTGGCTGCACATC	60.232	57.895	339	164	(AATG)^11	208	Tetranucleotide
HN7TS9H02C2FEV	AAGGGAAGCAACAGCTTGG	59.02	52.632	140	GTAACCCGCCCTGAGACC	60.164	66.667	415	345	(ATTT)^6	369	Tetranucleotide
HN7TS9H02C2I7K	CTCTCACACAACTATCTGATGC	57.369	45.455	242	GCCTACAGCCAAACTACATGG	59.739	52.381	651	519	(CAGT)^9	555	Tetranucleotide
HN7TS9H02C2JXV	GCACATCCCTAATTTCTCGGG	59.535	52.381	46	TGTCCGCTTCCGTTACCAG	60.455	57.895	203	123	(AAAT)^6	147	Tetranucleotide
HN7TS9H02C2LCU	GAGCACCTGACCACAAAGC	59.788	57.895	229	AACCTGACAGAGGGCAACG	60.683	57.895	594	467	(AGAT)^6	491	Tetranucleotide
HN7TS9H02C2ZJ4	TGCATCTCCTTAGCACCCTG	60.224	55	235	TCAAACGTCAGCATGTCTCC	58.95	50	568	421	(ATCT)^10	461	Tetranucleotide
HN7TS9H02C32SM	TGTGATGAACCCAGGAGCC	60.081	57.895	11	CTGCACCAGCTACCATTGC	59.936	57.895	430	191	(AAGG)^15	251	Tetranucleotide
HN7TS9H02C352I	TCACACTGGGACCTTTGGG	59.927	57.895	114	CCATCTGGTTGCAGCCTTTC	60.223	55	426	161	(AAAT)^6	185	Tetranucleotide
HN7TS9H02C37VE	TGGCCTTTGGCTGAGGAAG	60.691	57.895	28	TGTGGCAGGTCTACAATGC	58.503	52.632	437	153	(AAAT)^8	185	Tetranucleotide
HN7TS9H02C386K	TCTTCAGAGTATGCATCAGGG	57.654	47.619	46	GCAATGCAGCCTTTCAACC	58.905	52.632	388	129	(AGGG)^9	165	Tetranucleotide
HN7TS9H02C389L	TGTGCTCAGGAATTATGGAGTG	58.89	45.455	376	TGTCCTGCCAAGGTGGATG	60.386	57.895	571	433	(ATTT)^7	461	Tetranucleotide
HN7TS9H02C3BQO	CACAACCAGCCCACTTCTG	59.412	57.895	204	TACGTGGATCCTGCCGATG	60.009	57.895	635	525	(AAAT)^6	549	Tetranucleotide
HN7TS9H02C3EGU	TGTGACCTGCTGTGAAGCC	60.982	57.895	94	CACAGTTGCACACTTCTGGG	60.082	55	386	129	(AAAT)^6	153	Tetranucleotide
HN7TS9H02C3WG2	TCCATCCAAAGCATTGCGG	59.559	52.632	98	CCTGGTGTCACGGAACTTG	59.123	57.895	495	271	(ATTT)^6	295	Tetranucleotide
HN7TS9H02C3ZMB	TATGGTCCCGGGTTGCTTC	60.157	57.895	166	ACCATATCCCTGCAGTTCCC	59.931	55	351	275	(AAGG)^11	319	Tetranucleotide
HN7TS9H02C41ZS	ACTTCCCGGTGGAGAATGG	59.775	57.895	270	GCAGACTCCCTCAGAGCC	59.848	66.667	475	392	(GTTT)^6	416	Tetranucleotide
HN7TS9H02C43R4	CACCACACTTCTCAGCATAGG	59.129	52.381	74	ACAAACTGTGTTCAGACGCC	59.73	50	410	127	(AAGG)^16	191	Tetranucleotide
HN7TS9H02C45DY	CGCAACTTGTCCTGCTCAC	60.158	57.895	6	CCCAGTGGAGGTACACCAG	59.778	63.158	390	147	(ATTT)^11	191	Tetranucleotide
HN7TS9H02C4BSU	TCCCAAATGTGTCCTCTGC	58.107	52.632	152	AGCCAAGAGGTACAGCTTCC	60.151	55	422	263	(AGGG)^6	287	Tetranucleotide
HN7TS9H02C4CJD	CAATGGGTTTGGTGGGCTC	59.781	57.895	106	TGCATCTGTTCCCATGCAG	58.877	52.632	324	149	(AGGG)^16	213	Tetranucleotide
HN7TS9H02C4E8G	CCTGCAGCATTCACACCTG	59.862	57.895	148	CATTGCTGCCAGTACGACC	59.645	57.895	548	428	(ACAT)^6	452	Tetranucleotide
HN7TS9H02C4K33	GATGCAGGTTTCAGGGCAC	59.86	57.895	380	TGCTGCAGTTTCATTAAGGTC	57.558	42.857	664	539	(CTTT)^7	567	Tetranucleotide
HN7TS9H02C4LI6	ACTGAAGGATAGGGCTGGTC	59.272	55	0	TTCACCACTGAAGCCAGGG	60.31	57.895	345	38	(ATCT)^13	90	Tetranucleotide
HN7TS9H02C4LVS	TTTCTTTCCCGCCACATGC	59.785	52.632	6	CTCCTCACGTTGCGGTTTG	60.158	57.895	231	65	(AGAT)^6	89	Tetranucleotide
HN7TS9H02C4O2O	GCAGCAAGTGTGTCTTCCC	59.788	57.895	82	GACTCTTCTGCCCATCAGC	58.667	57.895	463	303	(ATCT)^9	339	Tetranucleotide
HN7TS9H02C4QC4	GGATTTCCGATCTATCAGTTTGGG	60.013	45.833	29	TGCCTTTGGTTGGCATGAG	59.402	52.632	467	74	(CATT)^6	98	Tetranucleotide
HN7TS9H02C4R6V	GTGAGCCTTGCAGGATTGG	59.561	57.895	102	CCCTTTAATTGCCTCTTGTTAACTG	59.38	40	404	204	(ATCC)^6	228	Tetranucleotide
HN7TS9H02C4U6N	CGGAAATGAGCTGCCAAGG	59.936	57.895	432	TGAACATGCGGGCTTTACC	59.186	52.632	727	630	(AATT)^6	654	Tetranucleotide
HN7TS9H02C4X17	TCTGGAATGCTGGTAGCCC	59.851	57.895	293	TCTGGCTGGTTTGCTTCAC	59.031	52.632	593	451	(AAAT)^7	479	Tetranucleotide
HN7TS9H02C52JZ	TTCTGAGTGTGGTCCTGCC	60.006	57.895	446	ACCAATGAGTCTGTATAGGTACCAG	60.187	44	719	619	(ATTT)^6	643	Tetranucleotide
HN7TS9H02C54TP	TCTCTGCCCTGCATCCTAC	59.242	57.895	15	TAAACCTGAGCTTGGGCAG	58.107	52.632	424	129	(CTTT)^13	181	Tetranucleotide
HN7TS9H02C553A	ACAGAAGAAACAGGTTTGCC	57.208	45	27	AGAACAGCTCTGGATGCCC	60.157	57.895	459	115	(AAAT)^7	143	Tetranucleotide
HN7TS9H02C55V0	AGCATTGAGCACATTAGGGC	59.362	50	89	TTGTAACCCGCCCTGAGAC	60.082	57.895	335	266	(ATTT)^6	290	Tetranucleotide
HN7TS9H02C5NA8	GCTCTTGGGAGAATCCAACC	59.002	55	27	TGAGGGTGATGGCATTGTTTC	59.596	47.619	470	198	(CTTT)^6	222	Tetranucleotide
HN7TS9H02C5QWK	AGTGGCAGACCCACTTCTG	60.005	57.895	180	ACCTGCCCTGAGACCTTTG	60.004	57.895	568	500	(ATTT)^7	528	Tetranucleotide
HN7TS9H02C5RKR	TCATATCTGGGAGGATCATGGG	59.33	50	22	AGTGCAGACTCGAACTGGG	60.083	57.895	378	84	(GTTT)^6	108	Tetranucleotide
HN7TS9H02C5VWX	GGAGATACCTCTGGAGCCC	59.011	63.158	267	GCCTTATTGTACCTACACCTTGG	59.572	47.826	583	438	(AGGG)^8	470	Tetranucleotide
HN7TS9H02C5XB2	ACGACAACAAGGCCAATGC	60.084	52.632	9	TCCCTCTAGACAAGCCTGC	59.166	57.895	453	125	(AGAT)^10	165	Tetranucleotide
HN7TS9H02C6011	ACACTATTGGGATTTCTTACATAGG	57.183	36	78	TGTCTTGCCTCTGCTACCC	59.778	57.895	527	255	(AAAT)^7	283	Tetranucleotide
HN7TS9H02C60DH	ACATTGCCACTTGCCAGAC	59.407	52.632	38	GCAACAATGCTGGGTCTCC	59.86	57.895	412	76	(ATTT)^7	104	Tetranucleotide
HN7TS9H02C6DPJ	GTGCTCTTTGTAGGAGAGCTG	59.134	52.381	150	ATCCATTCCCAGCCAGAGC	60.234	57.895	346	193	(AACC)^7	221	Tetranucleotide
HN7TS9H02C6K8R	AGATTGCCACATCCCTGCC	60.844	57.895	411	GAGCGCGTGCTACTTTACG	60.088	57.895	569	482	(AATG)^6	506	Tetranucleotide
HN7TS9H02C6NA7	ACAGGTCAACTTCAGCCAC	58.348	52.632	31	AGTGTCCCTTCTGAGGTGC	59.701	57.895	341	90	(CATT)^8	122	Tetranucleotide
HN7TS9H02C6NMF	GTGGGTACATAGGTGTGGC	58.279	57.895	36	GCAAGTTCTGGTGCCAAGG	60.083	57.895	420	228	(AAGG)^15	288	Tetranucleotide
HN7TS9H02C6RS4	TCAGCCAGAGCAAGCATTC	58.885	52.632	46	CCAGCCCATTTCTGGCAAC	60.158	57.895	373	144	(AGAT)^11	188	Tetranucleotide
HN7TS9H02C6WPO	ACATGGCCCTGAAAGTGGG	60.694	57.895	108	ACATGGTTACAGAGTTGCATTC	57.724	40.909	547	466	(CATT)^7	494	Tetranucleotide
HN7TS9H02C6YOE	TGCTCATTGTTGAGCTTGGC	60.152	50	193	TCCCTACTGCTCAAAGTGC	57.817	52.632	615	323	(ATCT)^14	379	Tetranucleotide
HN7TS9H02C749J	TTGCCATTTCTCAGTGCCG	59.488	52.632	46	AGTACCAAACACCTCAATTCCC	59.012	45.455	348	205	(AAGG)^11	249	Tetranucleotide
HN7TS9H02C79AM	ACCTGCCCTAATACCTTCAG	57.069	50	85	TTCTCCCACTCTTGCAGGG	59.698	57.895	455	127	(AAAT)^8	159	Tetranucleotide
HN7TS9H02C7IV5	CTGGCAGTTACGATGTGAGC	59.735	55	189	AGACTCAGGAAATGCTGGC	58.189	52.632	447	221	(CTTT)^8	253	Tetranucleotide
HN7TS9H02C7J2T	TCTCTGCCCTGCATCCTAC	59.242	57.895	15	TAAACCTGAGCTTGGGCAG	58.107	52.632	424	129	(CTTT)^13	181	Tetranucleotide
HN7TS9H02C7KR9	GGGAGTATCTCTGGCCTGC	60.006	63.158	237	TGGGTTCACCAGGGAATGG	60.002	57.895	509	418	(ATTT)^8	450	Tetranucleotide
HN7TS9H02C7NQU	GGTGAGCCTTGCAGGATTG	59.561	57.895	86	TGCAGCTCTAACCAGTCGG	60.158	57.895	481	189	(ATCC)^6	213	Tetranucleotide
HN7TS9H02C7OI1	ACCTCTTCTGACCTTTGGC	57.718	52.632	201	TCCTTGGTGTTGGCTATGC	58.492	52.632	627	355	(AAGG)^15	415	Tetranucleotide
HN7TS9H02C7Q3X	GGGCATTCCTGGTTACCTTC	58.997	55	120	TGAGGGTGCCTATTGCCAG	60.157	57.895	528	163	(ATTT)^10	203	Tetranucleotide
HN7TS9H02C7YTQ	TGTTTGTGGCACTGAGGTTC	59.366	50	85	CAGCCCACAGCTATTGCAC	59.936	57.895	257	166	(AAAT)^6	190	Tetranucleotide
HN7TS9H02C839H	GCAGCACTCTAACCATGATCTAC	59.704	47.826	87	CACATGTATACTCCTTTCCTGAGC	59.714	45.833	253	178	(AATG)^6	202	Tetranucleotide
HN7TS9H02C83MS	AGGATGGACCTCTGACTGC	59.163	57.895	192	TGACTGTCCAAGCAGGTGG	60.309	57.895	545	279	(CTTT)^15	339	Tetranucleotide
HN7TS9H02C85V9	GGGAGTGCAGGTTGACTAGG	60.51	60	159	CAGTGGGCACACGGGATAG	60.902	63.158	521	228	(ATTT)^6	252	Tetranucleotide
HN7TS9H02C8BN1	TTGCCTTGGATTGGGACAG	58.4	52.632	388	ACATCTGCTACTGTCGGGC	60.232	57.895	650	499	(AGAT)^9	535	Tetranucleotide
HN7TS9H02C8BYO	GCCACTGGTGCTTTCTTGG	60.083	57.895	9	TGCAGGCTATTTGCTCGAC	58.973	52.632	170	60	(AAGC)^6	84	Tetranucleotide
HN7TS9H02C8NA6	GTTGCTGCTCCCTAATAGCC	59.154	55	144	TGGACCAGAACGTCCATCC	59.779	57.895	541	276	(CTTT)^11	320	Tetranucleotide
HN7TS9H02C8P75	AATTCTGGGACAGGGTGGC	60.387	57.895	211	TCGGTCTGACATCTGGAGC	59.558	57.895	619	556	(ACTG)^8	588	Tetranucleotide
HN7TS9H02C8PKM	TCTCCGCGTTCCTTATGGG	59.932	57.895	36	TGTCTGTGACAACCAGAGGTC	60.352	52.381	361	283	(AGGT)^6	307	Tetranucleotide
HN7TS9H02C8S4N	AGAAAGTGCAGATGTGCCATTAG	60.075	43.478	122	AGGAATGGAGGCCCTGTTG	60.08	57.895	532	327	(AAGG)^13	379	Tetranucleotide
HN7TS9H02C8VZY	TTGTGCTGCGTAAGCAAGG	59.79	52.632	60	AGAGGGAGGACACTTTAGAAC	57.149	47.619	354	129	(AAGG)^6	153	Tetranucleotide
HN7TS9H02C94AN	ATTCATGCCACCCATCTGC	58.942	52.632	48	TTCTGGGACACATCCTGCC	60.081	57.895	475	256	(AAAT)^6	280	Tetranucleotide
HN7TS9H02C9LJS	TGTTCACAGTGCAAGATGCC	59.797	50	97	TTCTCCTCAGTGCTTGCCC	60.385	57.895	290	175	(AGAT)^10	215	Tetranucleotide
HN7TS9H02C9MLB	GCCTTTCTGGAAATTGAATGGG	58.898	45.455	4	AGGGTCTTCTCAACAGCCG	60.082	57.895	408	69	(ATCT)^10	109	Tetranucleotide
HN7TS9H02C9N0Z	GTTGCCAGGCTTTGAGGTG	60.083	57.895	120	ATGGAGGCAATATCCCGAG	57.097	52.632	514	366	(AAGG)^19	442	Tetranucleotide
HN7TS9H02C9UGY	CCCTTCATTCATGTCACCAAG	57.619	47.619	251	AGGGACCAGAAATAATTGGAAATGG	60.128	40	563	317	(CTTT)^12	365	Tetranucleotide
HN7TS9H02C9WFH	TAGGCGGACAGGACTTTGG	59.779	57.895	286	CTCTGTGCCTTGGAGATTGC	59.656	55	637	477	(AGAT)^11	521	Tetranucleotide
HN7TS9H02C9XR6	AGTTCCATTGCTGGAGAAGC	58.928	50	113	CAGCCAGGGACTGATCCAC	60.534	63.158	496	207	(AAAT)^6	231	Tetranucleotide
HN7TS9H02CWOF1	AAGTGGCTAGGAAGCAGGG	59.774	57.895	97	TGGCGCAGTATTCCATTGTC	59.371	50	249	168	(GGTT)^8	200	Tetranucleotide
HN7TS9H02CX9L8	ATCTGTGAAGAGGTTCAAGAGC	58.829	45.455	48	CCTCTAGATGGAAGGTAGACCC	59.275	54.545	391	209	(GGAT)^6	233	Tetranucleotide
HN7TS9H02CXAV6	AACCTGCTCTGAGACCGC	60.085	61.111	371	CTCTCTGGTGCATGGGAGC	60.906	63.158	585	411	(AAAT)^7	439	Tetranucleotide
HN7TS9H02CXNGH	TCTGAGGCATGTCAAAGACC	58.279	50	9	GGTGCTCGGATTTCAAGGC	59.937	57.895	351	97	(ACAT)^7	125	Tetranucleotide
HN7TS9H02CY1VG	AGCTTGGGACCAGTTTACC	57.708	52.632	180	TCTTTGGTGCAGAGCCCAG	60.687	57.895	419	249	(AAGG)^16	313	Tetranucleotide
HN7TS9H02CY29S	AAGACGGTGCTGTTCAGGC	61.346	57.895	5	CCAGTGGAAAGCGGAAATG	57.64	52.632	321	212	(AAAT)^9	248	Tetranucleotide
HN7TS9H02CY5XT	CCCATGGAGTCATTAGGGAGC	60.699	57.143	30	TGCCAACTGTGGATGATTGG	59.214	50	475	119	(ATTT)^8	151	Tetranucleotide
HN7TS9H02CY7ZL	CACTGTTCCACACCTCTGC	59.12	57.895	143	ACATGAATTCGAGACTTGAGACC	59.264	43.478	430	229	(CTTT)^16	293	Tetranucleotide
HN7TS9H02CYF9X	ACCACGACAAGGGAATCGG	60.457	57.895	174	GACTTGTGCCAGGATGCAG	59.565	57.895	618	296	(ATCT)^7	324	Tetranucleotide
HN7TS9H02CYPMK	AGAATGCTGCAGAACGGAG	58.594	52.632	134	TCCATGTGCTAATGCAGGC	58.954	52.632	481	278	(ATTT)^9	314	Tetranucleotide
HN7TS9H02CZG9C	ACCAAGAAACATGGCAGCG	59.786	52.632	159	CAACCAGGTGCATTGAGGG	59.482	57.895	515	392	(GGAT)^6	416	Tetranucleotide
HN7TS9H02CZK6F	GCTGCGTGTTCACGTTTCC	61.09	57.895	91	CACCGCTGTGCTGATTGG	59.856	61.111	435	193	(ATTT)^6	217	Tetranucleotide
HN7TS9H02CZL98	AAGCACTTTGCCTCCAACC	59.326	52.632	357	TCTTCTGGGCTTTCTTTAGCAAC	59.949	43.478	727	619	(ATTT)^7	647	Tetranucleotide
HN7TS9H02CZOVE	ACTGGGCTAGTAAGTTCCATTC	58.283	45.455	28	CCTTAGTTTCCTAGAGTCCATGC	59.069	47.826	249	175	(ATCC)^9	211	Tetranucleotide
HN7TS9H02CZQSJ	ACTGTGGTAACCTGCCCTC	59.699	57.895	173	TGTTCTCCATTGCACCAAGC	59.795	50	411	225	(AAAT)^6	249	Tetranucleotide
HN7TS9H02CZYTC	GAGACTTCTGGGAGTTTGCC	58.939	55	150	TTTGCCACCATCGTTTGGG	59.707	52.632	501	182	(AGGG)^11	226	Tetranucleotide
HN7TS9H02CZZL2	AGCATTGAGCACATTAGGGC	59.362	50	89	TTGTAACCCGCCCTGAGAC	60.082	57.895	337	266	(ATTT)^6	290	Tetranucleotide
HN7TS9H02D0C53	CCACCTGCTATGTTGGCTC	58.962	57.895	139	AGGCAAATACCCTGTTAAGTCTG	59.186	43.478	517	385	(AAGG)^17	453	Tetranucleotide
HN7TS9H02D0ID5	TCATCCTTAATAGCACGCAATCC	59.7	43.478	2	TCAGAACTGATACCCTGGTGC	60.215	52.381	418	312	(AAAT)^6	336	Tetranucleotide
HN7TS9H02D0JGQ	GCAACCTCAGTTGGTCCTG	59.113	57.895	153	AGAGGTAATATGCCTAGACAGC	57.622	45.455	555	413	(AGAT)^12	461	Tetranucleotide
HN7TS9H02D0NDO	CCCTTTGTCAGCTGCCTTG	59.785	57.895	121	TCGGTCACCAAGAACTAAGC	58.3	50	306	184	(AATG)^7	212	Tetranucleotide
HN7TS9H02D0VTY	TTGGCATGTTCTGCGACTG	59.493	52.632	353	TGGATGTGGAGAAATGGTTCAAG	59.694	43.478	608	386	(CATT)^6	410	Tetranucleotide
HN7TS9H02D15HR	TGCGCTTGAGGCAGTATAAG	58.807	50	222	GTGAGAACGGCACTGATGG	59.276	57.895	408	266	(ATCT)^10	306	Tetranucleotide
HN7TS9H02D17YC	TTGGGTAGGGCACTGGTTC	60.004	57.895	570	AGGTACAGATGCTCTTGGC	57.579	52.632	792	668	(CTGT)^7	696	Tetranucleotide
HN7TS9H02D1ID5	CATGGGAGGTTTCCACATGC	59.937	55	158	TGGTTTGGAGTCTTCCTGGG	60.004	55	390	267	(ATTT)^6	291	Tetranucleotide
HN7TS9H02D1L8T	GGCAATTGGAGGCAATGGG	60.233	57.895	195	TGGCACTTGCATGAACACC	59.709	52.632	611	258	(AGAT)^10	298	Tetranucleotide
HN7TS9H02D1L93	AGAGGGCAGAGGCTCAAATC	60.224	55	141	AGACATGCTGTTCCAAGTGAAG	59.619	45.455	562	345	(AATG)^6	369	Tetranucleotide
HN7TS9H02D1XF4	TCACATGGAAATGAACTGGC	57.062	45	53	TGGAGATGCCCATGCAGTC	60.536	57.895	307	87	(ATCT)^15	147	Tetranucleotide
HN7TS9H02D1YH1	GGGCATTCCTGGTTACCTTC	58.997	55	236	TGCTGATGACAGCCAACTC	58.51	52.632	605	279	(ATTT)^11	323	Tetranucleotide
HN7TS9H02D23CS	CTAGGGTGCCTGGTCCATC	59.929	63.158	57	GCTCACACCCATTGTAGCTG	59.658	55	470	275	(AAGG)^15	335	Tetranucleotide
HN7TS9H02D23IA	TTGGGAATACAGGGCCAGC	60.464	57.895	190	TCAAGGCAGCCAATGTTCAG	59.507	50	572	483	(AAGG)^6	507	Tetranucleotide
HN7TS9H02D23VN	ACCATTGCTGACCCAGAAG	58.101	52.632	95	AGACCTTTGGGTATAGGGCG	59.641	55	297	243	(ATTT)^6	267	Tetranucleotide
HN7TS9H02D25M4	CCTGGCCTTTGGGTAAGGG	60.77	63.158	96	GCGGCATTTGTCTGAGTCC	59.938	57.895	409	239	(AATC)^7	267	Tetranucleotide
HN7TS9H02D2FO3	CCCGGATGTTGGGAAAGAC	58.882	57.895	133	ACCCAAGGTGGAGCATACC	59.772	57.895	499	194	(GAGT)^7	222	Tetranucleotide
HN7TS9H02D2GBV	GGGAGAATGAATGCCAGTGC	60.01	55	81	GTGTTGTGTGAGCCACTTC	57.511	52.632	230	146	(ATTT)^7	174	Tetranucleotide
HN7TS9H02D2Q34	GCCAGGGCTGCTTGAAATC	60.232	57.895	5	AGACAGCTCCAGCATACCG	59.933	57.895	308	149	(ATTT)^8	181	Tetranucleotide
HN7TS9H02D2V7K	ACCTGATTGATCTTCATGGACTAC	58.854	41.667	135	GATGGCACTGCAAGTCAGC	60.231	57.895	583	223	(AGAT)^9	259	Tetranucleotide
HN7TS9H02D3K2V	ACACCACAGACGAATGTTCAG	59.268	47.619	71	GTGTCAGGAACCTACCTGGG	60.151	60	263	152	(GTTT)^6	176	Tetranucleotide
HN7TS9H02D3RUY	AGCATCAGCACCTATCCCG	60.006	57.895	35	TGTGCCCTCTGCTGGTTG	60.641	61.111	367	87	(ATTT)^6	111	Tetranucleotide
HN7TS9H02D45DG	GTGGAGTCCCTCTCCCAAG	59.471	63.158	161	CTGGAGGTGGCCCAAGAAC	61.064	63.158	554	325	(AAAT)^7	353	Tetranucleotide
HN7TS9H02D4CG3	CCCAGTCATTGAGCACATAGC	59.808	52.381	110	GGATCAATTCAGCAGAGGGC	59.438	55	530	301	(AAAT)^6	325	Tetranucleotide
HN7TS9H02D4CN3	CAGTCTGAGGTGAAAGTGGC	59.231	55	207	AGAGAAGGTGGATCAGGGTC	58.902	55	627	519	(AAGG)^11	563	Tetranucleotide
HN7TS9H02D4L62	CCTCTATAGGCAAGCTGCG	58.531	57.895	310	ACTGTGCCCTTATACCTTCCC	59.936	52.381	597	433	(AGAT)^9	469	Tetranucleotide
HN7TS9H02D4LC1	GTCTTCACCACCTCCAAAGG	58.86	55	203	GGTGGCAGACAACTCCATC	58.887	57.895	583	321	(AGAT)^12	369	Tetranucleotide
HN7TS9H02D4QH2	CAGTGCAATCCCAAATGGC	58.297	52.632	24	GTGTGGATGGAAGAGGCAAC	59.583	55	205	92	(AATG)^7	120	Tetranucleotide
HN7TS9H02D55P7	ACTAGAACAGGCAAAGTCCAAG	59.023	45.455	18	TGTGTATGGTTGGCCGGAG	60.459	57.895	336	56	(ACAG)^6	80	Tetranucleotide
HN7TS9H02D56MF	TGAAGGACTCAAGGCTGGC	60.385	57.895	617	TGCAGCACTGTCACCTATTTAC	59.426	45.455	777	714	(GATT)^6	738	Tetranucleotide
HN7TS9H02D597E	TGTACAGAACTGTGGCAAGC	59.157	50	216	GTGGCACTTGAAGGGAAGC	59.786	57.895	557	263	(GGCT)^6	287	Tetranucleotide
HN7TS9H02D5CSM	AAGCCTTCGAGCCTTCCC	60.084	61.111	158	GGAAAGTGGCCTTGGCATC	59.858	57.895	553	374	(GGAT)^10	414	Tetranucleotide
HN7TS9H02D5FV8	GCCCAGGTTCAGTGTATCAAG	59.398	52.381	25	AGCCAAGTTTGAATTCCTTGTC	58.173	40.909	440	191	(AAGG)^12	239	Tetranucleotide
HN7TS9H02D5LDR	GGCGTGTCCGAAGAACAG	59.171	61.111	63	GCAGGACCGTAAGTTTGGC	59.864	57.895	343	204	(CTTT)^16	268	Tetranucleotide
HN7TS9H02D5N9L	TGTCTTCACGTCTTGATTGTAGC	59.768	43.478	91	TCAAGGAACTCCGATTGTGC	58.942	50	373	282	(AAGG)^6	306	Tetranucleotide
HN7TS9H02D5NM8	TTCAGTGGCTTGTTCTTTGG	57.21	45	161	GGCTTGATGTCTCAATCGCC	60.082	55	597	401	(ACCT)^6	425	Tetranucleotide
HN7TS9H02D64OP	CAGGCCAGGAACCCAGTAG	60.157	63.158	314	AGCGAGTGCCTAAGAACGG	60.528	57.895	659	524	(ATCT)^10	564	Tetranucleotide
HN7TS9H02D67J8	GCAGCAGCAGGCTCTTTG	60.164	61.111	45	TGTATGCTGTCGACCTCGC	60.598	57.895	472	378	(ATTT)^8	410	Tetranucleotide
HN7TS9H02D6B0W	TGTGCAGGCAATTGAGCAG	59.785	52.632	22	GGATTGGGTTTGCTGGAGG	59.174	57.895	257	55	(ATTT)^6	79	Tetranucleotide
HN7TS9H02D6E5A	TGTTGACAGAAGCAGTTCCC	58.789	50	44	ACAAGTGTGCAAGCCAGTAG	59.155	50	479	221	(ATGT)^6	245	Tetranucleotide
HN7TS9H02D6G3M	GAGCATGGAAAGGCCCAAC	59.858	57.895	57	GCACATGGACGTGATGCTC	60.013	57.895	371	243	(AGGT)^8	275	Tetranucleotide
HN7TS9H02D6MIX	TCTGAGGCATGTCAAAGACC	58.279	50	9	GGTGCTCGGATTTCAAGGC	59.937	57.895	351	97	(ACAT)^7	125	Tetranucleotide
HN7TS9H02D6PET	CACCAACATCCCTGGCTTC	59.18	57.895	51	TGCAACAAGGGTCTCCTGC	60.987	57.895	240	171	(CATT)^6	195	Tetranucleotide
HN7TS9H02D6Y7E	TGCTGTTTATCAAATGCTGGG	57.886	42.857	2	GCTCTTACAGAGTGACGTGG	58.754	55	183	64	(AAGG)^9	100	Tetranucleotide
HN7TS9H02D715W	TGTCTTGATCCTCACCTTGG	57.606	50	29	GGGCAAGGTTCAGAAAGCC	59.783	57.895	407	243	(AATG)^7	271	Tetranucleotide
HN7TS9H02D79U9	CAGCTTCTCTGGTTGTATGGC	59.741	52.381	90	CATCCTCCTCTGTGGTATCG	57.654	55	335	204	(ATTT)^6	228	Tetranucleotide
HN7TS9H02D7D2V	CCAGGCTAAGGATTTAGATGAGC	59.446	47.826	0	ACCTGTATAGTCCCGTTGAGG	59.384	52.381	231	54	(AAGG)^15	114	Tetranucleotide
HN7TS9H02D7Q8N	TCTAACCATGCTATTGGTTTGTC	57.617	39.13	28	CCAATCAATGTCGGCTGGC	60.305	57.895	457	73	(ATTT)^9	109	Tetranucleotide
HN7TS9H02D7RFZ	AACATTTGCTGCCCACCAG	59.705	52.632	239	TCATATACAGGGACTACCTCTTGC	59.949	45.833	557	394	(AGAT)^10	434	Tetranucleotide
HN7TS9H02D7TZN	TATAACCGGCCCTGAGACC	58.934	57.895	257	CTCGCGTTATGGCCTTGTC	59.722	57.895	683	310	(AAAT)^7	338	Tetranucleotide
HN7TS9H02D7UMI	GCTCAAGGAACATCTGTACCAC	59.754	50	281	GAACCTAGTTCTCAATTATATGGGC	58.097	40	538	420	(CTTT)^15	480	Tetranucleotide
HN7TS9H02D7XG8	CCCACCAATTGCTTCTGGC	60.158	57.895	23	AGAGAACAAGAGGTTGTGGC	58.496	50	328	187	(ATCT)^12	235	Tetranucleotide
HN7TS9H02D7Z6Y	GGGACTTCCAGGTGAAGGG	60.081	63.158	284	CCATTCCTTAGCTTTGGCCG	60.01	55	619	341	(AAAT)^7	369	Tetranucleotide
HN7TS9H02D82AB	AAACCGTACAGCAGCCTTG	59.116	52.632	245	TGATGAAGTTCTGAGTAGGCG	58.243	47.619	598	377	(AAAT)^6	401	Tetranucleotide
HN7TS9H02D84O2	TGGAACAAATTGGACACTCTGG	59.548	45.455	70	GAGTTGGGTTTGCTGGAAGG	59.794	55	493	270	(ATTT)^10	310	Tetranucleotide
HN7TS9H02D8C78	TCGCCAATTTCTTCTGGGC	59.183	52.632	77	CCTTCGGGTATAGGGCAGG	59.702	63.158	268	194	(CTTT)^6	218	Tetranucleotide
HN7TS9H02D8DZL	ATGGGCACAGGAGCAAACC	61.373	57.895	172	GCTGAGCTTCTGCAATGGG	59.935	57.895	512	372	(CTTT)^15	432	Tetranucleotide
HN7TS9H02D8JHZ	GGGCATTCCTGGTTACCTTC	58.997	55	120	TGCTGATGACAGCCAACTC	58.51	52.632	485	163	(ATTT)^10	203	Tetranucleotide
HN7TS9H02D8K3O	GGACTGTGGCCTACTCCAG	59.856	63.158	136	TACTGCGGAGATCCCATGC	60.007	57.895	348	203	(CTTT)^9	239	Tetranucleotide
HN7TS9H02D8L5P	AGGAAATTCTGCTTAAGTGCTACTC	59.898	40	41	AGCTAGAAGCTGGGCATCC	59.929	57.895	463	249	(ATTT)^6	273	Tetranucleotide
HN7TS9H02D8PJ4	TGCTGCTAAGCTGGGTTCC	60.762	57.895	258	CGTCTGCTCCAAGTGCAAG	59.867	57.895	681	369	(ACCT)^6	393	Tetranucleotide
HN7TS9H02D8TVA	GGTCCTGCTGGGAATGGAG	60.537	63.158	57	CTGAAAGTGCTCAGGTGCC	59.491	57.895	345	175	(AAAT)^7	203	Tetranucleotide
HN7TS9H02D90G0	TACCAGGGTGCTTTACGGG	59.777	57.895	35	ATTCTTGCAACCTGCACCG	59.786	52.632	446	373	(ATTT)^6	397	Tetranucleotide
HN7TS9H02D944O	ACCTAGGGAGTTAGTGGCATC	59.377	52.381	3	TCAGCAGGCAAATGCAAAC	58.15	47.368	186	54	(GGCT)^6	78	Tetranucleotide
HN7TS9H02D94F0	TCACACTGGGACCTTTGGG	59.927	57.895	113	CCATCTGGTTGCAGCCTTTC	60.223	55	425	160	(AAAT)^6	184	Tetranucleotide
HN7TS9H02D98M1	CTTAGCTGCAGGTCTTCGC	59.354	57.895	69	TCAATTCTTTGCAGGAGGCAC	59.873	47.619	382	311	(ATTT)^9	347	Tetranucleotide
HN7TS9H02D9E1R	GGGTTTCAGAGTGGCTTGC	59.786	57.895	179	ACAATTGCACTGGCCTTGTAG	59.873	47.619	628	432	(AAGG)^12	480	Tetranucleotide
HN7TS9H02D9E27	TAAACGTGCAAGAGTGCCC	59.119	52.632	210	AAGGTCCCATTCTCCTGGC	59.771	57.895	551	321	(GATT)^6	345	Tetranucleotide
HN7TS9H02D9K2W	GTGCACAAGGAGAAGTTGGG	59.797	55	239	AACCAAGGCCCTGCAATTC	59.396	52.632	574	380	(ATCT)^11	424	Tetranucleotide
HN7TS9H02D9M4U	CAGTGAGATTAGAGATGACTTCTACC	59.125	42.308	118	TTACCCTGGCCTTTGGCTG	60.693	57.895	426	244	(ATTT)^7	272	Tetranucleotide
HN7TS9H02D9MV0	ACTCCGGAATAAAGCTGAAAC	57.006	42.857	366	TCAGGATTCAAGCATGGGC	58.562	52.632	585	408	(ATTT)^6	432	Tetranucleotide
HN7TS9H02D9OS2	ACCTGGGCAGAACATCCAG	60.08	57.895	449	CTTAGACCAGTCCTGCACATC	58.856	52.381	727	638	(ACCT)^6	662	Tetranucleotide
HN7TS9H02D9U1L	CCACCCAGGTACCAGCTC	59.765	66.667	120	ATGGCTGTCACACTCTGGG	60.081	57.895	557	287	(AATC)^6	311	Tetranucleotide
HN7TS9H02DA1W0	AAAGCAACAGAGCCTTGCC	59.707	52.632	7	TGGGATGCTTTGTTCAGGG	58.4	52.632	381	244	(AATC)^7	272	Tetranucleotide
HN7TS9H02DA2XJ	GGGCAGCAAGAGTCAATGG	59.561	57.895	29	GCAACCTTCTGGCTTTCCG	60.158	57.895	428	319	(CTTT)^16	383	Tetranucleotide
HN7TS9H02DA9FH	TCCAGTGGGAAGAGTTGGG	59.309	57.895	255	AGCTGCTTGTAAGAGTATTCACC	59.259	43.478	563	464	(AGAT)^11	508	Tetranucleotide
HN7TS9H02DAJRR	CAGTGTAGTTCAGAAATGGGAAGG	60.073	45.833	1	GGAGCCCAAGAGGTCAAAC	58.803	57.895	358	77	(AAGG)^14	133	Tetranucleotide
HN7TS9H02DAKAS	TAGGGCCTGTTCACGCTTC	60.457	57.895	13	TGAAAGTTTGGGCCTCTGC	59.024	52.632	287	81	(GATT)^8	113	Tetranucleotide
HN7TS9H02DAO8X	CACAAGGGCGGAAACAGTAG	59.588	55	117	TCTGTTCATTCCCTGTGGC	58.107	52.632	398	272	(AAAT)^9	308	Tetranucleotide
HN7TS9H02DAU5R	GCAGTTCCCTGCCAGAATG	59.561	57.895	152	CTTTGTGAAGTTCCCTAGGTTTC	58.072	43.478	471	357	(CTTT)^11	401	Tetranucleotide
HN7TS9H02DAVCD	ATTCATGCCACCCATCTGC	58.942	52.632	48	TTCTGGGACACATCCTGCC	60.081	57.895	475	256	(AAAT)^6	280	Tetranucleotide
HN7TS9H02DAW4V	CCCATTCATTCCCAGCCTC	58.637	57.895	329	AGGCAGTCCTAGCAGTGATG	59.935	55	631	460	(AGGG)^9	496	Tetranucleotide
HN7TS9H02DAYSS	GGTTGAAGGCACAAGGGTC	59.409	57.895	87	GATCCTGCATATGATCGCCC	59.088	55	432	308	(AATG)^9	344	Tetranucleotide
HN7TS9H02DB15G	GGACACAACCAGAAGGGAAAC	59.805	52.381	48	CAAAGCTTCCCAACAGAGCC	60.152	55	405	291	(CTTT)^13	343	Tetranucleotide
HN7TS9H02DB1T1	ATGTGCCTTCCTTAGCGGG	60.536	57.895	77	AGAGCATCCATTGAGCACC	58.264	52.632	471	382	(AAGG)^11	426	Tetranucleotide
HN7TS9H02DB5LK	TATGTGAGCAGCCCAGAGG	59.548	57.895	201	CCACCCACTTGACGCTTTG	60.084	57.895	575	250	(AATG)^7	278	Tetranucleotide
HN7TS9H02DBJC4	TCTACCACTTTGCCTGCCC	60.385	57.895	54	TGCTGAATTATCTGCTGTGAGG	59.225	45.455	349	184	(ATCT)^12	232	Tetranucleotide
HN7TS9H02DBWUJ	TTTCACTTTGGCTGGCTCC	59.024	52.632	312	TGGTGTTATCTTCACTGTGCC	58.982	47.619	578	519	(ATTT)^6	543	Tetranucleotide
HN7TS9H02DC6ZC	CAGCCAAGAAAGGAACGGG	59.488	57.895	130	GTTACCTGCCCGAGGGTTG	61.129	63.158	571	489	(AGGG)^7	517	Tetranucleotide
HN7TS9H02DCCL0	CTTGTGCCTTTACGCTCCTG	59.942	55	7	GTGCTGGTACCCTCTTAAATTCC	59.823	47.826	335	195	(CTTT)^12	243	Tetranucleotide
HN7TS9H02DCDXB	GGGAGGGATCAGTGCAGG	59.844	66.667	354	GCCATTTGGTGAAGGGCAG	60.158	57.895	573	505	(ATGT)^6	529	Tetranucleotide
HN7TS9H02DCKRG	CCACAGTCCCATCTCTGAAG	58.068	55	115	CCAATGGTGGAAACCTGGG	59.092	57.895	450	176	(ATTT)^8	208	Tetranucleotide
HN7TS9H02DCNVB	TCCTCAAAGAGGTGCAATTGAG	59.353	45.455	399	AGATCCGGCTGGCTTCATC	60.308	57.895	661	440	(ACTT)^6	464	Tetranucleotide
HN7TS9H02DDF1H	AACCACACCCTAAGGCAGG	60.003	57.895	263	TCCACCGTCGTCTGATTCC	59.859	57.895	456	402	(AAAT)^6	426	Tetranucleotide
HN7TS9H02DDHLW	GGACCCTTCACAATCAGGC	58.878	57.895	41	GACTGCTGACCCAATGCAG	59.565	57.895	409	159	(AAGG)^13	211	Tetranucleotide
HN7TS9H02DDK10	TTGCGACCTTCCCTGAGAC	60.082	57.895	123	GGGTTAAGGGCTTTGGCAC	59.782	57.895	430	186	(AAAT)^7	214	Tetranucleotide
HN7TS9H02DDNHU	TGTCTGCTGAACCAATACTGC	59.33	47.619	122	ACATATCTCCTGTTGGAAGGC	58.202	47.619	341	247	(CTTT)^12	295	Tetranucleotide
HN7TS9H02DDP9U	TGAATGGAGTTTCAGCCCATC	59.041	47.619	101	GAGCAATTCTCCGTGGAAGC	60.012	55	494	197	(CTTT)^18	269	Tetranucleotide
HN7TS9H02DDPCL	GCTTTCATGATAATTCTATTGTGACCC	59.695	37.037	41	ATGGGACCTGCCACTCATC	59.85	57.895	256	86	(AGAT)^13	138	Tetranucleotide
HN7TS9H02DDPFY	TGTCTGCTGAACCAATACTGC	59.33	47.619	122	ACATATCTCCTGTTGGAAGGC	58.202	47.619	341	247	(CTTT)^12	295	Tetranucleotide
HN7TS9H02DEC9Z	CGCTCCCAGCACCATAAAG	59.343	57.895	9	TGCTCCAGCTTAGGGCTTC	60.157	57.895	420	85	(ATTT)^7	113	Tetranucleotide
HN7TS9H02DEQ8H	CCGCCCAGAGCCCAATTC	61.578	66.667	337	GGTTGATGCTTGAGGGCTG	59.561	57.895	558	381	(AAAT)^6	405	Tetranucleotide
HN7TS9H02DETEH	TTGCAAGACAGTGCTCCAG	58.736	52.632	165	CACATCTCACTTGCCAGCC	59.565	57.895	540	216	(AGAT)^11	260	Tetranucleotide
HN7TS9H02DEYPO	TCCCTGCCATCCAAGTGTC	60.081	57.895	75	ACCCAGGGACTCAACAAGG	59.617	57.895	432	374	(AGGG)^6	398	Tetranucleotide
HN7TS9H02DEZ6N	TAGGTTGGGAGCACACTGG	59.699	57.895	51	GAGACCATGCCTCTCGGTG	60.603	63.158	316	150	(GGAT)^8	182	Tetranucleotide
HN7TS9H02DF1HT	GGACCCATTTCAGTGGTGC	59.483	57.895	267	TGCTTGTAAGCCATCTTGAGC	59.671	47.619	546	462	(ATCT)^10	502	Tetranucleotide
HN7TS9H02DF2VS	AGCCCTCCTTTGGATCTGC	60.157	57.895	211	ACACCCTCCTAAACAGGAACC	60.076	52.381	578	430	(ATCT)^6	454	Tetranucleotide
HN7TS9H02DF8D3	TCTGTAAGTGGCAGGGTCG	59.782	57.895	7	TCTGGTCTTCCATCAGAGATTCC	60.073	47.826	350	96	(GTTT)^6	120	Tetranucleotide
HN7TS9H02DFKMH	TCATGCAGGTAGGCTGTGG	60.157	57.895	158	TCCAATATCATTGCTGGGTTTCC	59.819	43.478	577	516	(GGTT)^6	540	Tetranucleotide
HN7TS9H02DFOXZ	CCTGCACTTGTGGAACTGTC	59.799	55	170	TTGCCTTGGCCGTGATTTC	59.785	52.632	570	236	(AGAT)^12	284	Tetranucleotide
HN7TS9H02DFQL2	TCCCAGTCACCCTTAGTTCC	59.123	55	26	TGACCGAGCATTCCTTAGTG	58.079	50	473	73	(AAGG)^9	109	Tetranucleotide
HN7TS9H02DFT1D	TGAAACTATGGTGAAGGGCAG	58.695	47.619	113	CATGACTCACCGGCTTCAG	58.978	57.895	546	171	(AGGT)^8	203	Tetranucleotide
HN7TS9H02DFV38	GCATGTCCTGCATTCTGGG	59.635	57.895	7	CCCTTCTGTGGAACACTGC	59.113	57.895	445	113	(ATTT)^7	141	Tetranucleotide
HN7TS9H02DFV92	ACCCACCCTGAGACCTTTG	59.617	57.895	90	CAGCTCCTCTGTGGAAGGG	60.157	63.158	410	133	(AAAT)^6	157	Tetranucleotide
HN7TS9H02DFWXE	CCGGGACTGTATTGGGAGC	60.608	63.158	50	AAGGGAATGTTTGCCCAGC	59.396	52.632	470	340	(AAGG)^13	392	Tetranucleotide
HN7TS9H02DFZ12	TGCATTCTGCTTCCAGGTTG	59.507	50	98	GGTGCTCTTGGTGCAGTTC	59.788	57.895	516	134	(AAGG)^13	186	Tetranucleotide
HN7TS9H02DG2EW	TGAGTGTGTGGAAGCAGCC	60.982	57.895	30	TCTCAGGGTAAGCTTGGGAG	59.2	55	455	75	(CTTT)^17	143	Tetranucleotide
HN7TS9H02DGAKO	GCTGTAATCTGCAAGGTGGC	60.293	55	117	GAAAGCAACTCGTGGGCTG	60.158	57.895	471	196	(AAGG)^10	236	Tetranucleotide
HN7TS9H02DGEMK	GTACCCAGGCCTCCCATTC	60.233	63.158	86	ACTACGTGGAGGCTCGTTG	60.158	57.895	387	164	(ATCC)^7	192	Tetranucleotide
HN7TS9H02DGIFG	AGCTGTGGCATTCAGCTTC	59.185	52.632	25	ACCTTCTGGTGAAGGGCAG	60.004	57.895	328	274	(ATTT)^6	298	Tetranucleotide
HN7TS9H02DGJMH	TCTTTCCTCCTCCAGTGAGC	59.497	55	20	GAGATCTGCCAGGGAGCC	59.925	66.667	394	63	(ATTT)^8	95	Tetranucleotide
HN7TS9H02DGJW8	GAACTGAGGCAGGCAACTG	59.491	57.895	19	ACAGCCAATGGAGTGGGAC	60.386	57.895	358	81	(AAAT)^6	105	Tetranucleotide
HN7TS9H02DH01P	CAGAATAAAGAAATCAGTGGCATGG	59.497	40	127	GGAAGCAGGTTCACCAAAGC	60.435	55	396	170	(AAGG)^8	202	Tetranucleotide
HN7TS9H02DH1Q7	TGGCCACAGTCTCAGTTATCC	60.215	52.381	225	AACAACACTGATTCCTCATGCC	59.945	45.455	374	302	(CTGT)^6	326	Tetranucleotide
HN7TS9H02DH2DH	TGCTGGGTAAGGCTTCAGG	60.081	57.895	79	GGCAGATGCGTCCAAATCC	60.01	57.895	477	131	(AAGG)^16	195	Tetranucleotide
HN7TS9H02DHG9S	CCTGTATTCTGCTTGTTGGGC	60.282	52.381	206	CAACGTCCCTGACACATTACC	59.676	52.381	511	279	(CTTT)^15	339	Tetranucleotide
HN7TS9H02DHYOG	TGCACAAGGAGAAGTTGGG	58.337	52.632	241	CTGTGCACGTCCATTATTTGC	59.219	47.619	518	383	(ATCT)^11	427	Tetranucleotide
HN7TS9H02DI35K	AGTACTGCTGGAATCTGCTTTG	59.422	45.455	257	TCCTTGGTAGGACAGAACCC	59.123	55	576	418	(ATTT)^10	458	Tetranucleotide
HN7TS9H02DI6AK	TCCTGGAGCTCTGAATGCG	60.232	57.895	69	GGCCATTTGCAAGGAGTCG	60.232	57.895	402	292	(ACAG)^7	320	Tetranucleotide
HN7TS9H02DI7PG	GGTTGGCCCATTTAGGTCAG	59.287	55	187	GCTGAATGCACTGATGCCAC	60.921	55	628	419	(CTTT)^13	471	Tetranucleotide
HN7TS9H02DI8PG	CCGTGAGAACCTTAGCTTGAG	59.137	52.381	235	ACATGGTTACAAGAGTTGCATTC	58.386	39.13	417	341	(CATT)^6	365	Tetranucleotide
HN7TS9H02DIC83	AGGCCCTCCTGGTTGTAG	58.615	61.111	61	CAAACAGGCCCTTTGAGTGG	60.08	55	418	341	(AAAT)^10	381	Tetranucleotide
HN7TS9H02DIEUU	AGATCTGAATACTAAGGCAAAGC	57.173	39.13	89	GTCACCCTGGTGCAGAGC	61.103	66.667	516	233	(AAGG)^11	277	Tetranucleotide
HN7TS9H02DIGZ3	CTCTGTGTGGGCATTGCAG	59.862	57.895	192	ACCCACCCTGAAACCTTCG	60.309	57.895	398	330	(ATTT)^7	358	Tetranucleotide
HN7TS9H02DIHG8	TATGGGACTTGGAGCAGCC	59.851	57.895	150	AGTCCTGCGGAATAAGCCC	60.233	57.895	558	179	(GTTT)^6	203	Tetranucleotide
HN7TS9H02DIJEH	GCTCAAGGAACATCTGTACCAC	59.754	50	281	AGAACCTAGTTACTCAATTATATGGGC	59.413	37.037	540	420	(CTTT)^15	480	Tetranucleotide
HN7TS9H02DIJY0	AAGCCTTCGAGCCTTCCC	60.084	61.111	158	GGAAAGTGGCCTTGGCATC	59.858	57.895	550	374	(GGAT)^10	414	Tetranucleotide
HN7TS9H02DIMPI	GTTTGATCCTTTATACAGAAGCCC	58.389	41.667	0	TCAGCTGCAAACCACCAAG	59.333	52.632	401	60	(AAAT)^6	84	Tetranucleotide
HN7TS9H02DIUZM	ATGGCTGGAAGCAGTGGC	61.118	61.111	28	AAACTCGCCCTCCTGGTTG	60.686	57.895	414	76	(ATTT)^9	112	Tetranucleotide
HN7TS9H02DJ2DZ	TTAGGGCTATGACTGCATCC	57.534	50	26	CAGGGAGGGACCTGTTGAG	59.777	63.158	471	280	(ATCC)^10	320	Tetranucleotide
HN7TS9H02DJ62K	CCCAAATGGACTGTGCCTC	59.18	57.895	25	GCCATAGTCAGCAGAAGGATTTC	60.2	47.826	316	187	(AGAT)^12	235	Tetranucleotide
HN7TS9H02DJAPP	AAGGCAGGCTTCAGTTTGG	59.02	52.632	177	AGGCCTTCATGCCTGATCC	60.234	57.895	504	419	(CTTT)^6	443	Tetranucleotide
HN7TS9H02DJGIX	CCCTTCCCTGGACTCTGC	59.764	66.667	101	TGGTCGTAGTTTCTACATGTTCAG	59.297	41.667	545	310	(AGAT)^10	350	Tetranucleotide
HN7TS9H02DJTZ5	TGAACTATGCCACCTGGGC	60.462	57.895	92	TTTCTCTGGCACCGTTTGG	59.035	52.632	491	230	(CATT)^8	262	Tetranucleotide
HN7TS9H02DK3BI	TGTTTGTGCCCAGTCATGC	59.709	52.632	262	GACCGATGACCCTCTGGAC	59.933	63.158	652	366	(AAAT)^6	390	Tetranucleotide
HN7TS9H02DK4SN	GGCACAAATACTTGAGGATCACC	60.387	47.826	233	ACATTAGCAGAATGACAAAGGGTC	60.073	41.667	539	415	(GATT)^7	443	Tetranucleotide
HN7TS9H02DK5TJ	TGACTGACAAGTGCAAAGAAGG	59.816	45.455	5	AAAGGATGCTGACATGCGG	59.262	52.632	400	101	(CATT)^8	133	Tetranucleotide
HN7TS9H02DK869	GAAAGCAGGCTGGAGATATTTG	58.192	45.455	0	TTCACTGCCCTGGAACCTG	60.31	57.895	252	81	(AAAT)^7	109	Tetranucleotide
HN7TS9H02DKFJ4	AGTGGGTAGTGTTTGATTTCATAG	57.46	37.5	8	GTTTGGAAGGCTGAGACGC	59.865	57.895	237	151	(AGTT)^6	175	Tetranucleotide
HN7TS9H02DKGZR	AAGTACCATTGCATGAATCCAG	57.505	40.909	4	TCCTGTACACTACTTTGTAGACATTC	59.176	38.462	209	126	(ATTT)^9	162	Tetranucleotide
HN7TS9H02DKLVA	AGCATCAGCACCTATCCCG	60.006	57.895	35	CCCTCTGCTGGTTAGCCTC	60.233	63.158	365	87	(ATTT)^6	111	Tetranucleotide
HN7TS9H02DKNXZ	TCATGCAGAGCCCAAGAGC	60.835	57.895	5	CCAACCTCCATGCAACCTG	59.482	57.895	179	60	(ATCT)^11	104	Tetranucleotide
HN7TS9H02DKXDF	TGGTGCATTACCATTTGCCC	59.863	50	24	ACAAGGAAAGTCTTGAACAGC	57.416	42.857	384	314	(ACAT)^6	338	Tetranucleotide
HN7TS9H02DLFPN	GCAAGCAAGGCCCATTCAG	60.529	57.895	423	AGTGGGATGCAACCTGACG	60.758	57.895	667	530	(AGAT)^9	566	Tetranucleotide
HN7TS9H02DLHZN	GCCTTCACAGACTTCTGATCC	59.128	52.381	32	ACCATTAAGATATCACATCGTTCCC	59.547	40	389	97	(AGAT)^13	149	Tetranucleotide
HN7TS9H02DLQZJ	TTCGGCAGACTGAGGATGG	59.856	57.895	2	ACCCTACGCTGTTGGTAAAG	58.288	50	263	168	(ATCT)^9	204	Tetranucleotide
HN7TS9H02DM3FM	GGGAAACAAATCTCTAGCAGTCG	60.138	47.826	14	AGGTGAACTTCCATTCACAGG	58.622	47.619	221	50	(GGAT)^7	78	Tetranucleotide
HN7TS9H02DMAV3	GGATAAGCAGGGAAGAGAATTTG	58.001	43.478	30	ACCAGAACTGCTTGGCTAAAG	59.254	47.619	202	63	(AAGG)^11	107	Tetranucleotide
HN7TS9H02DMLTR	CACCACACTTCTCAGCATAGG	59.129	52.381	73	ACAAACTGTGTTCAGACGCC	59.73	50	406	126	(AAGG)^16	190	Tetranucleotide
HN7TS9H02DMNRE	GGCGTGTCCGAAGAACAG	59.171	61.111	69	GGCTACGAGAGAACCGTGG	60.598	63.158	434	208	(CTTT)^11	252	Tetranucleotide
HN7TS9H02DMWHQ	GGCAATCCCAAATGGTAGCC	60.008	55	184	AGCCCATTTCTTCAGGTAGGG	60.216	52.381	535	288	(GATT)^9	324	Tetranucleotide
HN7TS9H02DMWLZ	AGTGGGTAGTGTTTGATTTCATAG	57.46	37.5	8	GTTTGGAAGGCTGAGACGC	59.865	57.895	237	151	(AGTT)^6	175	Tetranucleotide
HN7TS9H02DN1QM	GGCAACACTTATGCCGGAC	59.937	57.895	20	GGATGCAACACAGGATGCC	59.934	57.895	235	144	(AAAT)^6	168	Tetranucleotide
HN7TS9H02DN2XT	GGAATCCAGCTCTTAATTGGTTG	58.51	43.478	11	GAAGGGACTGGTGTTTGGC	59.409	57.895	359	194	(AGAT)^7	222	Tetranucleotide
HN7TS9H02DNJJM	TCCTGGAGCTCTGAATGCG	60.232	57.895	69	GGCCATTTGCAAGGAGTCG	60.232	57.895	402	292	(ACAG)^7	320	Tetranucleotide
HN7TS9H02DNX2K	ACATGGTTACAAGAGTTGCATTC	58.386	39.13	71	TCCATGAGAACCTTAGCTTGAG	58.291	45.455	253	129	(AATG)^6	153	Tetranucleotide
HN7TS9H02DO3I8	GACTCAATGGGAAAGACCCAG	59.047	52.381	15	GCATCCAATCACAGAGGGC	59.336	57.895	384	99	(AGAT)^9	135	Tetranucleotide
HN7TS9H02DOKBL	TCTCAGAAGACTGGGAAGGC	59.497	55	318	ATCACTGGCCCTGAACCAC	60.386	57.895	547	449	(AAGG)^12	497	Tetranucleotide
HN7TS9H02DOR3U	TCCGTGCTACAGCTTCAGG	60.158	57.895	207	ACCCTAGGCAACGTTTATTCAG	59.158	45.455	599	530	(AATG)^6	554	Tetranucleotide
HN7TS9H02DOU7R	TGTGATGAACCCAGGAGCC	60.081	57.895	11	CTGCACCAGCTACCATTGC	59.936	57.895	430	191	(AAGG)^15	251	Tetranucleotide
HN7TS9H02DOVEH	GGCGTGTCCGAAGAACAG	59.171	61.111	63	GCAGGACCGTAAGTTTGGC	59.864	57.895	341	204	(CTTT)^16	268	Tetranucleotide
HN7TS9H02DOY1T	TGATGAGTTCCCTGGCTCG	59.856	57.895	169	AAGGCTGAGACGCACTTC	58.053	55.556	616	531	(AGTT)^8	563	Tetranucleotide
HN7TS9H02DP03A	GCTGAGGGAAACCTGCAAC	59.786	57.895	50	ACATGCTCTCCCAAATGGC	58.867	52.632	405	194	(AAAT)^9	230	Tetranucleotide
HN7TS9H02DP06T	GTGAAGACACACCTCCTTACC	58.715	52.381	2	GCTTGTGTCAAGGGCTACC	59.189	57.895	226	167	(AAAT)^6	191	Tetranucleotide
HN7TS9H02DP4ZW	AGGTCTGGTGAAACTGGAGG	59.713	55	38	GCCAGAGGCACAATGTAGG	58.962	57.895	386	125	(AAGG)^17	193	Tetranucleotide
HN7TS9H02DPAWS	GGTCAAGTGCAGAAAGGGC	59.786	57.895	19	TGGCTACTGGTGTTTGCAC	59.035	52.632	330	104	(AAAT)^6	128	Tetranucleotide
HN7TS9H02DPCOM	GGGATGACTCCATGCTGAC	58.356	57.895	36	TGTCAGGTTCTGAGCTAATGG	58.147	47.619	428	285	(ATTT)^6	309	Tetranucleotide
HN7TS9H02DPGMV	TGTAGCTTGGGTTCATTGCTC	59.325	47.619	21	TCCTTCCTTCTCTGAATGACAAC	58.873	43.478	243	63	(AGGG)^8	95	Tetranucleotide
HN7TS9H02DPI0V	AGCAGACTCCTGAACCAAGG	60.079	55	109	TTTGCACAGCACGGTTTGG	60.6	52.632	508	444	(AATC)^6	468	Tetranucleotide
HN7TS9H02DPKCK	ACCTGGCCTGAGACCTTTG	60.004	57.895	533	ACAAACTCTATGAGTGCAAGACC	59.448	43.478	718	576	(AAAT)^6	600	Tetranucleotide
HN7TS9H02DPNNU	CTGAATCCTCACGCATAGCAG	59.612	52.381	51	CTGCACCTGCCCAATCTTC	59.561	57.895	451	90	(AAAT)^7	118	Tetranucleotide
HN7TS9H02DPO3J	AGCATCAGCACCTATCCCG	60.006	57.895	36	GGGTTGGCCTTGACTCTTAATAC	59.823	47.826	193	88	(ATTT)^6	112	Tetranucleotide
HN7TS9H02DPZ0Y	TGCAGCATCGTAGTGCCTC	60.897	57.895	398	CACCTAGTATGTAAAGTTTGTTTCCTC	59.054	37.037	699	532	(ATTT)^6	556	Tetranucleotide
HN7TS9H02DPZLX	TGGCCAGGCATGTAGAAGG	60.157	57.895	11	GGCACCTCATTGGCTGTTC	59.86	57.895	350	63	(AGGG)^11	107	Tetranucleotide
HN7TS9H02DQO9E	AGCGCAGGGCTTGCTATG	61.26	61.111	274	CGTGCCAGCAAATACTCCC	59.641	57.895	475	328	(CTTT)^11	372	Tetranucleotide
HN7TS9H02DQQ63	TGGTGCATTACCATTTGCCC	59.863	50	24	ACAAGGAAAGTCTTGAACAGC	57.416	42.857	383	314	(ACAT)^6	338	Tetranucleotide
HN7TS9H02DQXOS	ACATGGTTACAAGAGTTGCATTC	58.386	39.13	71	TCCATGAGAACCTTAGCTTGAG	58.291	45.455	253	129	(AATG)^6	153	Tetranucleotide
HN7TS9H02DQZ9U	AAATGTTGCTCTGGCTGGG	59.096	52.632	255	GGGCTCAACGCAAGTGTAG	59.572	57.895	515	297	(AAGG)^16	361	Tetranucleotide
HN7TS9H02DQZG6	GAAAGCAGGCTGGAGATATTTG	58.192	45.455	0	TTCACTGCCCTGGAACCTG	60.31	57.895	252	81	(AAAT)^7	109	Tetranucleotide
HN7TS9H02DR0GA	TGTCCAAGAGTGGACTGCC	60.006	57.895	152	GAGCCTGATCACGTAGCAC	58.767	57.895	458	366	(AAGG)^15	426	Tetranucleotide
HN7TS9H02DR0JM	TTTGGCAGGGAAATGGAGG	58.388	52.632	212	TGACTTCTTAACACCTTGGGC	58.906	47.619	579	438	(AAGG)^20	518	Tetranucleotide
HN7TS9H02DR3ZH	AGGATGGACCTCTGACTGC	59.163	57.895	192	GTCTCGAGGGTGGGTTACG	60.232	63.158	585	279	(CTTT)^15	339	Tetranucleotide
HN7TS9H02DR6WM	TGAGACTTCTGGGTATCGGG	58.99	55	2	TGGTGATGGCTGACATTAGTTC	59.157	45.455	171	51	(AAAT)^6	75	Tetranucleotide
HN7TS9H02DRMLX	GGGCTGTCAATGGGAGGAC	60.838	63.158	126	GCTCTTAGGCTGCATCCAC	59.043	57.895	553	164	(ATTT)^6	188	Tetranucleotide
HN7TS9H02DRYSY	GGTAAGTGGCAGGGATTGG	58.566	57.895	314	GGATGGGATTCTCCTGACCC	60.005	60	549	354	(AGAT)^10	394	Tetranucleotide
HN7TS9H02DS3CZ	GGAAGTGAACGTAAGCCTGC	59.943	55	221	GCCTCGAATTCAGACTGGG	58.671	57.895	406	261	(AAGG)^12	309	Tetranucleotide
HN7TS9H02DS87M	GATGGCTCAGGGTTTCTGC	59.261	57.895	75	GCTGCCTCCAGCATTTGAC	60.232	57.895	344	281	(GAGT)^6	305	Tetranucleotide
HN7TS9H02DS8PI	AGGTGTAGACATGGTACTTGC	58.151	47.619	72	AGAAAGCCGTTCCCTGACC	60.384	57.895	457	250	(ATTT)^8	282	Tetranucleotide
HN7TS9H02DSDOW	GTGACACACCCTAAGAGCTTC	59.063	52.381	89	ATTTCCATGTGCGCATCCC	59.633	52.632	443	147	(ACAT)^7	175	Tetranucleotide
HN7TS9H02DSKER	AACCCAGGTCACAGAAAGG	57.627	52.632	348	CGTACCTAAGGCATTTCCTAGATTG	60.072	44	648	469	(ATTT)^7	497	Tetranucleotide
HN7TS9H02DSKUH	GGCAGCAGTACCTGGAAATC	59.369	55	332	TGCTGAAGTGAAGCACCTAC	58.582	50	568	445	(AGGG)^7	473	Tetranucleotide
HN7TS9H02DSP4U	TCTGCCAGGTTTGTATGACC	58.272	50	69	TGTGGATGGCCTTGTACCC	60.08	57.895	516	297	(ATCC)^7	325	Tetranucleotide
HN7TS9H02DSRAZ	ACTCCAGATTGGTGGATGC	57.869	52.632	42	GCACACAGGTCTGCTAATTCC	60.012	52.381	468	164	(CTTT)^16	228	Tetranucleotide
HN7TS9H02DSUZU	ATGTGCCTTCCTTAGCGGG	60.536	57.895	77	GCATCCATTGAGGCACCAG	59.635	57.895	469	383	(AAGG)^11	427	Tetranucleotide
HN7TS9H02DT6MB	TGCATTCTGCTTCCAGGTTG	59.507	50	98	GGTGCTCTTGGTGCAGTTC	59.788	57.895	516	134	(AAGG)^13	186	Tetranucleotide
HN7TS9H02DT7S6	AGCCACGCAAACTTCAGTC	59.419	52.632	112	GGGATTGTTGAGGGCTTGC	59.858	57.895	539	334	(GGAT)^13	386	Tetranucleotide
HN7TS9H02DTMGI	GACAAGCATCCCAAATCCCTG	60.01	52.381	194	CCTCTCCAGTGCCCATGTC	60.534	63.158	588	243	(GATT)^6	267	Tetranucleotide
HN7TS9H02DTMNW	AGGTGCCCGATGATGTAGC	60.308	57.895	22	TTGTCCACCTCCTGCAGAC	60.006	57.895	356	234	(AAGG)^20	314	Tetranucleotide
HN7TS9H02DTO3H	TCTCTTGGCAGTTGGCTCC	60.385	57.895	174	CCTCTTCACCCAGGCCTTC	60.461	63.158	424	233	(ATTT)^7	261	Tetranucleotide
HN7TS9H02DTSK2	TCGGGCCTTTGGGTGAAG	60.323	61.111	108	ACCTGCCCTGAGACCTTTG	60.004	57.895	409	145	(AAAC)^6	169	Tetranucleotide
HN7TS9H02DTV36	TGCTAAATTGTTCTGGCAAGC	58.45	42.857	56	CCCTTGTTCCCTCAACAGC	59.106	57.895	392	137	(AAAT)^7	165	Tetranucleotide
HN7TS9H02DTZR2	CCACCCAGGTACCAGCTC	59.765	66.667	123	GCCCTAGCTTGTGGACTTC	58.586	57.895	412	291	(AATC)^6	315	Tetranucleotide
HN7TS9H02DU0UZ	CAATCAAGTCCAAGGGCAGG	59.578	55	35	ACAGACCTTGTGCTCCCAC	60.309	57.895	435	136	(ATTT)^6	160	Tetranucleotide
HN7TS9H02DU17M	CACCCAATGCAGGCAGAAC	60.158	57.895	96	CCACCTGGGTGAAATTGCC	59.781	57.895	449	288	(AGGC)^7	316	Tetranucleotide
HN7TS9H02DU4GP	CTGCCTGTGCAGATTGGC	59.853	61.111	111	GAGTTCTGCCTGTGTGACC	58.822	57.895	522	408	(AAGC)^6	432	Tetranucleotide
HN7TS9H02DUKBL	GCTGGACAGAGCATTTGCG	60.595	57.895	188	GCAAGCTTTGGGATCAGGC	60.232	57.895	633	407	(AAAT)^6	431	Tetranucleotide
HN7TS9H02DUKDX	TCAGGGCCCACTAATCTGAC	59.567	55	63	GTCTGGGCTGTGCTCCATC	61.202	63.158	366	158	(ATTT)^6	182	Tetranucleotide
HN7TS9H02DURPC	TGTGCTCAGGAATTATGGAGTG	58.89	45.455	376	TGTCCTGCCAAGGTGGATG	60.386	57.895	579	433	(ATTT)^7	461	Tetranucleotide
HN7TS9H02DUSIO	ACAGATCTTCAGCAAAGTGCC	59.601	47.619	40	GCTGTCCTTTGACAGTCCC	58.813	57.895	251	163	(AAGG)^12	211	Tetranucleotide
HN7TS9H02DUW5G	GCTCCCTTCATTTGAGGCAC	59.939	55	59	CTGTCTTGCAGTAGCTGACG	59.389	55	413	161	(ACTC)^9	197	Tetranucleotide
HN7TS9H02DV1UD	AGCTTCTGGTAACTTTCAGATTGG	59.769	41.667	182	CAGCAAGAACGCCTCTGC	59.858	61.111	480	259	(AAAT)^6	283	Tetranucleotide
HN7TS9H02DV62J	CCCATTCATTCCCAGCCTC	58.637	57.895	330	AGGCAGTCCTAGCAGTGATG	59.935	55	632	461	(AGGG)^9	497	Tetranucleotide
HN7TS9H02DV82Z	TCTATAAGGGTGCTCAAGCC	57.462	50	4	AAGGGCATAGTCGTCCCAC	59.854	57.895	399	170	(AAGC)^6	194	Tetranucleotide
HN7TS9H02DVZUI	AGCGCATTGAGAGATTTAGGC	59.537	47.619	117	TGTGGAATCATGGACTGGG	57.471	52.632	474	159	(ATCT)^11	203	Tetranucleotide
HN7TS9H02DW01F	ACAACTTCTGCATAATGGCTC	57.343	42.857	181	GTGCTTTCGTGCACATCCC	60.523	57.895	533	318	(AGAT)^11	362	Tetranucleotide
HN7TS9H02DW0MA	GCAGGTTGTACACATCTTCCC	59.671	52.381	58	GAGCTGCGAAACCTTCTGG	59.57	57.895	410	145	(AAAT)^7	173	Tetranucleotide
HN7TS9H02DW67G	CGGTTTCTCCGATTTGCTCC	60.013	55	22	ATGAGAACGGGAAGGCCAC	60.46	57.895	446	136	(AGGG)^8	168	Tetranucleotide
HN7TS9H02DWBS4	GTGGACGTCTGGGATAGGG	59.63	63.158	1	TTTAACCCTTGGGCTTCCAC	58.765	50	434	264	(AAAT)^6	288	Tetranucleotide
HN7TS9H02DWCUH	TCCCTCTGCAGGTTGGTTC	60.004	57.895	260	CTCCTCCTTCCATCAGAGGC	60.007	60	701	647	(AAAC)^6	671	Tetranucleotide
HN7TS9H02DWF1M	GCACAAACCAGTACTTAACAGC	58.862	45.455	7	TCTACAACCGGCAGCACTC	60.455	57.895	371	129	(AAGG)^14	185	Tetranucleotide
HN7TS9H02DWHIU	TCCAGATCAATGGGCCAGAC	60.224	55	185	TGCTGCAAATTCACTTCCAC	57.949	45	397	258	(CTTT)^13	310	Tetranucleotide
HN7TS9H02DWMV1	CAATGGCAGACAGCCCAAG	59.859	57.895	213	TGACTCGCCAGTGTCCAAC	60.678	57.895	605	326	(AAAT)^8	358	Tetranucleotide
HN7TS9H02DWN1A	AGGAAGGTCTTACCTGGGC	59.075	57.895	166	TGTTGCATCGGGCAAACTC	59.787	52.632	534	201	(ATTT)^6	225	Tetranucleotide
HN7TS9H02DWNBL	GGTGAGCCTTGCAGGATTG	59.561	57.895	86	TGCAGCTCTAACCAGTCGG	60.158	57.895	482	189	(ATCC)^6	213	Tetranucleotide
HN7TS9H02DWUD7	TGTTGGGCACTCTGAAGGG	60.31	57.895	62	TCCTGAGGCAGAATAATGGG	57.438	50	384	225	(ACTC)^6	249	Tetranucleotide
HN7TS9H02DWUM7	TCCTTGCCTTACGAAACAGC	59.23	50	269	GCAGACTCAGAGAAATGTTGGG	60.012	50	577	401	(GGAT)^9	437	Tetranucleotide
HN7TS9H02DWW9M	CCACCGTCAGAAAGTTGGG	59.116	57.895	184	ACCAGAGAACGGAGCCTTG	60.082	57.895	559	284	(AAGG)^16	348	Tetranucleotide
HN7TS9H02DWYZH	TCTCTGCCCTGCATCCTAC	59.242	57.895	15	TAAACCTGAGCTTGGGCAG	58.107	52.632	425	129	(CTTT)^13	181	Tetranucleotide
HN7TS9H02DXL0Y	GCAACTCGAGCATATCTGGG	59.237	55	114	GGCCTCCCTTGACTACACC	60.157	63.158	481	174	(AAAT)^11	218	Tetranucleotide
HN7TS9H02DXML9	GTGGGATGGGTTCAGCAGG	61.139	63.158	101	ACCAGCAAACTTCCCAATGC	60.08	50	470	222	(AAAT)^9	258	Tetranucleotide
HN7TS9H02DXNJE	AATGGTGCAGTGAACTGGG	58.717	52.632	98	CCAGAGGTGCTGTCAGGG	60.084	66.667	281	137	(GATT)^10	177	Tetranucleotide
HN7TS9H02DXQQF	TGCATTCTGCTTCCAGGTTG	59.507	50	98	GGTGCTCTTGGTGCAGTTC	59.788	57.895	516	134	(AAGG)^13	186	Tetranucleotide
HN7TS9H02DXT5U	TGGGATTGAGCAGCTGTGG	60.763	57.895	189	GCCATACGTGACTGGCTTC	59.351	57.895	479	323	(AAGG)^14	379	Tetranucleotide
HN7TS9H02DXWE0	AGGGTGTAGAGCACACTTG	57.431	52.632	0	TGGAGGCCCGTAAACAACC	60.687	57.895	202	63	(AAAT)^7	91	Tetranucleotide
HN7TS9H02DY2C7	TTGCAAGACAGTGCTCCAG	58.736	52.632	165	CACATCTCCACTTGCCAGC	59.565	57.895	541	216	(AGAT)^11	260	Tetranucleotide
HN7TS9H02DY9QV	CCAGGCCTTGTCAGAAACC	59.106	57.895	107	AGGCACTCATTCAAAGCTCAAG	59.946	45.455	388	240	(AAAT)^6	264	Tetranucleotide
HN7TS9H02DYC2J	CCACGTAAGAACGCCAGAC	59.286	57.895	206	CACACAGGGAAAGGAGCAC	59.113	57.895	648	536	(AACT)^6	560	Tetranucleotide
HN7TS9H02DYECA	AGTGGGTAGTGTTTGATTTCATAG	57.46	37.5	8	GTTTGGAAGGCTGAGACGC	59.865	57.895	237	151	(AGTT)^6	175	Tetranucleotide
HN7TS9H02DYU5Y	GCCAGGGCTGCTTGAAATC	60.232	57.895	5	AGACAGCTCCAGCATACCG	59.933	57.895	308	149	(ATTT)^8	181	Tetranucleotide
HN7TS9H02DYYFP	CAGCTGAGGCTGCTAAAGG	58.967	57.895	215	CTGCGGAGTGAACAGATGTC	59.384	55	643	404	(AAAT)^6	428	Tetranucleotide
HN7TS9H02DZ773	GCGAGGCTGAAGGAAATGG	59.64	57.895	96	AGGAGCCCGGCATTATCTG	60.005	57.895	482	299	(ATCT)^6	323	Tetranucleotide
HN7TS9H02DZA51	GAGCAGCTGGTTGGTGAAC	59.788	57.895	243	ACCAGGAAGTGGTGTGAAC	57.956	52.632	638	454	(AGAT)^10	494	Tetranucleotide
HN7TS9H02DZA9T	TTTCACTTTGGCTGGCTCC	59.024	52.632	312	TGTTGTGTTATCTTCACTGTGCC	60.2	43.478	577	519	(ATTT)^6	543	Tetranucleotide
HN7TS9H02DZF0B	CTTGCACATGCAGAGCTGG	60.232	57.895	355	AGTACTTTGCCAAGCCTTCC	58.851	50	675	597	(AGGT)^6	621	Tetranucleotide
HN7TS9H02DZN78	TTTGCAGCAGGGAGGGAAC	60.993	57.895	1	GAGACAAGGAAGAAAGCCCTC	59.053	52.381	155	40	(CTTT)^16	104	Tetranucleotide
HN7TS9H02DZUCK	TGTATCTGGAACATTTCACTGGC	59.76	43.478	178	TGGTACCTGTAACCTTGGATGG	60.208	50	331	229	(ATCT)^11	273	Tetranucleotide
HN7TS9H02EA2TX	TCCCTAAGAAAGCTCTTGCC	57.974	50	7	CCTCACTATGGTGCTGGAATG	59.19	52.381	173	75	(GATT)^6	99	Tetranucleotide
HN7TS9H02EAAZY	CATGCTGTGATAACATCTAGGC	57.747	45.455	120	CCTCTAGCTCCACGCAACC	60.898	63.158	533	153	(ATTT)^7	181	Tetranucleotide
HN7TS9H02EAJK1	GTGTTGCTTGCCGAAATAAGG	59.146	47.619	20	CATTCTTTGCCCGGTCTGC	60.232	57.895	274	68	(ATTT)^6	92	Tetranucleotide
HN7TS9H02EAQ5C	AGATCTGCCACTGAAGCCC	60.157	57.895	69	TGCATCTGTGCATATAGTCAGG	58.765	45.455	510	379	(AATC)^7	407	Tetranucleotide
HN7TS9H02EAQUK	CAGTTGGGCCTTCAGCTTG	59.785	57.895	230	ACCAGGAATCTCAGGACTGG	59.197	55	596	510	(AAAT)^6	534	Tetranucleotide
HN7TS9H02EAS6D	ACATGGTTACAAGAGTTGCATTC	58.386	39.13	71	TCCATGAGAACCTTAGCTTGAG	58.291	45.455	253	129	(AATG)^6	153	Tetranucleotide
HN7TS9H02EASQK	GTAGGCCCATGGTAGCCAG	60.309	63.158	155	GCTCTTCCCTTCCACCCAG	60.461	63.158	363	304	(AGGG)^6	328	Tetranucleotide
HN7TS9H02EAU0I	AATAGTCTTTCTTCACCAACCAG	57.225	39.13	90	CACCAAAGTGTGAGCAGGC	60.084	57.895	441	126	(ATCT)^10	166	Tetranucleotide
HN7TS9H02EB5V2	AGGACCTCTTGCTGAAGGC	60.081	57.895	96	GATGTTGCCCTGCCACTTG	60.158	57.895	461	347	(ATTT)^6	371	Tetranucleotide
HN7TS9H02EBFYG	GCTAGCTGTTGCACATCCC	59.64	57.895	121	TGCTTGCTCTACCGTTCAC	58.529	52.632	499	321	(CTTT)^13	373	Tetranucleotide
HN7TS9H02EBLRZ	TCTCAATGCTTCAGAAAGTGCC	59.946	45.455	70	CTGCAGTGGCCAAGTAGTG	59.194	57.895	250	151	(AGAT)^11	195	Tetranucleotide
HN7TS9H02EBQAZ	AGTCAAGAAAGTAGATAACATGGGC	59.663	40	67	CTGCATTGAGGATGGTTCCC	59.362	55	480	116	(ATCT)^9	152	Tetranucleotide
HN7TS9H02EBSCS	TCCTTACACTTCCACAGGGTC	59.798	52.381	259	CGGTTTGCTGACCGCATC	60.241	61.111	555	292	(ATTT)^11	336	Tetranucleotide
HN7TS9H02EBVYC	GACGTGTTCCGTGCTATGG	59.358	57.895	113	TGGGCATCAAGGATAGGGC	59.926	57.895	485	202	(GATT)^6	226	Tetranucleotide
HN7TS9H02EC6EZ	GTGGACTGCTTGCTTTCGG	60.158	57.895	409	TCTTCTTTAAACACTGAGGATATGG	57.377	36	613	466	(CTTT)^10	506	Tetranucleotide
HN7TS9H02ECTTK	CGGAAATGAGCTGCCAAGG	59.936	57.895	432	TGTAATCCGCCCTGAGACC	59.551	57.895	700	630	(AATT)^6	654	Tetranucleotide
HN7TS9H02ECVR3	AAGCATGCAAATCCTGCCG	60.232	52.632	35	ACACCAGTGCCTTGTTTACAG	59.463	47.619	468	379	(ACCC)^6	403	Tetranucleotide
HN7TS9H02ED05I	GCAGGCTGATGGTAAAGGC	59.636	57.895	200	TCCGTGGACATTCGAGGTG	60.158	57.895	630	538	(ATGT)^6	562	Tetranucleotide
HN7TS9H02EDD5S	AAGACGGTGCTGTTCAGGC	61.346	57.895	5	CCAGTGGAAAGCGGAAATG	57.64	52.632	321	212	(AAAT)^9	248	Tetranucleotide
HN7TS9H02EDIV2	AGCACACAAATGGTGGACTG	59.436	50	136	AGCATACTTGAGAGATGCCTG	58.29	47.619	352	168	(AAAT)^6	192	Tetranucleotide
HN7TS9H02EDPJS	AGCAGTCATTTGTGGGAACC	59.141	50	157	GGGTCATCGAGTCCAACCC	60.533	63.158	572	390	(AAGG)^12	438	Tetranucleotide
HN7TS9H02EDTSF	ACTGATCCAGACTAACATGGC	58.214	47.619	100	TCTTTGCTCTCACAGTCCAG	57.927	50	390	201	(AAAT)^8	233	Tetranucleotide
HN7TS9H02EE0QS	AGGAGAGGGCACTTGAACC	59.697	57.895	331	TGAGACCTTCAGGTATAGGGC	59.098	52.381	619	562	(ATTT)^6	586	Tetranucleotide
HN7TS9H02EE4CW	TCCCACTGCGTCTTGTAGC	60.455	57.895	214	ACCCACCTTGAGACCTTTGG	60.297	55	530	466	(ATTT)^6	490	Tetranucleotide
HN7TS9H02EE67F	ACTGGTGAGACTTCAGAGACC	59.525	52.381	16	AGCTACTGGCCCACATCAG	59.853	57.895	299	80	(AAAT)^6	104	Tetranucleotide
HN7TS9H02EEA73	CTAGCCCTCATGCTTGCAC	59.341	57.895	199	CCTAGTATAGGTCTATGGACACAGG	59.836	48	511	344	(ATTT)^9	380	Tetranucleotide
HN7TS9H02EEBY1	CCCACCCTAAGACCTCTGC	59.853	63.158	1	TGCACTAGATGGTGGAGCC	59.854	57.895	253	51	(AAAT)^6	75	Tetranucleotide
HN7TS9H02EEG1J	AGCCTTGTGGAAATAGCACTTG	59.945	45.455	77	TCCTTACTTATTTGAGTTCCAGGTTG	59.844	38.462	357	244	(AAGG)^19	320	Tetranucleotide
HN7TS9H02EEMAF	TTGCAACACCTGGAGGAC	57.852	55.556	131	ACCCACTGGCATATCTGGG	59.539	57.895	413	313	(AAGG)^9	349	Tetranucleotide
HN7TS9H02EEUOO	GTGAGGGCCGAACCAGTC	60.789	66.667	50	CTCAGTCAAGTTCATAGGTGGC	59.493	50	421	288	(AGAT)^10	328	Tetranucleotide
HN7TS9H02EEWCF	TGGGCTTATGTTGCAAGGC	59.479	52.632	49	GTGTGTCCAGCAAATCGGG	59.863	57.895	342	127	(AAGG)^19	203	Tetranucleotide
HN7TS9H02EEZBN	ACGATCTTCAGTTGGCTATCAG	58.708	45.455	0	TGGGTGAGAAGAGGCCTTG	59.698	57.895	300	108	(CTTT)^15	168	Tetranucleotide
HN7TS9H02EF0LF	AGGCGGAAACAATTGATGGG	59.576	50	40	GTCTTGCAGGCTTGTTGGG	60.083	57.895	317	103	(ATTT)^6	127	Tetranucleotide
HN7TS9H02EF2CO	GAGACAGCAGACTGGATTGC	59.377	55	70	GTGAGCCATTTCTGGGCAC	59.86	57.895	475	282	(ATCC)^6	306	Tetranucleotide
HN7TS9H02EF9B8	GCAACCGTGGAGATCCTTG	59.27	57.895	38	AGAGTGGTGAGGTTGCACG	60.679	57.895	317	99	(AAGG)^11	143	Tetranucleotide
HN7TS9H02EFCKN	GCAAAGTGCAACCAGAAGC	58.841	52.632	92	GAAAGGAAACCAGCCGAGC	59.863	57.895	404	249	(AATG)^10	289	Tetranucleotide
HN7TS9H02EFJW8	ACTGTGGTAACCTGCCCTC	59.699	57.895	173	TGTTCTCCATTGCACCAAGC	59.795	50	410	225	(AAAT)^6	249	Tetranucleotide
HN7TS9H02EFM7O	AAGTCTTGTGCCGCTTTGC	60.379	52.632	88	GCTTCAACCAGGACAAGGG	59.106	57.895	499	187	(CATT)^8	219	Tetranucleotide
HN7TS9H02EFQY1	GTGGCCAGGAAACAGAAGTC	59.512	55	20	CTGCAGCTGAATAAAGAATGCC	59.048	45.455	451	241	(AATT)^6	265	Tetranucleotide
HN7TS9H02EFZ2H	AGGTGGAATTCAGGGACCTC	59.488	55	18	TGTTCCACAGTGCCTAACAG	58.502	50	311	63	(ATTT)^6	87	Tetranucleotide
HN7TS9H02EG6N5	CTGCCAGGGAAGCAGGTC	60.796	66.667	13	CAAGGACATTAAAGCTAGCCAATC	58.938	41.667	442	332	(CTTT)^14	388	Tetranucleotide
HN7TS9H02EG920	AGGATGGGCTGGACAGTTG	60.08	57.895	247	CTGCAGACATTTCAGTGCG	58.053	52.632	622	553	(ATCT)^8	585	Tetranucleotide
HN7TS9H02EGDI3	ACAAGGGCCTCGAACTCTG	60.082	57.895	152	CCATAAGTAACCGTGCCAACC	60.012	52.381	422	215	(ATTT)^7	243	Tetranucleotide
HN7TS9H02EGJY3	CTGCCTGTGCAGATTGGC	59.853	61.111	111	GAGTTCTGCCTGTGTGACC	58.822	57.895	525	408	(AAGC)^6	432	Tetranucleotide
HN7TS9H02EH4L4	AAGGAAGTGAAACAGCTATGC	57.275	42.857	309	AATCCTCCAGCCTTGCCC	60.082	61.111	651	503	(ATTT)^6	527	Tetranucleotide
HN7TS9H02EH9CM	TGCAAGTGTGCCAAGAACTG	60.01	50	33	GATCCAAGGCCAGTGGAGG	60.537	63.158	335	176	(ATCT)^9	212	Tetranucleotide
HN7TS9H02EHB8H	AAAGGACCCGAGTGCAGAC	60.383	57.895	378	TGGCTGACAGAACAGTACTCC	60.146	52.381	585	460	(ATCT)^6	484	Tetranucleotide
HN7TS9H02EHDNE	TTGCATCCTGTCCCAGAGC	60.46	57.895	437	ACAATGGCCTTATGCTGCC	59.249	52.632	587	493	(AAGG)^10	533	Tetranucleotide
HN7TS9H02EHHR8	AGGACCCATCACACTTGCG	60.758	57.895	169	ACCTGCCCTGAGACCTTTG	60.004	57.895	469	404	(ATTT)^6	428	Tetranucleotide
HN7TS9H02EHKWL	TGGCTTGTCCATGCATTTG	57.528	47.368	221	AAATACCGCAGTTGTTAGAGC	57.372	42.857	616	419	(CTTT)^9	455	Tetranucleotide
HN7TS9H02EHT4B	GCTTTCCACTTGTGAGCACG	60.776	55	295	GGGTACCAATGCAGAAGGC	59.257	57.895	581	493	(AATG)^6	517	Tetranucleotide
HN7TS9H02EHXK4	TCCTCAGTGATATTCCAGGC	57.162	50	238	GGACAGTGGACTTGTGATTGC	60.214	52.381	668	389	(CTTT)^7	417	Tetranucleotide
HN7TS9H02EIY4B	CAGCACAGTTTGACCGGAG	59.497	57.895	251	CTGATAGCGGAGTTGCACG	59.434	57.895	572	287	(AAAT)^8	319	Tetranucleotide
HN7TS9H02EJBWX	AGGTCCAGTGAAGAAGGGC	59.697	57.895	80	AGCCTCTAGATGAAAGGCAGG	60.007	52.381	365	309	(ATTT)^6	333	Tetranucleotide
HN7TS9H02EJHTX	ACTGCAACGTCTTGGCCTC	61.346	57.895	407	TGAATGGCCTGGTCCTAGTG	59.86	55	606	446	(ATTT)^6	470	Tetranucleotide
HN7TS9H02EJNC9	CCGAACTTGTCTGGGCAAC	59.79	57.895	117	CCCAGAGGTGAGGGAACTC	59.471	63.158	485	157	(AAGG)^13	209	Tetranucleotide
HN7TS9H02EJUQX	CCAGCTAGACCTCCTTGCC	60.233	63.158	288	TGTGCCATGCACCTTTCAC	59.709	52.632	730	490	(ATTT)^10	530	Tetranucleotide
HN7TS9H02EJWGK	ACCTGTCACTTTGGATGCTC	58.568	50	82	CCAGACATTTCCACAGCCC	59.18	57.895	433	285	(AAAT)^6	309	Tetranucleotide
HN7TS9H02EJZDR	AGCCAGTTGCATAAATTACCG	57.697	42.857	27	GCTACACACGGAGCTTCAAC	59.944	55	258	58	(ATTT)^7	86	Tetranucleotide
HN7TS9H02EKHO4	AAAGGTTCCAGGGTGGGTC	59.925	57.895	230	GCCTAAGGGAGCAGGGTC	59.844	66.667	456	261	(AAAT)^7	289	Tetranucleotide
HN7TS9H02EKPXG	AGATCTGAATACTAAGGCAAAGC	57.173	39.13	89	GTCACCCTGGTGCAGAGC	61.103	66.667	517	234	(AAGG)^11	278	Tetranucleotide
HN7TS9H02EKQSV	ACAGATTGTGGAGGGCAG	57.271	55.556	60	AGCCTGTCTATTCAGGGCTC	59.642	55	394	231	(ATTT)^6	255	Tetranucleotide
HN7TS9H02EKYMV	AAGACAGGCCCAAATGGTG	58.707	52.632	333	GAGCAAGACCAGGACCCTC	60.157	63.158	637	398	(ATCT)^15	458	Tetranucleotide
HN7TS9H02EL0C3	TGTGTGCAGGACTTCTGGG	60.309	57.895	121	CTCATCAGCTTGAGGACACC	58.729	55	534	459	(AGGG)^7	487	Tetranucleotide
HN7TS9H02EL1MG	GACTGTTCTTGGCCGCTTG	60.158	57.895	138	ATTATGAACATGAATACTCCTCCAG	57.251	36	444	367	(AAAT)^10	407	Tetranucleotide
HN7TS9H02EL6G0	TGGGCCTTATCCACCTGAAC	60.151	55	67	TATGCAGCCAGCTTTCACC	58.879	52.632	505	302	(AGGG)^12	350	Tetranucleotide
HN7TS9H02ELEGQ	CTGATGAGTCGTTCCCGTG	58.695	57.895	124	CGTGGGAACCTTAGCTTGAG	59.02	55	494	363	(AATG)^8	395	Tetranucleotide
HN7TS9H02ELP0R	ACACTGTGCAGCAAATCCC	59.407	52.632	55	TGCCACCAAAGCAAAGAGC	60.008	52.632	422	107	(AAGG)^12	155	Tetranucleotide
HN7TS9H02ELW1V	TCCTTCCGATTAGCTTCCAG	57.479	50	276	CTCAGGCCTCACAAAGTGC	59.491	57.895	661	308	(CTTT)^16	372	Tetranucleotide
HN7TS9H02EM30P	ACATAGCCTGAGACCTTTCC	57.382	50	215	CGCAGGCCACTTTGATTCC	60.232	57.895	642	262	(ATTT)^7	290	Tetranucleotide
HN7TS9H02EM8O8	CAACCTGTGGAAGCTGAGG	58.81	57.895	34	GCATGGTCTTGTTCCAACTTTAC	59.21	43.478	454	166	(AAGG)^12	214	Tetranucleotide
HN7TS9H02EMEJY	GGGTGGCAGTTGCAATATC	57.396	52.632	45	ACTTAAAGCGAAGGTAAGTTGG	57.402	40.909	254	116	(ATTT)^8	148	Tetranucleotide
HN7TS9H02EMKDG	GAAGTTCTGTGGTGGTCCC	58.427	57.895	51	TACTCTCCTGGCCTTTCGG	59.169	57.895	444	168	(ATTT)^6	192	Tetranucleotide
HN7TS9H02EMKEC	TACTCACCTGTGGACTGCC	59.398	57.895	206	GCATCCAACCCATTACTGCC	60.009	55	486	295	(ATTT)^6	319	Tetranucleotide
HN7TS9H02EMQXZ	AAATATTCACAGGGCTATGCAG	57.303	40.909	54	ACCTAATTCAAGTTGCCACAG	57.191	42.857	238	96	(ATGT)^6	120	Tetranucleotide
HN7TS9H02EMX5P	TCCCAGAAAGCACAGCCTC	60.385	57.895	305	CTTCACCCAGGCCTTTGAC	59.106	57.895	578	401	(ATTT)^6	425	Tetranucleotide
HN7TS9H02EN2A1	CAGTGCAATCCCAAATGGC	58.297	52.632	24	GTGTGGATGGAAGAGGCAAC	59.583	55	205	92	(AATG)^7	120	Tetranucleotide
HN7TS9H02EN3H6	GCCACAACTCATGTGGGAC	59.488	57.895	216	AGAGGACAATTCGCCTATGG	57.841	50	593	476	(GATT)^7	504	Tetranucleotide
HN7TS9H02EN8XV	TGGGCACTTTCATGGGCAG	61.372	57.895	1	AGAGTGGTGAGGTTGCACG	60.679	57.895	318	100	(AAGG)^11	144	Tetranucleotide
HN7TS9H02END2P	CAGATGCTACCACACCTAAGC	59.198	52.381	139	GCCAGTAATGGAGTGCAGG	58.962	57.895	304	191	(CTTT)^15	251	Tetranucleotide
HN7TS9H02ENUOQ	AACACTAGCTGCCACATGC	59.187	52.632	102	TGGTGGTGCCGTAGAACAG	60.382	57.895	535	231	(ATTT)^7	259	Tetranucleotide
HN7TS9H02EOFRT	CCCTAATGGTCCTCTGCCC	59.927	63.158	167	TGCTGCAAGCCTAAAGAAAGG	59.873	47.619	490	376	(ATTT)^6	400	Tetranucleotide
HN7TS9H02EOFS0	TCGTGGTCACTACAGAAGCC	60.152	55	69	GGTCATCAGCATGGAGCCC	61.284	63.158	317	115	(ATCC)^10	155	Tetranucleotide
HN7TS9H02EOIBC	TCACGGCGTCCATTTCTCC	60.826	57.895	132	GGCACATCTAGGAACTCTTGC	59.47	52.381	454	345	(AGAT)^9	381	Tetranucleotide
HN7TS9H02EOKWL	CTTAAAGCCGGCAGCCAC	59.855	61.111	85	TTGTAGCCTGCCCTGAGAC	59.778	57.895	307	241	(CATT)^6	265	Tetranucleotide
HN7TS9H02EOLKL	TCGTTGTGACCCACCCTG	59.926	61.111	53	AAGAACTCGTCTGGTGCGG	60.749	57.895	388	106	(AAAT)^10	146	Tetranucleotide
HN7TS9H02EONAG	ACATTCTGATGTCATGATCCCAC	59.315	43.478	305	GTTTGGAAGGCTGAGACGC	59.865	57.895	506	420	(AGTT)^7	448	Tetranucleotide
HN7TS9H02EOODS	GCACTTTCTGTCCAACAGGG	59.797	55	82	TGTGCCTCAGCTTGGTAGG	60.081	57.895	510	119	(GTTT)^7	147	Tetranucleotide
HN7TS9H02EORB9	ACCTGCCCTGAGACCTTTG	60.004	57.895	299	GGCCCTGTTCCTTCAAACC	59.403	57.895	562	342	(AAAT)^12	390	Tetranucleotide
HN7TS9H02EP1J2	GCAAATGGCAAGCAATGATCC	59.811	47.619	192	TCATGTCTGACCACAGCCC	60.081	57.895	584	460	(GGCT)^6	484	Tetranucleotide
HN7TS9H02EP223	TGCAACCTTCCCTGGAACC	60.616	57.895	53	GCCAACTGCCTGATTGGTG	60.158	57.895	402	107	(GGAT)^11	151	Tetranucleotide
HN7TS9H02EP6Q3	ACTAGAACAGGCAAAGTCCAAG	59.023	45.455	18	TGTGTATGGTTGGCCGGAG	60.459	57.895	336	56	(ACAG)^6	80	Tetranucleotide
HN7TS9H02EP6YB	GTTTGGAAGGCTGAGACGC	59.865	57.895	394	AGTGGGTAGTGTTTGATTTCATAG	57.46	37.5	615	455	(AACT)^6	479	Tetranucleotide
HN7TS9H02EPDVY	ACCAGCCCTGAGACCTTTG	60.004	57.895	441	ACCCAGTGCTCCCAGTTAG	59.39	57.895	625	487	(AATG)^7	515	Tetranucleotide
HN7TS9H02EPFSF	GGCAATCCCAAATGGTAGCC	60.008	55	186	AGCCCATTTCTTCAGGTAGGG	60.216	52.381	538	291	(GATT)^9	327	Tetranucleotide
HN7TS9H02EPUHT	GACAATGGCTGCATCCGAC	60.012	57.895	396	TGGCATTTGCAAGTTCAAGG	58.223	45	559	462	(ATTT)^6	486	Tetranucleotide
HN7TS9H02EPWOI	AGCAGATGAGAATGGTCCC	57.247	52.632	174	TCAGAATATCCATGCTTTATTCCAG	57.787	36	548	466	(AATG)^8	498	Tetranucleotide
HN7TS9H02EQTK8	GGTGGGATGGGAACATTAGC	59.069	55	34	GTCCCTCAGGTCTTAGGTGG	59.571	60	430	97	(ATTT)^6	121	Tetranucleotide
HN7TS9H02ER3QU	GGCGTGTCCGAAGAACAG	59.171	61.111	63	GCAGGACCGTAAGTTTGGC	59.864	57.895	340	204	(CTTT)^16	268	Tetranucleotide
HN7TS9H02ER4I6	CCATGAGACTTTCAGGAATAGGG	59.061	47.826	84	ATCTTGTGGTGCCCTGGAG	60.08	57.895	274	155	(AGAT)^11	199	Tetranucleotide
HN7TS9H02ERFFO	TGTGACCTGCTGTGAAGCC	60.982	57.895	94	CACCATCTGGAGCCAGTCC	60.534	63.158	243	129	(AAAT)^6	153	Tetranucleotide
HN7TS9H02ERHWA	ATGGAACCAGGAATGGAGG	57.131	52.632	119	TCCACCCTTGGACCTTTGG	59.925	57.895	310	223	(ACTC)^6	247	Tetranucleotide
HN7TS9H02ERILM	GGAACTCATTCATTTGGTTCAGC	59.27	43.478	67	GAGATGCAGAAGACAGGTTTGG	60.012	50	422	300	(AGAT)^7	328	Tetranucleotide
HN7TS9H02ES2R3	TGGGCTGGAGTTATGCAGG	60.157	57.895	86	CCAGGTCCTAGGCAGGTTG	60.157	63.158	370	200	(AAGG)^15	260	Tetranucleotide
HN7TS9H02ES8XM	CACAGTCAGCAGATTGCCC	59.565	57.895	59	CCCACATTGGCTGCACATC	60.232	57.895	334	159	(AATG)^11	203	Tetranucleotide
HN7TS9H02ESI4Z	ACATGCAGGCAGCTTAGAAC	59.296	50	31	TCTTTCCAACCTGGAGCGG	60.384	57.895	478	141	(AGAT)^12	189	Tetranucleotide
HN7TS9H02EU0K9	ACAGGGCCTCAGAAACTCC	59.697	57.895	150	ACTGAACTTATGGAATGGACAAC	57.548	39.13	596	440	(CTTT)^16	504	Tetranucleotide
HN7TS9H02EUW8L	TCTTTCCTCCTCCAGTGAGC	59.497	55	20	GAGATCTGCCAGGGAGCC	59.925	66.667	394	63	(ATTT)^8	95	Tetranucleotide
HN7TS9H02EUXUC	AGGTTGCCAAATGGATTTCCTG	60.207	45.455	37	TGGTCACAGGGAAGGATGC	60.081	57.895	375	147	(AAGG)^17	215	Tetranucleotide
HN7TS9H02EV2OE	GTGAGACTCCCAATAGAACAGC	59.232	50	39	GCTGGCAGGTAGTTGAATGAG	59.741	52.381	357	218	(AAAT)^7	246	Tetranucleotide
HN7TS9H02EV42F	TGAGGTGTGCCCGATATCTTC	60.352	52.381	71	GTGGAAACCGCACTTGGAG	59.79	57.895	425	295	(AGAT)^10	335	Tetranucleotide
HN7TS9H02EV640	GCCTAAGAGTCTGGGACCAC	60.223	60	245	TGTGATGACATTAGCATTGGGC	60.076	45.455	484	345	(AAGG)^12	393	Tetranucleotide
HN7TS9H02EVCIB	ACAGCGGGTATAGGACAGG	58.939	57.895	86	TGGGAACCCACAGGTTCAG	59.927	57.895	449	117	(AAAT)^6	141	Tetranucleotide
HN7TS9H02EVKG9	CCCTGGTCTCTGGCTGAAG	60.157	63.158	193	AGAAATTCCATCCACACTTGTC	57.374	40.909	434	345	(AGAT)^9	381	Tetranucleotide
HN7TS9H02EVQ1X	TGTGCCTTCCCAGAGTAACC	60.079	55	25	AAGTGCTGGGTTGAGAAGC	58.726	52.632	313	163	(CTTT)^12	211	Tetranucleotide
HN7TS9H02EW7NG	TCACATCAGTCAGGCTTGG	57.812	52.632	94	GTGGAATGGCCTTCTTGGTG	59.866	55	451	368	(AAAT)^6	392	Tetranucleotide
HN7TS9H02EW8RT	GCAACCAAATAGGGCCTGAC	59.938	55	257	CTGTCCACGACTGACTTTGC	59.874	55	567	400	(AAGG)^18	472	Tetranucleotide
HN7TS9H02EWC2E	CTCTCCCTCTGGGCTGAAC	59.855	63.158	142	CATGGTCCAGTTTGCCACC	59.783	57.895	464	313	(ATTT)^9	349	Tetranucleotide
HN7TS9H02EWD6Q	TCATTGGCAGTTTCCCAGC	59.099	52.632	12	AGCACCAGGTCGAATAGGC	60.233	57.895	447	347	(GATT)^9	383	Tetranucleotide
HN7TS9H02EWF2M	ACACCACAGACGAATGTTCAG	59.268	47.619	71	GTGTCAGGAACCTACCTGGG	60.151	60	263	152	(GTTT)^6	176	Tetranucleotide
HN7TS9H02EWI7F	ATGGAAAGATCCGTGCCTC	57.965	52.632	12	GTGTCTTGGTTCTTGAGACCTG	59.623	50	305	46	(GGAT)^10	86	Tetranucleotide
HN7TS9H02EWNOG	GGGTCGAATGGCAACCAG	59.148	61.111	3	TCAAGATACATTGACGCTCAGG	58.972	45.455	152	69	(CTTT)^10	109	Tetranucleotide
HN7TS9H02EX0MQ	TCTCTGCCCTGCATCCTAC	59.242	57.895	15	TAAACCTGAGCTTGGGCAG	58.107	52.632	424	129	(CTTT)^13	181	Tetranucleotide
HN7TS9H02EXO2A	TCTGGAAACGTGGCCTGTC	60.681	57.895	89	GCTCAGGGACATCTGGAGG	59.93	63.158	307	224	(AATG)^9	260	Tetranucleotide
HN7TS9H02EXU4L	CCCTCCCTACTTTCAGGCTAC	60.008	57.143	5	TCTGTCAAAGCCCATTCTGC	59.219	50	193	133	(AAAT)^6	157	Tetranucleotide
HN7TS9H02EXZZ3	CCCTCCCTGAGACCTTTGG	59.774	63.158	36	CGGTTTACGGTTTCGTCGG	59.944	57.895	311	86	(ACAT)^6	110	Tetranucleotide
HN7TS9H02EYGR7	ACTGTCTGGAAGTCAATCCAC	58.355	47.619	119	TGGCTGGTTCGGTAAGGAG	59.779	57.895	428	186	(ATCT)^11	230	Tetranucleotide
HN7TS9H02EYL97	GGGTTTCCGTATAGTTGCATCC	59.882	50	9	TGCTCAAGGCGCATTTCTG	59.863	52.632	372	129	(AGGC)^14	185	Tetranucleotide
HN7TS9H02EYMLO	TGCATTGGCTTTCTCAGCAC	60.152	50	332	GGCAACGAATCACTGGGAC	59.568	57.895	649	492	(AGAT)^9	528	Tetranucleotide
HN7TS9H03F08OZ	GGCACAAGGCAAGTGTCTAC	59.87	55	24	CAATGCCAACACATTGGGC	58.898	52.632	432	238	(AATG)^6	262	Tetranucleotide
HN7TS9H03F0PNP	CCGCTATATGCAAGCAAGGG	59.87	55	211	CCACAGACGGTGTGCAATC	59.865	57.895	550	261	(AGGG)^6	285	Tetranucleotide
HN7TS9H03F0QZ1	ACTGCAACGTCTTGGCCTC	61.346	57.895	202	TGAATGGCCTGGTCCTAGTG	59.86	55	410	241	(ATTT)^6	265	Tetranucleotide
HN7TS9H03F0TWG	CCCAGAAACACTTGCCTAGC	59.583	55	58	ACCTGCCCTGAGACATTCG	60.157	57.895	296	238	(ATTT)^6	262	Tetranucleotide
HN7TS9H03F0ZKR	TTGTTGGTAGCCGCCCAG	60.718	61.111	76	CCAAGCTCCTAGCCTCCAG	59.93	63.158	312	139	(AAAT)^7	167	Tetranucleotide
HN7TS9H03F15MX	ACTCGGAGCCTAAATGGGAG	59.643	55	246	GGTGAGGGAGACTGGCTTG	60.459	63.158	404	306	(AAGG)^13	358	Tetranucleotide
HN7TS9H03F18EX	CTTTCATCCACATTAAAGGCCAG	58.761	43.478	22	CTGCTACATCATCTGCAAGC	57.697	50	246	144	(ATTT)^6	168	Tetranucleotide
HN7TS9H03F1B8F	TCCTACAGACCAACTCCTTAACC	59.945	47.826	31	TGTTCAATTGTAAAGTCTTCTGGG	58.137	37.5	248	155	(CATT)^7	183	Tetranucleotide
HN7TS9H03F1IUT	TTGTAACCCGCCCTGAGAC	60.082	57.895	125	GCAATCTGGGTCTAGCCTG	58.356	57.895	301	173	(AAAT)^6	197	Tetranucleotide
HN7TS9H03F1QXV	TCCTGGTGAATGGTGGGATAC	59.936	52.381	62	TTTAACGCACCTGCTTCCG	59.496	52.632	384	156	(AAGG)^15	216	Tetranucleotide
HN7TS9H03F1RUF	AGTACCACCACTGAGGAGC	59.09	57.895	27	TGCCTCCACCAGTGATTCC	60.081	57.895	448	361	(ATGC)^6	385	Tetranucleotide
HN7TS9H03F22US	TGATATTCTCCTCTGGAAACTACTG	58.427	40	6	AGAATAGAATTCCTTCCATTTGGG	57.485	37.5	197	115	(ATTT)^7	143	Tetranucleotide
[truncated: 1,155 more rows]
